# Supplementary material for: Comprehensive analysis of differential long non-coding RNA and messenger RNA expression in cholelithiasis using high-throughput sequencing and bioinformatics
Source: Front Genet. 2024 May 14;15:1375019. doi: 10.3389/fgene.2024.1375019 (PMC11130440; doi:10.3389/fgene.2024.1375019)
Supplement: Supplementary file 5 [file Table6.XLSX]

## Sheet: mRNA_GO
TableS5 GO analysis results of DEmRNAs
ONTOLOGY	ID	Description	GeneRatio	BgRatio	pvalue	p.adjust	qvalue	geneID	Count
BP	GO:0042445	hormone metabolic process	51/854	233/18670	3.90804e-21	2.03101e-17	1.56363e-17	UGT1A9/UGT1A8/AKR1C2/UGT1A7/RBP4/CYP17A1/UGT1A3/GHRHR/UGT2B11/AKR1C1/ADH1A/CYP1A1/ERO1B/DIO2/AKR1B10/UGT1A1/ALDH1A1/AKR1C3/AKR1B15/SHH/ADH1C/DUOXA2/STC2/AKR1C4/CES1/DUOX2/BCO1/HPN/SPP1/APOA1/UGT2B7/TTR/CRABP2/SCARB1/RDH12/CYP3A7/CHST8/PON3/LRAT/SERPINA6/HSD11B2/CYP2C8/BCO2/PPARGC1A/ALDH1A2/CYP2C9/EGR1/HSD11B1/DKK3/ACE2/KLK6	51
BP	GO:0071466	cellular response to xenobiotic stimulus	43/854	180/18670	1.50406e-19	3.9083e-16	3.00891e-16	UGT1A9/UGT1A8/UGT1A7/UGT1A3/UGT1A6/UGT2B11/EPHX1/AKR1C1/GSTA2/UGT1A4/CYP1A1/CYP2B6/MGST1/UGT2B28/GSTA1/ABCC2/UGT1A1/DPEP1/ASS1/UGT1A5/NQO1/ALDH3A1/CES1/MGST2/AADAC/CMBL/ICAM1/BAAT/PCK2/GGT1/AKR7A3/CYP3A7/PON3/GJB2/SERPINF1/CYP2C8/UGT2B15/PPARGC1A/ACY3/CYP2C9/EGR1/CYP2A6/FMO1	43
BP	GO:0030198	extracellular matrix organization	62/854	368/18670	3.11102e-19	4.65235e-16	3.58174e-16	CCN1/FAP/FGG/TIMP1/CCN2/ERO1B/VCAN/COL3A1/FGA/SERPINE1/COL1A1/COL8A2/COMP/BGN/THBS1/COL1A2/LOXL1/PLG/MMP23B/MMP11/AGT/CPB2/GREM1/MMP2/FN1/COL14A1/HPN/LUM/SPP1/PHLDB1/VTN/CD44/COL5A1/SPARC/ICAM1/TTR/ADAMTS4/SMPD3/COL16A1/PXDN/SFRP2/TNFRSF11B/TIMP2/COL5A2/MFAP2/CCDC80/F11R/ITGA5/ITGA11/COL8A1/LAMA4/TGFB2/COL4A1/COL10A1/ADAMTS2/ANTXR1/LRP1/TNXB/SULF2/COL4A2/AEBP1/JAM2	62
BP	GO:0043062	extracellular structure organization	62/854	369/18670	3.5808e-19	4.65235e-16	3.58174e-16	CCN1/FAP/FGG/TIMP1/CCN2/ERO1B/VCAN/COL3A1/FGA/SERPINE1/COL1A1/COL8A2/COMP/BGN/THBS1/COL1A2/LOXL1/PLG/MMP23B/MMP11/AGT/CPB2/GREM1/MMP2/FN1/COL14A1/HPN/LUM/SPP1/PHLDB1/VTN/CD44/COL5A1/SPARC/ICAM1/TTR/ADAMTS4/SMPD3/COL16A1/PXDN/SFRP2/TNFRSF11B/TIMP2/COL5A2/MFAP2/CCDC80/F11R/ITGA5/ITGA11/COL8A1/LAMA4/TGFB2/COL4A1/COL10A1/ADAMTS2/ANTXR1/LRP1/TNXB/SULF2/COL4A2/AEBP1/JAM2	62
BP	GO:0006805	xenobiotic metabolic process	35/854	125/18670	1.58007e-18	1.64233e-15	1.26439e-15	UGT1A9/UGT1A8/UGT1A7/UGT1A3/UGT1A6/UGT2B11/EPHX1/AKR1C1/GSTA2/UGT1A4/CYP1A1/CYP2B6/MGST1/UGT2B28/GSTA1/UGT1A1/DPEP1/UGT1A5/NQO1/ALDH3A1/CES1/MGST2/AADAC/CMBL/BAAT/GGT1/AKR7A3/CYP3A7/PON3/CYP2C8/UGT2B15/ACY3/CYP2C9/CYP2A6/FMO1	35
BP	GO:0034754	cellular hormone metabolic process	35/854	129/18670	4.78911e-18	4.14817e-15	3.19358e-15	UGT1A9/UGT1A8/AKR1C2/UGT1A7/RBP4/CYP17A1/UGT1A3/UGT2B11/AKR1C1/ADH1A/CYP1A1/AKR1B10/UGT1A1/ALDH1A1/AKR1C3/AKR1B15/SHH/ADH1C/AKR1C4/BCO1/SPP1/UGT2B7/TTR/CRABP2/SCARB1/RDH12/CYP3A7/LRAT/CYP2C8/BCO2/PPARGC1A/ALDH1A2/CYP2C9/EGR1/DKK3	35
BP	GO:0009410	response to xenobiotic stimulus	52/854	292/18670	2.25183e-17	1.67182e-14	1.2871e-14	UGT1A9/UGT1A8/UGT1A7/HTR2A/UGT1A3/UGT1A6/UGT2B11/EPHX1/AKR1C1/GSTA2/UGT1A4/CYP1A1/CYP2B6/MGST1/HTR1B/UGT2B28/GSTA1/ABCC2/UGT1A1/DPEP1/ASS1/UGT1A5/RGS4/NQO1/ALDH3A1/HOMER1/CES1/MGST2/AADAC/CMBL/ICAM1/BAAT/PCK2/GGT1/CXCR4/AKR7A3/CYP3A7/PON3/GJB2/GCLC/SERPINF1/CYP2C8/UGT2B15/PPARGC1A/ACY3/CYP2C9/EGR1/CYP2A6/PENK/FMO1/FOSB/PEA15	52
BP	GO:0006721	terpenoid metabolic process	33/854	120/18670	2.76531e-17	1.79641e-14	1.38302e-14	UGT1A9/UGT1A8/UGT1A7/RBP4/UGT1A3/AKR1C1/ADH1A/CYP1A1/AKR1B10/UGT1A1/ALDH1A1/APOB/RBP2/AKR1C3/ALDH3A2/AKR1B15/ADH1C/AKR1C4/BCO1/APOA1/TTR/CRABP2/RDH12/CYP3A7/LRAT/HMGCS2/SDC1/CYP2C8/BCO2/ALDH1A2/LRP2/CYP2C9/LRP1	33
BP	GO:0016101	diterpenoid metabolic process	31/854	110/18670	1.18926e-16	6.86733e-14	5.287e-14	UGT1A9/UGT1A8/UGT1A7/RBP4/UGT1A3/AKR1C1/ADH1A/CYP1A1/AKR1B10/UGT1A1/ALDH1A1/APOB/RBP2/AKR1C3/ALDH3A2/AKR1B15/ADH1C/AKR1C4/BCO1/APOA1/TTR/CRABP2/RDH12/CYP3A7/LRAT/SDC1/CYP2C8/BCO2/ALDH1A2/LRP2/LRP1	31
BP	GO:0001523	retinoid metabolic process	30/854	104/18670	1.82002e-16	9.45863e-14	7.28199e-14	UGT1A9/UGT1A8/UGT1A7/RBP4/UGT1A3/AKR1C1/ADH1A/CYP1A1/AKR1B10/UGT1A1/ALDH1A1/APOB/RBP2/AKR1C3/AKR1B15/ADH1C/AKR1C4/BCO1/APOA1/TTR/CRABP2/RDH12/CYP3A7/LRAT/SDC1/CYP2C8/BCO2/ALDH1A2/LRP2/LRP1	30
BP	GO:0006720	isoprenoid metabolic process	34/854	139/18670	4.57226e-16	2.16018e-13	1.66308e-13	UGT1A9/UGT1A8/UGT1A7/RBP4/UGT1A3/AKR1C1/ADH1A/CYP1A1/PHYH/AKR1B10/UGT1A1/ALDH1A1/APOB/RBP2/AKR1C3/ALDH3A2/AKR1B15/ADH1C/AKR1C4/BCO1/APOA1/TTR/CRABP2/RDH12/CYP3A7/LRAT/HMGCS2/SDC1/CYP2C8/BCO2/ALDH1A2/LRP2/CYP2C9/LRP1	34
BP	GO:0052695	cellular glucuronidation	14/854	19/18670	1.48693e-15	6.43964e-13	4.95773e-13	UGT1A9/UGT1A8/UGT1A7/UGT1A3/UGT1A6/UGT2B11/UGT1A4/UGT2B28/UGT1A1/UGT2B17/UGT1A5/UGT2B7/UGT2A3/UGT2B15	14
BP	GO:0006063	uronic acid metabolic process	15/854	24/18670	6.33279e-15	2.35082e-12	1.80985e-12	UGT1A9/UGT1A8/UGT1A7/UGT1A3/UGT1A6/UGT2B11/SORD/UGT1A4/UGT2B28/UGT1A1/UGT2B17/UGT1A5/UGT2B7/UGT2A3/UGT2B15	15
BP	GO:0019585	glucuronate metabolic process	15/854	24/18670	6.33279e-15	2.35082e-12	1.80985e-12	UGT1A9/UGT1A8/UGT1A7/UGT1A3/UGT1A6/UGT2B11/SORD/UGT1A4/UGT2B28/UGT1A1/UGT2B17/UGT1A5/UGT2B7/UGT2A3/UGT2B15	15
BP	GO:0008202	steroid metabolic process	49/854	331/18670	3.23915e-13	1.12226e-10	8.64001e-11	UGT1A8/AKR1C2/CYP17A1/UGT2B11/AKR1C1/G6PD/CYP1A1/CYP2B6/UGT2B28/UGT1A1/UGT2B17/SULT2B1/TM7SF2/APOB/FGF19/AKR1C3/AKR1B15/SHH/AGT/AKR1C4/NR0B2/CES1/SPP1/CYP51A1/PON1/APOA1/UGT2B7/BAAT/SCARB1/TFCP2L1/CYP3A7/IGFBP7/HMGCS2/LEPR/ELOVL6/SERPINA6/HSD11B2/CYP2C8/UGT2B15/PPARGC1A/LRP2/CYP2C9/EGR1/HSD11B1/CYP2A6/SLC27A2/NPC1L1/MSMO1/DKK3	49
BP	GO:0052697	xenobiotic glucuronidation	10/854	11/18670	4.02134e-13	1.30618e-10	1.0056e-10	UGT1A9/UGT1A8/UGT1A7/UGT1A3/UGT1A6/UGT2B11/UGT1A4/UGT2B28/UGT1A1/UGT1A5	10
BP	GO:0010038	response to metal ion	49/854	362/18670	9.41077e-12	2.87693e-09	2.21488e-09	TAT/FGG/G6PD/SORD/CYP1A1/PTGS2/FGA/CAV1/CYB5A/ABCC2/SLC30A2/DPEP1/ASS1/THBS1/AKR1C3/GOT1/NQO1/SHH/SOD3/HOMER1/TFR2/ENDOG/SPARC/ICAM1/ADGRV1/SYT8/S100A13/SMPD3/TTN/TNFRSF11B/JUND/RASGRP2/SLC25A24/GCLC/SERPINF1/SDC1/DUSP1/FSTL3/PPARGC1A/CA2/TRPV6/CPNE2/JUNB/CRIP1/SLC30A10/PENK/IGFBP2/FOSB/SYT13	49
BP	GO:0001503	ossification	51/854	398/18670	2.77293e-11	8.00606e-09	6.16369e-09	CCN1/CCN2/NELL1/VCAN/PTGS2/ATP6V1B1/MEF2D/WWTR1/BMP3/COL1A1/COMP/COL1A2/ECM1/PHEX/ESRRA/SHH/PPARGC1B/TPM4/EGR2/GREM1/MMP2/CDH11/SPP1/STC1/CLEC11A/TMEM119/GLI2/CTHRC1/SPARC/ADGRV1/MGP/SMPD3/SFRP2/JUND/COL5A2/LTF/TGFB3/ITGA11/NAB1/FAT4/FSTL3/ROR2/TGFB2/JAG1/HGF/PDLIM7/DCHS1/JUNB/PENK/ASGR2/IGF1	51
BP	GO:0042573	retinoic acid metabolic process	14/854	32/18670	3.45327e-11	9.44559e-09	7.27195e-09	UGT1A9/UGT1A8/UGT1A7/UGT1A3/ADH1A/CYP1A1/UGT1A1/AKR1C3/ADH1C/CRABP2/CYP3A7/CYP2C8/BCO2/ALDH1A2	14
BP	GO:0009812	flavonoid metabolic process	10/854	15/18670	9.28219e-11	2.41198e-08	1.85693e-08	UGT1A9/UGT1A8/UGT1A7/UGT1A3/UGT1A6/UGT1A4/CYP1A1/UGT1A1/UGT1A5/PPARGC1A	10
BP	GO:0034308	primary alcohol metabolic process	21/854	85/18670	1.55835e-10	3.85654e-08	2.96906e-08	AKR1C2/RBP4/AKR1C1/ADH1A/CYP1A1/AKR1B10/ALDH1A1/AKR1C3/ALDH3A2/AKR1B15/SULT1C4/ADH1C/AKR1C4/BCO1/TTR/CHKA/RDH12/LRAT/ALDH1A2/DKK3/IGF1	21
BP	GO:0048545	response to steroid hormone	48/854	383/18670	2.32294e-10	5.48741e-08	4.22463e-08	TAT/GHRHR/CCN2/IDH1/HTR1B/PTGS2/CAV1/COL1A1/ABCC2/UGT1A1/ASS1/SCGB2A1/THBS1/AKR1C3/GOT1/ESRRA/ABHD2/ALDH3A1/NR0B2/PPARGC1B/NR4A1/RUNX1/SPP1/STC1/SPARC/ICAM1/NR4A3/PCK2/IGFBP7/IL1RN/SSTR5/GJB2/TGFB3/LBH/ANXA1/SERPINF1/HSD11B2/SDC1/ZFP36L1/DUSP1/HEYL/PPARGC1A/CA2/TGFB2/IGFBP2/FHL2/TCF21/FOSB	48
BP	GO:0031960	response to corticosteroid	29/854	162/18670	2.4884e-10	5.6227e-08	4.32879e-08	TAT/GHRHR/CCN2/HTR1B/PTGS2/COL1A1/ABCC2/UGT1A1/ASS1/AKR1C3/GOT1/ALDH3A1/PPARGC1B/STC1/SPARC/ICAM1/PCK2/IGFBP7/IL1RN/SSTR5/GJB2/ANXA1/SERPINF1/HSD11B2/SDC1/ZFP36L1/DUSP1/IGFBP2/FOSB	29
BP	GO:0045785	positive regulation of cell adhesion	49/854	403/18670	4.32273e-10	9.36051e-08	7.20644e-08	CCN1/FGG/ZP3/FGA/CAV1/CCL2/THY1/CD83/SHH/VEGFA/EGR3/FN1/RUNX1/LGALS1/APOA1/VTN/GLI2/CD44/ICAM1/HHLA2/NR4A3/CDH13/COL16A1/SFRP2/CD1D/LILRB2/ADGRG1/EPHA1/CCDC80/EDIL3/ANXA1/ITGA5/EPB41L4B/FOXA2/FSTL3/EFNB2/COL8A1/HYAL1/TGFB2/VNN1/PAK3/SMAD7/IGFBP2/EFNB1/CCL19/TNFSF18/HLA-DMB/TGM2/IGF1	49
BP	GO:0001101	response to acid chemical	44/854	343/18670	6.29232e-10	1.27298e-07	9.80041e-08	AKR1C2/RBP4/BRINP1/GCLM/CCN2/AKR1C1/COL3A1/PTGS2/GLDC/COL1A1/ABCC2/EPHA3/ASS1/APOB/COL1A2/AKR1C3/NQO1/VEGFA/CASTOR1/AKR1C4/PTK7/MMP2/PON1/SPARC/ICAM1/CTSH/COL16A1/IGFBP7/COL5A2/LRAT/GJB2/GCLC/SERPINF1/DUSP1/PPARGC1A/ALDH1A2/PDGFRB/GLRB/COL4A1/EGR1/PDK4/IGFBP2/ZEB1/CCL19	44
BP	GO:0060840	artery development	22/854	100/18670	6.36859e-10	1.27298e-07	9.80041e-08	COL3A1/COMP/APOB/LOXL1/SHH/VEGFA/EYA1/PRICKLE1/LTBP1/HPGD/DLL4/PDGFRB/EFNB2/ROBO2/ROBO1/TGFB2/LRP2/JAG1/SMAD7/MYH10/LRP1/NOTCH3	22
BP	GO:0030199	collagen fibril organization	16/854	54/18670	1.31567e-09	2.53242e-07	1.94965e-07	COL3A1/COL1A1/COMP/COL1A2/MMP11/GREM1/COL14A1/LUM/COL5A1/PXDN/SFRP2/COL5A2/TGFB2/ADAMTS2/TNXB/AEBP1	16
BP	GO:0006690	icosanoid metabolic process	23/854	114/18670	1.59626e-09	2.96277e-07	2.28097e-07	AKR1C2/PTGR1/CYP1A1/CYP2B6/PTGS2/ATP6V1B1/GSTA1/CBR1/DPEP1/AKR1C3/CYP4F12/AKR1C4/MGST2/ALOX15B/PON1/CYP4F3/GGT1/PON3/HPGD/ANXA1/CYP2C8/CYP2C9/CYP2A6	23
BP	GO:0050673	epithelial cell proliferation	50/854	434/18670	1.85333e-09	3.32129e-07	2.55698e-07	FAP/ANG/NGFR/LGR5/CAV1/COL8A2/CCL2/APLNR/THBS1/ECM1/SHH/VEGFA/EYA1/EGR3/NR4A1/CPB2/HPN/CDH3/EREG/FGF7/APOH/APOA1/SPARC/NR4A3/CD109/CDH13/SFRP2/SCG2/SCARB1/MARVELD3/XDH/JCAD/SERPINF1/ESRP2/DLL4/ZFP36L1/ALDH1A2/EFNB2/COL8A1/ROBO1/HYAL1/TGFB2/TGFA/HGF/CDKN2B/LRG1/THBS4/SULF2/FGF10/IGF1	50
BP	GO:0001655	urogenital system development	42/854	330/18670	1.9691e-09	3.41113e-07	2.62615e-07	RBP4/CRLF1/LGR5/WWTR1/ASS1/BASP1/SHH/VEGFA/EYA1/AGT/EPHB3/ALOX15B/GLI2/CTSH/GCNT3/SOX17/HPGD/ANXA1/SERPINF1/SDC1/FAT4/HEYL/FSTL3/ALDH1A2/PDGFRB/EFNB2/CA2/ROBO2/TGFB2/COL4A1/JAG1/EGR1/DCHS1/SMAD7/CRIP1/TCF21/SULF2/FGF10/ACTA2/NOTCH3/TBX18/TREX1	42
BP	GO:0006631	fatty acid metabolic process	46/854	383/18670	2.21944e-09	3.63009e-07	2.79473e-07	UGT1A8/AKR1C2/PTGR1/ABHD3/CYP1A1/CYP2B6/PTGS2/ATP6V1B1/PHYH/CAV1/GSTA1/CBR1/PLIN5/AKR1C3/ALDH3A2/GLYATL2/ABCD3/ABHD2/CYP4F12/AKR1C4/CES1/ALOX15B/PON1/FADS2/NR4A3/BAAT/CYP4F3/ELOVL7/PCK2/GGT1/LIPG/PON3/HPGD/ELOVL6/ANXA1/TYRP1/CYP4F11/CYP2C8/PPARGC1A/CYP2C9/FA2H/PDK4/CYP2A6/SLC27A2/MSMO1/TREX1	46
BP	GO:0006066	alcohol metabolic process	45/854	370/18670	2.23519e-09	3.63009e-07	2.79473e-07	AKR1C2/RBP4/AKR1C1/G6PD/SORD/ADH1A/CYP1A1/IDH1/AKR1B10/ALDH1A1/SULT2B1/TM7SF2/APOB/MOXD1/AKR1C3/GOT1/ALDH3A2/AKR1B15/SULT1C4/ADH1C/AKR1C4/NR0B2/CES1/BCO1/ACO2/CYP51A1/PON1/APOA1/SPR/TTR/PLCG2/CHKA/PCK2/SCARB1/RDH12/LRAT/HMGCS2/LEPR/ELOVL6/ALDH1A2/NPC1L1/DEGS2/MSMO1/DKK3/IGF1	45
BP	GO:1901568	fatty acid derivative metabolic process	28/854	167/18670	2.37518e-09	3.74054e-07	2.87976e-07	AKR1C2/PTGR1/CYP1A1/CYP2B6/PTGS2/ATP6V1B1/GSTA1/CBR1/DPEP1/AKR1C3/CYP4F12/AKR1C4/MGST2/ALOX15B/PON1/CYP4F3/ELOVL7/GGT1/PON3/HMGCS2/HPGD/ELOVL6/ANXA1/TYRP1/CYP2C8/BDH1/CYP2C9/CYP2A6	28
BP	GO:0015711	organic anion transport	54/854	495/18670	2.95148e-09	4.51142e-07	3.47324e-07	CCK/PLIN2/SLC51A/SLC38A3/AKR1C1/SLC22A25/SLC17A1/CA4/SLCO1B1/SLC38A5/ABCC2/SLC26A3/THBS1/LCN12/RGS4/ABCD3/SLC6A19/AGT/AKR1C4/ATP10B/SLC13A1/XKR9/APOA1/GRM7/ATP8B2/SLC7A11/PLA2G2A/SCARB1/RIMS1/SLC43A1/CA9/SLC25A25/ABCB1/PLSCR3/SLC25A24/SLC1A1/ANXA1/SLC9A3R1/SLC16A13/STARD5/SLC10A2/CA2/SLC6A9/LRP2/ABCC3/ANO3/SLC13A2/SLC27A2/SLC37A4/ACE2/SLC3A1/PPFIA2/SLC36A2/CA13	54
BP	GO:0005996	monosaccharide metabolic process	38/854	287/18670	3.86752e-09	5.74271e-07	4.42118e-07	UGT1A9/UGT1A8/UGT1A7/RBP4/UGT1A3/UGT1A6/PGD/UGT2B11/G6PD/SORD/PHLDA2/UGT1A4/UGT2B28/TKT/CYB5A/UGT1A1/ALDH1A1/GPI/UGT2B17/UGT1A5/GOT1/FUT9/UGT2B7/PCK2/ALDOB/SLC2A3/GCLC/LEPR/UGT2A3/C1QTNF1/FOXA2/UGT2B15/PPARGC1A/ATF3/PDK4/SLC37A4/GALE/IGF1	38
BP	GO:0033559	unsaturated fatty acid metabolic process	22/854	110/18670	4.28561e-09	6.13479e-07	4.72304e-07	AKR1C2/PTGR1/CYP1A1/CYP2B6/PTGS2/ATP6V1B1/GSTA1/CBR1/AKR1C3/GLYATL2/CYP4F12/AKR1C4/ALOX15B/FADS2/CYP4F3/ELOVL7/HPGD/ELOVL6/ANXA1/CYP2C8/CYP2C9/CYP2A6	22
BP	GO:0019748	secondary metabolic process	17/854	66/18670	4.36766e-09	6.13479e-07	4.72304e-07	UGT1A8/AKR1C2/UGT1A7/AKR1C1/CYP1A1/AKR1B10/ABCC2/AKR1C3/AKR1C4/CDH3/SLC7A11/AKR7A3/PON3/TYRP1/ACMSD/CYP2A6/FMO1	17
BP	GO:0072001	renal system development	38/854	293/18670	6.8989e-09	9.43515e-07	7.26391e-07	RBP4/CRLF1/LGR5/WWTR1/ASS1/BASP1/SHH/VEGFA/EYA1/AGT/GLI2/CTSH/GCNT3/SOX17/HPGD/SERPINF1/SDC1/FAT4/HEYL/FSTL3/ALDH1A2/PDGFRB/EFNB2/CA2/ROBO2/TGFB2/COL4A1/JAG1/EGR1/DCHS1/SMAD7/TCF21/SULF2/FGF10/ACTA2/NOTCH3/TBX18/TREX1	38
BP	GO:0051384	response to glucocorticoid	25/854	146/18670	1.09494e-08	1.45908e-06	1.12332e-06	TAT/GHRHR/PTGS2/ABCC2/UGT1A1/ASS1/GOT1/ALDH3A1/PPARGC1B/STC1/SPARC/ICAM1/PCK2/IGFBP7/IL1RN/SSTR5/GJB2/ANXA1/SERPINF1/HSD11B2/SDC1/ZFP36L1/DUSP1/IGFBP2/FOSB	25
BP	GO:1900046	regulation of hemostasis	18/854	80/18670	1.57063e-08	2.04064e-06	1.57105e-06	FAP/FGG/FGA/SERPINE1/CAV1/SERPINE2/COMP/THBS1/F2R/PLG/CPB2/APOH/VTN/F2/C1QTNF1/FOXA2/F2RL1/TSPAN8	18
BP	GO:0002576	platelet degranulation	23/854	128/18670	1.64641e-08	2.08693e-06	1.60668e-06	FGG/TIMP1/ALB/FGA/SERPINE1/EGF/THBS1/ECM1/PLG/VEGFA/FN1/LHFPL2/APOH/APOA1/SPARC/CD109/TTN/TGFB3/RAB27B/TGFB2/HGF/F5/IGF1	23
BP	GO:0042572	retinol metabolic process	13/854	41/18670	1.87677e-08	2.32228e-06	1.78787e-06	RBP4/ADH1A/CYP1A1/AKR1B10/ALDH1A1/AKR1C3/AKR1B15/ADH1C/BCO1/TTR/RDH12/LRAT/ALDH1A2	13
BP	GO:0045216	cell-cell junction organization	28/854	185/18670	2.43472e-08	2.94262e-06	2.26545e-06	CDH18/ANG/CAV1/F2R/PERP/CDH2/VEGFA/AGT/PARD6B/CDH11/RUNX1/CDH3/PATJ/CDH13/MARVELD3/GJB2/TGFB3/CTNND2/F11R/CXADR/ANK2/UGT8/TGFB2/F2RL1/CRB3/SMAD7/ACE2/TRPV4	28
BP	GO:0035904	aorta development	15/854	58/18670	3.34824e-08	3.95473e-06	3.04466e-06	COL3A1/LOXL1/EYA1/PRICKLE1/LTBP1/DLL4/PDGFRB/EFNB2/ROBO2/ROBO1/TGFB2/LRP2/JAG1/MYH10/LRP1	15
BP	GO:0050678	regulation of epithelial cell proliferation	43/854	378/18670	3.70875e-08	4.2832e-06	3.29754e-06	ANG/NGFR/CAV1/CCL2/APLNR/THBS1/ECM1/SHH/VEGFA/EYA1/EGR3/NR4A1/CPB2/HPN/CDH3/EREG/FGF7/APOH/SPARC/NR4A3/CD109/CDH13/SFRP2/SCG2/MARVELD3/XDH/JCAD/SERPINF1/ESRP2/DLL4/ZFP36L1/ALDH1A2/EFNB2/ROBO1/HYAL1/TGFB2/TGFA/CDKN2B/LRG1/THBS4/SULF2/FGF10/IGF1	43
BP	GO:0032355	response to estradiol	23/854	134/18670	4.02188e-08	4.54385e-06	3.49821e-06	CCN2/PTGS2/COL1A1/UGT1A1/ASS1/APOB/NQO1/ESRRA/AGT/CRYAB/ENDOG/GGT1/GJB2/HPGD/ANXA1/DUSP1/PPARGC1A/ALDH1A2/PDGFRB/PENK/IGFBP2/MAP1B/FGF10	23
BP	GO:0031638	zymogen activation	14/854	53/18670	7.17769e-08	7.93669e-06	6.11028e-06	FGG/FGA/SERPINE1/SERPINE2/THBS1/PERP/H2BC1/CPB2/HPN/APOH/CTSH/GGT1/PRSS3/C1R	14
BP	GO:0030193	regulation of blood coagulation	17/854	79/18670	7.92819e-08	8.4592e-06	6.51254e-06	FAP/FGG/FGA/SERPINE1/CAV1/SERPINE2/THBS1/F2R/PLG/CPB2/APOH/VTN/F2/C1QTNF1/FOXA2/F2RL1/TSPAN8	17
BP	GO:0022407	regulation of cell-cell adhesion	44/854	402/18670	7.97577e-08	8.4592e-06	6.51254e-06	LGALS9C/FGG/ZP3/FGA/CAV1/SERPINE2/ASS1/CCL2/B4GALNT2/PLG/THY1/CD83/SHH/VEGFA/LGALS9B/EGR3/EPHB3/RUNX1/LGALS1/APOA1/GLI2/CD44/ICAM1/HHLA2/NR4A3/CD1D/IL1RN/LILRB2/ANXA1/C1QTNF1/FOXA2/FSTL3/EFNB2/VNN1/JAG1/PAK3/SMAD7/IGFBP2/EFNB1/CCL19/SWAP70/HLA-DMB/TRPV4/IGF1	44
BP	GO:1900047	negative regulation of hemostasis	14/854	54/18670	9.28531e-08	9.65115e-06	7.4302e-06	FAP/FGG/FGA/SERPINE1/SERPINE2/COMP/THBS1/PLG/CPB2/APOH/VTN/F2/C1QTNF1/TSPAN8	14
BP	GO:0006869	lipid transport	42/854	380/18670	1.20092e-07	1.22377e-05	9.42149e-06	RBP4/PLIN2/SLC51A/AKR1C1/CAV1/SLCO1B1/ABCC2/EGF/INHBA/APOB/THBS1/LCN12/ABCD3/SHH/AGT/AKR1C4/CES1/SPNS2/ATP10B/ABCA13/SPP1/APOH/XKR9/PON1/APOA1/ATP8B2/CHKA/PLA2G2A/SCARB1/LIPG/LRAT/ABCB1/PLSCR3/ANXA1/C1QTNF1/STARD5/SLC10A2/ABCC3/ANO3/SLC27A2/NPC1L1/LRP1	42
BP	GO:0046942	carboxylic acid transport	38/854	331/18670	1.81863e-07	1.81758e-05	1.39932e-05	CCK/PLIN2/SLC51A/SLC38A3/AKR1C1/SLC17A1/SLCO1B1/SLC38A5/ABCC2/SLC26A3/THBS1/LCN12/RGS4/ABCD3/SLC6A19/AGT/AKR1C4/SLC13A1/GRM7/SLC7A11/PLA2G2A/RIMS1/SLC43A1/SLC1A1/ANXA1/SLC9A3R1/SLC16A13/STARD5/SLC10A2/SLC6A9/LRP2/ABCC3/SLC13A2/SLC27A2/ACE2/SLC3A1/PPFIA2/SLC36A2	38
BP	GO:0090287	regulation of cellular response to growth factor stimulus	35/854	292/18670	1.95361e-07	1.89698e-05	1.46045e-05	CCN1/PEG10/CAV1/THBS1/GOT1/VEGFA/AGT/GREM1/SFRP4/VTN/CD109/SFRP2/HHEX/TGFB3/XDH/LTBP1/ADGRA2/JCAD/FSTL1/ITGA5/FSTL3/NBL1/ROBO1/LRP2/HHIP/CDKN2B/SMAD7/RASL11B/LRG1/ZEB1/DKK3/HTRA3/SULF2/HSPA1A/FGF10	35
BP	GO:0048839	inner ear development	27/854	192/18670	2.02722e-07	1.89698e-05	1.46045e-05	LIN7A/LGR5/ATP6V1B1/SHH/EYA1/PTK7/HPN/GJB6/GLI2/CTHRC1/FRZB/SPARC/GABRB3/ADGRV1/NR4A3/GJB2/TGFB3/SLC9A3R1/FAT4/PDGFRB/ROR2/TGFB2/JAG1/DCHS1/TPRN/ZEB1/FGF10	27
BP	GO:0050731	positive regulation of peptidyl-tyrosine phosphorylation	27/854	192/18670	2.02722e-07	1.89698e-05	1.46045e-05	CCK/CRLF1/HTR2A/ALKAL2/EGF/SOCS3/VEGFA/AGT/TSLP/GREM1/CTF1/EREG/FGF7/VTN/STAP2/CD44/ICAM1/BDNF/ADRA2A/ITGA5/TGFA/HGF/THBS4/TNFSF18/NOX4/FGF10/IGF1	27
BP	GO:0050818	regulation of coagulation	17/854	84/18670	2.04409e-07	1.89698e-05	1.46045e-05	FAP/FGG/FGA/SERPINE1/CAV1/SERPINE2/THBS1/F2R/PLG/CPB2/APOH/VTN/F2/C1QTNF1/FOXA2/F2RL1/TSPAN8	17
BP	GO:0015849	organic acid transport	38/854	333/18670	2.12412e-07	1.93667e-05	1.491e-05	CCK/PLIN2/SLC51A/SLC38A3/AKR1C1/SLC17A1/SLCO1B1/SLC38A5/ABCC2/SLC26A3/THBS1/LCN12/RGS4/ABCD3/SLC6A19/AGT/AKR1C4/SLC13A1/GRM7/SLC7A11/PLA2G2A/RIMS1/SLC43A1/SLC1A1/ANXA1/SLC9A3R1/SLC16A13/STARD5/SLC10A2/SLC6A9/LRP2/ABCC3/SLC13A2/SLC27A2/ACE2/SLC3A1/PPFIA2/SLC36A2	38
BP	GO:0032963	collagen metabolic process	20/854	115/18670	2.44965e-07	2.19497e-05	1.68986e-05	FAP/CCN2/COL1A1/P3H3/F2R/COL1A2/GOT1/MMP23B/MMP11/MMP2/F2/COL5A1/SMPD3/TGFB3/PDGFRB/RCN3/ADAMTS2/TNXB/KLK6/VIM	20
BP	GO:0050730	regulation of peptidyl-tyrosine phosphorylation	32/854	256/18670	2.50626e-07	2.20521e-05	1.69774e-05	CCK/CRLF1/HTR2A/ALKAL2/GPRC5A/CAV1/EGF/SPINK1/THY1/SOCS3/VEGFA/AGT/TSLP/GREM1/CTF1/EREG/FGF7/VTN/STAP2/CD44/ICAM1/BDNF/SFRP2/ADRA2A/ITGA5/TGFA/HGF/THBS4/TNFSF18/NOX4/FGF10/IGF1	32
BP	GO:0007178	transmembrane receptor protein serine/threonine kinase signaling pathway	39/854	349/18670	2.54918e-07	2.20521e-05	1.69774e-05	CCN1/PEG10/COL3A1/WWTR1/BMP3/CAV1/INHBA/COMP/THBS1/COL1A2/GOT1/SHH/GREM1/SFRP4/SMPD3/CD109/SFRP2/TGFB3/LTBP1/LTBP2/F11R/HPGD/FSTL1/FSTL3/ROR2/NBL1/TGFB2/LRP2/EGR1/CDKN2B/SMAD7/RASL11B/LRG1/ZEB1/DKK3/HTRA3/HSPA1A/FGF10/VIM	39
BP	GO:0018108	peptidyl-tyrosine phosphorylation	40/854	363/18670	2.59887e-07	2.20521e-05	1.69774e-05	CCK/CRLF1/HTR2A/ALKAL2/GPRC5A/CAV1/EGF/EPHA3/SPINK1/THY1/SOCS3/VEGFA/AGT/TSLP/GREM1/EPHB3/CTF1/EREG/FGF7/VTN/STAP2/CD44/ICAM1/BDNF/TTN/SFRP2/ADRA2A/EPHA1/ITGA5/STYK1/PDGFRB/ROR2/EFEMP1/TGFA/HGF/THBS4/TNFSF18/NOX4/FGF10/IGF1	40
BP	GO:0051592	response to calcium ion	23/854	148/18670	2.63081e-07	2.20521e-05	1.69774e-05	FGG/FGA/CAV1/DPEP1/THBS1/AKR1C3/HOMER1/ENDOG/SPARC/ADGRV1/SYT8/TTN/JUND/RASGRP2/SLC25A24/SDC1/DUSP1/TRPV6/CPNE2/JUNB/PENK/FOSB/SYT13	23
BP	GO:0007584	response to nutrient	29/854	219/18670	2.6838e-07	2.21393e-05	1.70445e-05	GCLM/CYP1A1/PTGS2/COL1A1/UGT1A1/ASS1/AKR1C3/PHEX/NQO1/SLC6A19/ALDH3A1/CASTOR1/STC2/SPP1/STC1/APOA1/SPARC/CXCL10/SFRP2/TNFRSF11B/LIPG/LRAT/GCLC/FOXA2/ALDH1A2/CDKN2B/PENK/IGFBP2/MAP1B	29
BP	GO:0018212	peptidyl-tyrosine modification	40/854	366/18670	3.22872e-07	2.58898e-05	1.99319e-05	CCK/CRLF1/HTR2A/ALKAL2/GPRC5A/CAV1/EGF/EPHA3/SPINK1/THY1/SOCS3/VEGFA/AGT/TSLP/GREM1/EPHB3/CTF1/EREG/FGF7/VTN/STAP2/CD44/ICAM1/BDNF/TTN/SFRP2/ADRA2A/EPHA1/ITGA5/STYK1/PDGFRB/ROR2/EFEMP1/TGFA/HGF/THBS4/TNFSF18/NOX4/FGF10/IGF1	40
BP	GO:0006979	response to oxidative stress	46/854	451/18670	3.23809e-07	2.58898e-05	1.99319e-05	TAT/GCLM/G6PD/MGST1/IDH1/PTGS2/COL1A1/ABCC2/DPEP1/AKR1C3/NQO1/SOD3/STC2/SGK2/PPARGC1B/MMP2/DUOX2/CRYAB/ENDOG/TXN/NR4A3/SMPD3/SLC7A11/GPX2/PXDN/SRXN1/GJB2/SLC25A24/GCLC/ANXA1/SDC1/DUSP1/PPARGC1A/PDGFRB/HYAL1/VNN1/HGF/MSRB3/PENK/MCTP1/CCL19/NOX4/HSPA1B/HSPA1A/TREX1/MGAT3	46
BP	GO:0034329	cell junction assembly	43/854	409/18670	3.44326e-07	2.71131e-05	2.08737e-05	LRTM1/CDH18/CAV1/EPHA3/THBS1/GAP43/THY1/CDH2/VEGFA/AGT/LINGO2/PARD6B/EPHB3/FN1/CDH11/RUNX1/CDH3/PATJ/GABRB3/BDNF/CDH13/THBS2/COL16A1/MARVELD3/GJB2/NRCAM/CTNND2/F11R/ITGA5/ANK2/EFNB2/ROBO2/FBLIM1/UGT8/CRB3/SMAD7/LRRN1/ADGRF1/MAP1B/ACE2/LRP1/PCLO/TRPV4	43
BP	GO:0072511	divalent inorganic cation transport	48/854	486/18670	4.64888e-07	3.54865e-05	2.73203e-05	HTR2A/CCN2/CACNA2D3/G6PD/PTGS2/CAV1/ABCC2/SLC30A2/EGF/CCL2/SPINK1/LPAR3/APLNR/F2R/THY1/RGS4/CACNA1C/AGT/TMEM163/STC2/HOMER1/PKD1L1/STC1/F2/ICAM1/PLCG2/CXCL10/TRPM3/CXCR4/ADRA2A/NIPAL1/SLC25A25/LILRB2/CACNB1/TRPV3/ANK2/TCN2/PDGFRB/TRPV6/TMEM37/RRAD/EHD3/SLC30A10/CCL19/NCS1/NALCN/BIN1/TRPV4	48
BP	GO:0006575	cellular modified amino acid metabolic process	26/854	188/18670	4.72706e-07	3.54865e-05	2.73203e-05	GCLM/GSTA2/G6PD/ERO1B/DIO2/MGST1/IDH1/GSTA1/CKMT2/DPEP1/GGCT/ASS1/FOLH1/NAT8/DUOXA2/BBOX1/MGST2/DUOX2/HPN/SLC7A11/PLA2G2A/GGT1/CKMT1B/GCLC/VNN1/CKMT1A	26
BP	GO:0032496	response to lipopolysaccharide	37/854	330/18670	4.7534e-07	3.54865e-05	2.73203e-05	AICDA/CYP1A1/MGST1/PTGS2/SERPINE1/SELE/ABCC2/UGT1A1/ASS1/CCL2/APOB/F2R/LOXL1/MGST2/GJB6/SPARC/ICAM1/PLCG2/CXCL10/GGT1/SCARB1/JUND/IL1RN/GJB2/LTF/LILRB2/PLSCR3/HPGD/SLPI/PPARGC1A/JUNB/PALM3/PENK/FMO1/CXCL1/FGF10/VIM	37
BP	GO:0006081	cellular aldehyde metabolic process	14/854	61/18670	4.77979e-07	3.54865e-05	2.73203e-05	AKR1C1/IDH1/TKT/ALDH1A1/AKR1C3/ALDH3A2/ALDH3A1/BCO1/ALDOB/AKR7A3/BCO2/ALDH1A2/AGXT2/DKK3	14
BP	GO:0010876	lipid localization	43/854	415/18670	5.12664e-07	3.75255e-05	2.88901e-05	RBP4/PLIN2/SLC51A/AKR1C1/CAV1/SLCO1B1/ABCC2/EGF/INHBA/PLIN5/APOB/THBS1/LCN12/ABCD3/SHH/AGT/AKR1C4/CES1/SPNS2/ATP10B/ABCA13/SPP1/APOH/XKR9/PON1/APOA1/ATP8B2/CHKA/PLA2G2A/SCARB1/LIPG/LRAT/ABCB1/PLSCR3/ANXA1/C1QTNF1/STARD5/SLC10A2/ABCC3/ANO3/SLC27A2/NPC1L1/LRP1	43
BP	GO:0030195	negative regulation of blood coagulation	13/854	53/18670	5.38335e-07	3.86924e-05	2.97884e-05	FAP/FGG/FGA/SERPINE1/SERPINE2/THBS1/PLG/CPB2/APOH/VTN/F2/C1QTNF1/TSPAN8	13
BP	GO:0001822	kidney development	33/854	278/18670	5.43496e-07	3.86924e-05	2.97884e-05	CRLF1/WWTR1/ASS1/BASP1/SHH/VEGFA/EYA1/AGT/GLI2/CTSH/GCNT3/HPGD/SERPINF1/SDC1/FAT4/HEYL/FSTL3/ALDH1A2/PDGFRB/EFNB2/CA2/ROBO2/TGFB2/JAG1/EGR1/DCHS1/SMAD7/TCF21/SULF2/FGF10/ACTA2/NOTCH3/TREX1	33
BP	GO:0048608	reproductive structure development	44/854	431/18670	5.69835e-07	4.00194e-05	3.081e-05	RBP4/CCN1/ZP3/PHLDA2/ANG/MGST1/IDH1/PTGS2/DMRTA1/SERPINE2/INHBA/AKR1C3/BASP1/SOCS3/SHH/VEGFA/NRK/STC2/ALOX15B/EREG/SPP1/STC1/GLI2/ICAM1/SFRP2/GJB5/GJB2/ADGRG1/ANXA1/SERPINF1/SDC1/ZFP36L1/FSTL3/PDGFRB/ROR2/ROBO2/TGFB2/LRP2/MDFI/JUNB/SYCP2/CRIP1/TCF21/FGF10	44
BP	GO:0060485	mesenchyme development	33/854	279/18670	5.90073e-07	4.08881e-05	3.14788e-05	WWTR1/COL1A1/EPHA3/FGF19/BASP1/SHH/PTK7/GREM1/FN1/HPN/PHLDB1/FRZB/SEMA5B/SFRP2/FAM83D/TGFB3/FOXA2/ZFP36L1/HEYL/ALDH1A2/PDGFRB/ROBO2/ROBO1/TGFB2/JAG1/HGF/DCHS1/SMAD7/EFNB1/SEMA6C/TCF21/FGF10/ACTA2	33
BP	GO:2001236	regulation of extrinsic apoptotic signaling pathway	23/854	155/18670	6.12502e-07	4.18839e-05	3.22454e-05	FGG/GCLM/ITPRIP/FGA/SERPINE1/CAV1/INHBA/THBS1/EYA1/AGT/LMNA/ICAM1/SFRP2/SCG2/GCLC/DEPTOR/ATF3/HGF/HSPA1B/HSPA1A/FGF10/PEA15/IGF1	23
BP	GO:0048771	tissue remodeling	25/854	179/18670	6.48661e-07	4.37804e-05	3.37055e-05	TIMP1/HTR1B/CAV1/BGN/F2R/PLG/AGT/PPARGC1B/GREM1/MMP2/SPP1/TMEM119/CTHRC1/TNFRSF11B/TGFB3/LEPR/ANXA1/DLL4/CA2/JAG1/PDK4/THBS4/NOX4/TGM2/FGF10	25
BP	GO:0007568	aging	36/854	321/18670	6.73672e-07	4.47738e-05	3.44704e-05	HTR2A/TIMP1/GHRHR/GCLM/CCN2/CYP1A1/PTGS2/SERPINE1/ASS1/COMP/NQO1/ALDH3A1/AGT/LMNA/CRYAB/GJB6/ENDOG/ICAM1/TFCP2L1/JUND/TIMP2/GJB2/TGFB3/GCLC/SERPINF1/PPARGC1A/PDGFRB/CDKN2B/SLC30A10/PENK/IGFBP2/LRP1/NOX4/NUAK1/COL4A2/TREX1	36
BP	GO:0048732	gland development	44/854	434/18670	6.89226e-07	4.47738e-05	3.44704e-05	GHRHR/CYP1A1/CAV1/SERPINE2/UGT1A1/EGF/ASS1/SHH/VEGFA/CPB2/EPHB3/HPN/ALOX15B/FGF7/ACO2/APOA1/VTN/GLI2/FRZB/BAAT/PCK2/TFCP2L1/TGFB3/LBH/XDH/ANXA1/SERPINF1/SLC9A3R1/ESRP2/AK4/FSTL3/MSN/ALDH1A2/ROBO1/TGFB2/HGF/COBL/FA2H/CRIP1/DKK3/TCF21/TGM2/SULF2/FGF10	44
BP	GO:0061458	reproductive system development	44/854	434/18670	6.89226e-07	4.47738e-05	3.44704e-05	RBP4/CCN1/ZP3/PHLDA2/ANG/MGST1/IDH1/PTGS2/DMRTA1/SERPINE2/INHBA/AKR1C3/BASP1/SOCS3/SHH/VEGFA/NRK/STC2/ALOX15B/EREG/SPP1/STC1/GLI2/ICAM1/SFRP2/GJB5/GJB2/ADGRG1/ANXA1/SERPINF1/SDC1/ZFP36L1/FSTL3/PDGFRB/ROR2/ROBO2/TGFB2/LRP2/MDFI/JUNB/SYCP2/CRIP1/TCF21/FGF10	44
BP	GO:0030111	regulation of Wnt signaling pathway	39/854	363/18670	6.99931e-07	4.49079e-05	3.45736e-05	LGR5/WWTR1/CAV1/COL1A1/EGF/CDH2/SHH/PSMA6/PTK7/GREM1/RUNX1/CDH3/SFRP4/PLEKHA4/CTHRC1/ALPK2/FRZB/TRABD2B/PRICKLE1/NKD2/SFRP2/SOX17/HHEX/CTNND2/DEPDC1B/ADGRA2/NFATC1/SLC9A3R1/ROR2/MDFI/EGR1/IGFBP2/HECW1/APCDD1/DKK3/LRP1/SULF2/FGF10/TBX18	39
BP	GO:0051186	cofactor metabolic process	45/854	449/18670	7.09603e-07	4.49732e-05	3.46239e-05	AKR1C2/ABCB6/GCLM/AKR1C1/GSTA2/G6PD/UGT1A4/CYP1A1/MGST1/IDH1/PTGS2/CYB5A/AKR1B10/GSTA1/AMBP/UGT1A1/DPEP1/GGCT/AKR1C3/FOLH1/NAT8/DUOXA2/AKR1C4/MGST2/DUOX2/SPR/BAAT/HMBS/SLC7A11/PXDN/ELOVL7/GGT1/SLC2A3/PRSS3/HMGCS2/GCLC/ELOVL6/DBI/ACMSD/CYP4F11/TCN2/VNN1/PDK4/GCHFR/AHCYL2	45
BP	GO:0031639	plasminogen activation	9/854	25/18670	8.85748e-07	5.54607e-05	4.26979e-05	FGG/FGA/SERPINE1/SERPINE2/THBS1/H2BC1/CPB2/HPN/APOH	9
BP	GO:0019216	regulation of lipid metabolic process	42/854	410/18670	9.39855e-07	5.8148e-05	4.47668e-05	UGT1A9/UGT1A8/CCN1/PLIN2/HTR2A/ZP3/CYP1A1/EEF1A2/ME1/IDH1/PTGS2/CAV1/UGT1A1/PLIN5/TM7SF2/APOB/ANGPTL4/FGF19/AKR1C3/SOCS3/AGT/CYP51A1/APOA1/F2/NPAS2/AADAC/NR4A3/SMPD3/SCARB1/ADRA2A/IGFBP7/HMGCS2/ELOVL6/ANXA1/PPARGC1A/PDGFRB/EGR1/PDK4/CCL19/DKK3/FHL2/TREX1	42
BP	GO:0061041	regulation of wound healing	22/854	148/18670	1.03812e-06	6.14952e-05	4.73437e-05	FAP/FGG/FGA/SERPINE1/CAV1/SERPINE2/THBS1/F2R/PLG/CPB2/DUOX2/APOH/VTN/F2/CD109/CXCR4/ADRA2A/ANXA1/C1QTNF1/FOXA2/F2RL1/TSPAN8	22
BP	GO:2001237	negative regulation of extrinsic apoptotic signaling pathway	18/854	104/18670	1.04397e-06	6.14952e-05	4.73437e-05	FGG/GCLM/ITPRIP/FGA/SERPINE1/THBS1/EYA1/LMNA/ICAM1/SFRP2/SCG2/GCLC/HGF/HSPA1B/HSPA1A/FGF10/PEA15/IGF1	18
BP	GO:0051917	regulation of fibrinolysis	7/854	14/18670	1.05821e-06	6.14952e-05	4.73437e-05	FAP/SERPINE1/THBS1/PLG/CPB2/APOH/F2	7
BP	GO:0046394	carboxylic acid biosynthetic process	38/854	355/18670	1.06315e-06	6.14952e-05	4.73437e-05	ABHD3/CYP1A1/VCAN/PTGS2/CBR1/EGF/ASS1/BGN/FGF19/AKR1C3/FOLH1/GOT1/ABCD3/ABHD2/AKR1C4/MGST2/ALOX15B/FADS2/CHST12/SMPD3/BAAT/CRABP2/ELOVL7/GGT1/LIPG/HPGD/ELOVL6/ANXA1/ACMSD/CYP2C8/ALDH1A2/HYAL1/AGXT2/ASL/CYP2C9/FA2H/PDK4/SLC27A2	38
BP	GO:0006749	glutathione metabolic process	13/854	56/18670	1.06476e-06	6.14952e-05	4.73437e-05	GCLM/GSTA2/G6PD/MGST1/IDH1/GSTA1/DPEP1/GGCT/NAT8/MGST2/SLC7A11/GGT1/GCLC	13
BP	GO:0061448	connective tissue development	32/854	273/18670	1.06495e-06	6.14952e-05	4.73437e-05	CCN1/TIMP1/CCN2/MEF2D/BMP3/COL1A1/COMP/ECM1/ESRRA/GREM1/COL14A1/LUM/STC1/GLI2/CD44/COL5A1/FRZB/MGP/SMPD3/SFRP2/SLC25A25/PPARGC1A/PDGFRB/ROR2/HYAL1/EFEMP1/EGR1/CRIP1/ZEB1/TRPV4/SULF2/ACTA2	32
BP	GO:0016053	organic acid biosynthetic process	38/854	356/18670	1.13928e-06	6.50644e-05	5.00916e-05	ABHD3/CYP1A1/VCAN/PTGS2/CBR1/EGF/ASS1/BGN/FGF19/AKR1C3/FOLH1/GOT1/ABCD3/ABHD2/AKR1C4/MGST2/ALOX15B/FADS2/CHST12/SMPD3/BAAT/CRABP2/ELOVL7/GGT1/LIPG/HPGD/ELOVL6/ANXA1/ACMSD/CYP2C8/ALDH1A2/HYAL1/AGXT2/ASL/CYP2C9/FA2H/PDK4/SLC27A2	38
BP	GO:0002237	response to molecule of bacterial origin	37/854	343/18670	1.22169e-06	6.9012e-05	5.31308e-05	AICDA/CYP1A1/MGST1/PTGS2/SERPINE1/SELE/ABCC2/UGT1A1/ASS1/CCL2/APOB/F2R/LOXL1/MGST2/GJB6/SPARC/ICAM1/PLCG2/CXCL10/GGT1/SCARB1/JUND/IL1RN/GJB2/LTF/LILRB2/PLSCR3/HPGD/SLPI/PPARGC1A/JUNB/PALM3/PENK/FMO1/CXCL1/FGF10/VIM	37
BP	GO:0060541	respiratory system development	26/854	198/18670	1.29595e-06	7.24198e-05	5.57544e-05	RBP4/CCN2/ASS1/PHEX/BASP1/SHH/VEGFA/MSC/PTK7/FGF7/GLI2/SPARC/SMPD3/CTSH/SLC7A11/TGFB3/ESRP2/FSTL3/ALDH1A2/PDGFRB/HHIP/RCN3/HSD11B1/ADAMTS2/TCF21/FGF10	26
BP	GO:0050819	negative regulation of coagulation	13/854	57/18670	1.32212e-06	7.30962e-05	5.62751e-05	FAP/FGG/FGA/SERPINE1/SERPINE2/THBS1/PLG/CPB2/APOH/VTN/F2/C1QTNF1/TSPAN8	13
BP	GO:0070371	ERK1 and ERK2 cascade	35/854	317/18670	1.38283e-06	7.56483e-05	5.82399e-05	CCN1/HTR2A/FGG/FFAR4/CCN2/PSCA/ALKAL2/CCL15/FGA/EGF/CCL2/FGF19/F2R/AGT/FN1/CD44/ICAM1/CTSH/PLA2G2A/FAM83D/SLC9A3R1/CAVIN3/ZFP36L1/DUSP1/PDGFRB/PTPRR/F2RL1/ATF3/SLC30A10/CCL19/LRP1/NOX4/TRPV4/FGF10/IGF1	35
BP	GO:0048844	artery morphogenesis	15/854	76/18670	1.48096e-06	8.01722e-05	6.17227e-05	COL3A1/COMP/APOB/VEGFA/EYA1/HPGD/DLL4/PDGFRB/EFNB2/TGFB2/LRP2/JAG1/SMAD7/LRP1/NOTCH3	15
BP	GO:0051918	negative regulation of fibrinolysis	6/854	10/18670	1.61393e-06	8.63423e-05	6.6473e-05	SERPINE1/THBS1/PLG/CPB2/APOH/F2	6
BP	GO:0007043	cell-cell junction assembly	20/854	129/18670	1.62816e-06	8.63423e-05	6.6473e-05	CDH18/CAV1/CDH2/AGT/PARD6B/CDH11/RUNX1/CDH3/PATJ/CDH13/MARVELD3/GJB2/CTNND2/F11R/ANK2/UGT8/CRB3/SMAD7/ACE2/TRPV4	20
BP	GO:0070838	divalent metal ion transport	46/854	479/18670	1.75339e-06	9.20441e-05	7.08626e-05	HTR2A/CCN2/CACNA2D3/G6PD/PTGS2/CAV1/SLC30A2/EGF/CCL2/SPINK1/LPAR3/APLNR/F2R/THY1/RGS4/CACNA1C/AGT/TMEM163/STC2/HOMER1/PKD1L1/STC1/F2/ICAM1/PLCG2/CXCL10/TRPM3/CXCR4/ADRA2A/NIPAL1/SLC25A25/LILRB2/CACNB1/TRPV3/ANK2/PDGFRB/TRPV6/TMEM37/RRAD/EHD3/SLC30A10/CCL19/NCS1/NALCN/BIN1/TRPV4	46
BP	GO:0051924	regulation of calcium ion transport	30/854	254/18670	1.96224e-06	0.000101978	7.85102e-05	G6PD/PTGS2/CAV1/EGF/CCL2/SPINK1/LPAR3/APLNR/F2R/THY1/RGS4/CACNA1C/AGT/STC2/HOMER1/STC1/F2/ICAM1/PLCG2/CXCL10/CXCR4/ADRA2A/LILRB2/CACNB1/TRPV3/ANK2/PDGFRB/RRAD/EHD3/BIN1	30
BP	GO:0090092	regulation of transmembrane receptor protein serine/threonine kinase signaling pathway	29/854	241/18670	1.98747e-06	0.000102266	7.87325e-05	CCN1/PEG10/WWTR1/BMP3/CAV1/INHBA/THBS1/GOT1/SHH/GREM1/SFRP4/CD109/SFRP2/TGFB3/LTBP1/FSTL1/FSTL3/NBL1/TGFB2/LRP2/CDKN2B/SMAD7/RASL11B/LRG1/ZEB1/DKK3/HTRA3/HSPA1A/FGF10	29
BP	GO:0022409	positive regulation of cell-cell adhesion	30/854	255/18670	2.12905e-06	0.000108477	8.35143e-05	FGG/ZP3/FGA/CAV1/CCL2/THY1/CD83/SHH/EGR3/RUNX1/LGALS1/GLI2/CD44/ICAM1/HHLA2/NR4A3/CD1D/LILRB2/ANXA1/FOXA2/FSTL3/EFNB2/VNN1/PAK3/SMAD7/IGFBP2/EFNB1/CCL19/HLA-DMB/IGF1	30
BP	GO:0044344	cellular response to fibroblast growth factor stimulus	21/854	143/18670	2.22036e-06	0.000112031	8.62503e-05	GCLM/CCN2/COL1A1/FGF5/CCL2/THBS1/FGF19/GALNT3/EGR3/NR4A1/FGF7/CD44/GCLC/ESRP2/DLL4/FAT4/ZFP36L1/HYAL1/HHIP/SULF2/FGF10	21
BP	GO:1903034	regulation of response to wounding	24/854	179/18670	2.26599e-06	0.000113234	8.71763e-05	FAP/FGG/FGA/SERPINE1/CAV1/SERPINE2/THBS1/F2R/PLG/CPB2/DUOX2/SPP1/APOH/VTN/F2/CD109/CXCR4/ADRA2A/ANXA1/C1QTNF1/FOXA2/F2RL1/LRP1/TSPAN8	24
BP	GO:0031667	response to nutrient levels	47/854	499/18670	2.31751e-06	0.000114706	8.83092e-05	CCK/ALB/GCLM/SLC38A3/G6PD/SORD/CYP1A1/PTGS2/COL1A1/UGT1A1/ASS1/HTR4/AKR1C3/PHEX/NQO1/SLC6A19/ALDH3A1/CASTOR1/STC2/SPP1/STC1/PON1/APOA1/SPARC/ICAM1/CXCL10/NPY/SFRP2/PCK2/TNFRSF11B/LIPG/LRAT/SLC25A25/GCLC/FSTL1/ADSS1/HSD11B2/FOXA2/PPARGC1A/ALDH1A2/ATF3/CDKN2B/PDK4/PENK/IGFBP2/MAP1B/TRPV4	47
BP	GO:0042730	fibrinolysis	9/854	28/18670	2.64546e-06	0.000129702	9.9855e-05	FAP/FGG/FGA/SERPINE1/THBS1/PLG/CPB2/APOH/F2	9
BP	GO:0043583	ear development	27/854	219/18670	2.79773e-06	0.000135886	0.000104615	LIN7A/LGR5/ATP6V1B1/SHH/EYA1/PTK7/HPN/GJB6/GLI2/CTHRC1/FRZB/SPARC/GABRB3/ADGRV1/NR4A3/GJB2/TGFB3/SLC9A3R1/FAT4/PDGFRB/ROR2/TGFB2/JAG1/DCHS1/TPRN/ZEB1/FGF10	27
BP	GO:0042692	muscle cell differentiation	39/854	385/18670	3.0089e-06	0.000144789	0.00011147	G6PD/MYLK3/COMP/RGS4/CDH2/SHH/VEGFA/AGT/KLHL41/HOMER1/LMNA/GREM1/EREG/TMEM119/SCGB3A1/ALPK2/BDNF/CXCL10/TTN/OLFM2/NFATC1/CXADR/SDC1/ANK2/PDGFRB/EFNB2/BOC/LDB3/CFL2/MYORG/EHD2/ZEB1/CSRP1/MYH10/DMPK/BIN1/NOX4/FGF10/IGF1	39
BP	GO:0042448	progesterone metabolic process	7/854	16/18670	3.25403e-06	0.000155149	0.000119445	AKR1C2/CYP17A1/AKR1C1/AKR1C3/AKR1C4/PPARGC1A/EGR1	7
BP	GO:0006694	steroid biosynthetic process	25/854	196/18670	3.51361e-06	0.000166002	0.000127801	CYP17A1/G6PD/TM7SF2/APOB/FGF19/AKR1C3/AKR1B15/AKR1C4/CES1/CYP51A1/APOA1/BAAT/SCARB1/TFCP2L1/IGFBP7/HMGCS2/ELOVL6/HSD11B2/PPARGC1A/EGR1/HSD11B1/SLC27A2/NPC1L1/MSMO1/DKK3	25
BP	GO:0071229	cellular response to acid chemical	26/854	209/18670	3.6017e-06	0.000168631	0.000129825	AKR1C2/BRINP1/GCLM/AKR1C1/COL3A1/COL1A1/EPHA3/ASS1/APOB/COL1A2/AKR1C3/VEGFA/CASTOR1/AKR1C4/PTK7/MMP2/COL16A1/COL5A2/GCLC/SERPINF1/PPARGC1A/ALDH1A2/COL4A1/EGR1/PDK4/ZEB1	26
BP	GO:0015850	organic hydroxy compound transport	30/854	262/18670	3.71557e-06	0.000172409	0.000132734	RBP4/HTR2A/SLC51A/AKR1C1/HTR1B/CAV1/SLCO1B1/ABCC2/EGF/RAB3B/APOB/SHH/AGT/AKR1C4/CES1/SPP1/PON1/APOA1/SYT8/SCARB1/LIPG/ADRA2A/C1QTNF1/STARD5/SLC10A2/ABCC3/SLC5A11/NPC1L1/LRP1/SYT13	30
BP	GO:0030324	lung development	23/854	172/18670	3.83678e-06	0.000176064	0.000135548	RBP4/CCN2/PHEX/SHH/VEGFA/PTK7/FGF7/GLI2/SPARC/SMPD3/CTSH/SLC7A11/TGFB3/ESRP2/FSTL3/ALDH1A2/PDGFRB/HHIP/RCN3/HSD11B1/ADAMTS2/TCF21/FGF10	23
BP	GO:0051346	negative regulation of hydrolase activity	44/854	463/18670	3.8621e-06	0.000176064	0.000135548	TIMP1/ITIH1/NGFR/PTGS2/SERPINE1/AMBP/CHP1/SERPINE2/DPEP1/PLIN5/ANGPTL4/SPINK1/THBS1/ECM1/VEGFA/AGT/DGKI/CRYAB/PPP1R14D/APOA1/VTN/PHACTR3/CD44/ELFN2/CD109/SFRP2/IQGAP2/TIMP2/LTF/PAPLN/LEPR/F11R/ANXA1/SERPINF1/SLPI/SERPINA6/TGFB2/PPP1R1C/HGF/PPP1R36/CST1/GCHFR/BIN1/SPOCK1	44
BP	GO:0030178	negative regulation of Wnt signaling pathway	26/854	210/18670	3.93592e-06	0.000177869	0.000136937	WWTR1/CAV1/CDH2/SHH/PSMA6/GREM1/SFRP4/CTHRC1/ALPK2/FRZB/TRABD2B/PRICKLE1/NKD2/SFRP2/SOX17/NFATC1/SLC9A3R1/ROR2/MDFI/EGR1/IGFBP2/HECW1/APCDD1/DKK3/LRP1/TBX18	26
BP	GO:0006816	calcium ion transport	42/854	434/18670	4.06301e-06	0.00018203	0.000140141	HTR2A/CCN2/CACNA2D3/G6PD/PTGS2/CAV1/EGF/CCL2/SPINK1/LPAR3/APLNR/F2R/THY1/RGS4/CACNA1C/AGT/STC2/HOMER1/PKD1L1/STC1/F2/ICAM1/PLCG2/CXCL10/TRPM3/CXCR4/ADRA2A/SLC25A25/LILRB2/CACNB1/TRPV3/ANK2/PDGFRB/TRPV6/TMEM37/RRAD/EHD3/CCL19/NCS1/NALCN/BIN1/TRPV4	42
BP	GO:0072330	monocarboxylic acid biosynthetic process	28/854	237/18670	4.25399e-06	0.000188957	0.000145474	ABHD3/CYP1A1/VCAN/PTGS2/CBR1/BGN/FGF19/AKR1C3/ABCD3/ABHD2/AKR1C4/ALOX15B/FADS2/CHST12/BAAT/CRABP2/ELOVL7/LIPG/HPGD/ELOVL6/ANXA1/ACMSD/CYP2C8/ALDH1A2/CYP2C9/FA2H/PDK4/SLC27A2	28
BP	GO:0071774	response to fibroblast growth factor	21/854	150/18670	4.82881e-06	0.000212672	0.000163731	GCLM/CCN2/COL1A1/FGF5/CCL2/THBS1/FGF19/GALNT3/EGR3/NR4A1/FGF7/CD44/GCLC/ESRP2/DLL4/FAT4/ZFP36L1/HYAL1/HHIP/SULF2/FGF10	21
BP	GO:0060537	muscle tissue development	40/854	408/18670	5.02288e-06	0.000219361	0.000168881	RBP4/G6PD/COL3A1/MEF2D/CAV1/MYLK3/RGS4/SHH/VEGFA/EYA1/AGT/KLHL41/MSC/HOMER1/LMNA/EGR2/GREM1/ALPK2/TTN/SOX17/PPP1R13L/CXADR/DLL4/HEYL/PPARGC1A/ALDH1A2/PDGFRB/EFNB2/TGFB2/LRP2/ATF3/EGR1/CFL2/SMAD7/MYORG/CSRP1/MYH10/TCF21/NOX4/IGF1	40
BP	GO:0030323	respiratory tube development	23/854	176/18670	5.67938e-06	0.000245964	0.000189362	RBP4/CCN2/PHEX/SHH/VEGFA/PTK7/FGF7/GLI2/SPARC/SMPD3/CTSH/SLC7A11/TGFB3/ESRP2/FSTL3/ALDH1A2/PDGFRB/HHIP/RCN3/HSD11B1/ADAMTS2/TCF21/FGF10	23
BP	GO:0072593	reactive oxygen species metabolic process	31/854	284/18670	6.92821e-06	0.000297569	0.000229092	CCN1/CCN2/G6PD/CYP1A1/PTGS2/CAV1/PLIN5/ASS1/THBS1/AKR1C3/NQO1/DUOXA2/SOD3/AGT/DUOX2/CRYAB/F2/ICAM1/SPR/PXDN/PON3/XDH/BCO2/PDGFRB/F2RL1/AGXT2/PDK4/SLC30A10/GCHFR/ACE2/NOX4	31
BP	GO:0044282	small molecule catabolic process	42/854	445/18670	7.57259e-06	0.00032258	0.000248347	TAT/ABHD3/PGD/AICDA/SORD/CYP1A1/GLDC/PHYH/AKR1B10/CHP1/ALDH1A1/GPI/PLIN5/AKR1C3/GOT1/ALDH3A2/GLYATL2/ABCD3/SULT1C4/ABHD2/CYP4F12/PON1/FUT9/CD44/ENTPD8/CYP4F3/PCK2/SCARB1/ALDOB/ENTPD5/PON3/HGD/PPM1K/ACMSD/TST/CYP4F11/BDH1/HYAL1/AGXT2/SLC27A2/ENTPD1/GALE	42
BP	GO:0061045	negative regulation of wound healing	14/854	76/18670	7.71124e-06	0.000325816	0.000250838	FAP/FGG/FGA/SERPINE1/SERPINE2/THBS1/PLG/CPB2/APOH/VTN/F2/CD109/C1QTNF1/TSPAN8	14
BP	GO:0051591	response to cAMP	16/854	97/18670	7.82895e-06	0.000328121	0.000252613	COL1A1/ASS1/SLC26A3/ALDH3A1/PPARGC1B/DUOX2/STC1/SPARC/JUND/SDC1/ZFP36L1/DUSP1/JUNB/PENK/NOX4/FOSB	16
BP	GO:0001676	long-chain fatty acid metabolic process	17/854	109/18670	8.93298e-06	0.000371398	0.000285931	CYP1A1/CYP2B6/PTGS2/GSTA1/CBR1/AKR1C3/GLYATL2/CYP4F12/ALOX15B/FADS2/CYP4F3/HPGD/ELOVL6/CYP2C8/CYP2C9/CYP2A6/SLC27A2	17
BP	GO:0016051	carbohydrate biosynthetic process	25/854	208/18670	1.01541e-05	0.000418818	0.000322439	RBP4/PGD/G6PD/SORD/EXTL1/TKT/EGF/GPI/B3GNT9/GOT1/CHST12/SMPD3/PCK2/ALDOB/CHST8/NDST4/LEPR/PPARGC1A/ATF3/SLC37A4/ST6GALNAC5/B3GNT3/B3GALT2/IGF1/B3GALT5	25
BP	GO:0016999	antibiotic metabolic process	18/854	122/18670	1.08662e-05	0.000444658	0.000342332	AKR1C2/AKR1C1/ADH1A/CYP1A1/AKR1B10/ABCC2/UGT1A1/ALDH1A1/DPEP1/AKR1C3/SULT1C4/ADH1C/DUOXA2/AKR1C4/DUOX2/ACO2/PXDN/PCK2	18
BP	GO:0051216	cartilage development	25/854	209/18670	1.10444e-05	0.000446746	0.000343939	CCN1/TIMP1/CCN2/MEF2D/BMP3/COL1A1/COMP/ECM1/ESRRA/GREM1/COL14A1/LUM/STC1/GLI2/CD44/FRZB/MGP/SMPD3/SFRP2/ROR2/HYAL1/EFEMP1/ZEB1/TRPV4/SULF2	25
BP	GO:0052547	regulation of peptidase activity	42/854	452/18670	1.10891e-05	0.000446746	0.000343939	CCN1/CCK/TIMP1/CCN2/ITIH1/NGFR/PTGS2/SERPINE1/CAV1/AMBP/SERPINE2/DPEP1/SPINK1/THBS1/F2R/PERP/ECM1/VEGFA/AGT/FN1/CRYAB/VTN/CD44/CTSH/CD109/SFRP2/TIMP2/LTF/XDH/PAPLN/SERPINF1/SLPI/SERPINA6/ROBO1/HGF/RCN3/CST1/NLRP1/ANTXR1/BIN1/HIP1/SPOCK1	42
BP	GO:0009612	response to mechanical stimulus	25/854	210/18670	1.2005e-05	0.000479924	0.000369483	HTR2A/COL3A1/PTGS2/COL1A1/SERPINE2/THBS1/GOT1/AGT/PKD1L1/HPN/ENDOG/CNN2/ADGRV1/CXCL10/TTN/CXCR4/JUND/GCLC/ANO3/JUNB/IGFBP2/MAP1B/PIEZO2/TRPV4/FOSB	25
BP	GO:0010959	regulation of metal ion transport	38/854	394/18670	1.25313e-05	0.00049714	0.000382737	HTR2A/G6PD/PTGS2/CAV1/CHP1/SERPINE2/EGF/CCL2/SPINK1/LPAR3/APLNR/F2R/THY1/RGS4/CACNA1C/AGT/STC2/HOMER1/STC1/F2/ICAM1/PLCG2/CXCL10/DPP10/CXCR4/ADRA2A/LILRB2/CACNB1/SLC9A3R1/TRPV3/ANK2/PDGFRB/RRAD/EHD3/SLC30A10/HECW1/KCNIP3/BIN1	38
BP	GO:0051146	striated muscle cell differentiation	31/854	293/18670	1.29994e-05	0.000511802	0.000394025	G6PD/MYLK3/COMP/RGS4/CDH2/SHH/VEGFA/AGT/KLHL41/HOMER1/LMNA/GREM1/TMEM119/SCGB3A1/ALPK2/BDNF/CXCL10/TTN/CXADR/SDC1/PDGFRB/EFNB2/LDB3/CFL2/MYORG/EHD2/CSRP1/MYH10/DMPK/NOX4/IGF1	31
BP	GO:1903035	negative regulation of response to wounding	15/854	90/18670	1.31465e-05	0.000513702	0.000395487	FAP/FGG/FGA/SERPINE1/SERPINE2/THBS1/PLG/CPB2/SPP1/APOH/VTN/F2/CD109/C1QTNF1/TSPAN8	15
BP	GO:0048661	positive regulation of smooth muscle cell proliferation	16/854	101/18670	1.3308e-05	0.000516133	0.000397359	HTR1B/PTGS2/MEF2D/THBS1/AGT/MMP2/EREG/NR4A3/SMPD3/CDH13/HPGD/PPARGC1A/PDGFRB/TGM2/IGF1/NOTCH3	16
BP	GO:0030282	bone mineralization	17/854	114/18670	1.64282e-05	0.000632424	0.000486889	CCN1/NELL1/PTGS2/COMP/COL1A2/ECM1/PHEX/GREM1/TMEM119/ADGRV1/MGP/SMPD3/LTF/TGFB3/ROR2/ASGR2/IGF1	17
BP	GO:0071559	response to transforming growth factor beta	28/854	255/18670	1.70608e-05	0.000638413	0.0004915	PEG10/COL3A1/CAV1/COL1A1/THBS1/COL1A2/GOT1/CD109/MXRA5/TGFB3/LTBP1/LTBP2/F11R/HPGD/ZFP36L1/PPARGC1A/TGFB2/CDKN2B/SMAD7/RASL11B/LRG1/PENK/ZEB1/DKK3/HTRA3/NOX4/HSPA1A/COL4A2	28
BP	GO:0034113	heterotypic cell-cell adhesion	12/854	61/18670	1.70751e-05	0.000638413	0.0004915	FGG/FGA/PERP/THY1/APOA1/CD44/CD1D/IL1RN/NRCAM/LILRB2/ITGA5/CXADR	12
BP	GO:0071384	cellular response to corticosteroid stimulus	12/854	61/18670	1.70751e-05	0.000638413	0.0004915	ABCC2/UGT1A1/ASS1/AKR1C3/STC1/ICAM1/PCK2/SSTR5/GJB2/ANXA1/SERPINF1/ZFP36L1	12
BP	GO:0090303	positive regulation of wound healing	12/854	61/18670	1.70751e-05	0.000638413	0.0004915	SERPINE1/THBS1/F2R/PLG/CPB2/DUOX2/APOH/VTN/F2/CXCR4/ADRA2A/ANXA1	12
BP	GO:0007599	hemostasis	34/854	341/18670	1.78692e-05	0.000663329	0.000510682	FAP/FGG/COL3A1/FGA/SERPINE1/CAV1/COL1A1/SERPINE2/GPI/COMP/THBS1/F2R/COL1A2/PLG/SHH/F13B/CPB2/DGKI/APOH/VTN/F2/PLCG2/SLC7A11/ADRA2A/CYP4F11/C1QTNF1/FOXA2/F2RL1/F5/EHD3/EHD2/CSRP1/TSPAN8/ENTPD1	34
BP	GO:0006692	prostanoid metabolic process	10/854	43/18670	1.84256e-05	0.000674351	0.000519168	AKR1C2/PTGR1/PTGS2/ATP6V1B1/GSTA1/CBR1/AKR1C3/AKR1C4/HPGD/ANXA1	10
BP	GO:0006693	prostaglandin metabolic process	10/854	43/18670	1.84256e-05	0.000674351	0.000519168	AKR1C2/PTGR1/PTGS2/ATP6V1B1/GSTA1/CBR1/AKR1C3/AKR1C4/HPGD/ANXA1	10
BP	GO:0015721	bile acid and bile salt transport	8/854	27/18670	1.89413e-05	0.000688377	0.000529966	SLC51A/AKR1C1/SLCO1B1/ABCC2/AKR1C4/STARD5/SLC10A2/ABCC3	8
BP	GO:0007586	digestion	19/854	139/18670	1.90988e-05	0.000689283	0.000530663	AKR1C2/RBP4/CCK/AKR1C1/PIR/MGAM/GUCA2B/APOA1/GUCA2A/GCNT3/SCARB1/ADRA2A/PRSS3/MUC13/F11R/PPARGC1A/NPC1L1/FGF10/SLC5A1	19
BP	GO:0009743	response to carbohydrate	26/854	230/18670	2.03563e-05	0.000729596	0.0005617	GHRHR/GCLM/CCN2/ME1/PTGS2/APOB/THBS1/GOT1/NR0B2/CPB2/GJB6/LGALS1/ENDOG/SPARC/ICAM1/PCK2/ADRA2A/GCLC/SERPINF1/FOXA2/ZFP36L1/PPARGC1A/EGR1/MAP1B/LRP1/NOX4	26
BP	GO:0060828	regulation of canonical Wnt signaling pathway	30/854	286/18670	2.10617e-05	0.000747743	0.00057567	LGR5/WWTR1/CAV1/COL1A1/EGF/CDH2/SHH/PSMA6/PTK7/GREM1/CDH3/SFRP4/PLEKHA4/CTHRC1/FRZB/PRICKLE1/NKD2/SFRP2/SOX17/CTNND2/ADGRA2/SLC9A3R1/ROR2/EGR1/IGFBP2/HECW1/DKK3/SULF2/FGF10/TBX18	30
BP	GO:0044242	cellular lipid catabolic process	25/854	217/18670	2.11503e-05	0.000747743	0.00057567	ABHD3/IDH1/PHYH/AKR1B10/PLIN5/APOB/AKR1C3/ALDH3A2/GLYATL2/ABCD3/ABHD2/CYP4F12/MGST2/BCO1/APOA1/AADAC/PLCG2/SMPD3/CYP4F3/PCK2/SCARB1/LIPG/BCO2/SLC27A2/LRP1	25
BP	GO:0032964	collagen biosynthetic process	11/854	53/18670	2.24763e-05	0.000789253	0.000607628	CCN2/COL1A1/P3H3/F2R/GOT1/F2/COL5A1/TGFB3/PDGFRB/RCN3/VIM	11
BP	GO:1903039	positive regulation of leukocyte cell-cell adhesion	25/854	218/18670	2.28771e-05	0.000797935	0.000614312	ZP3/CAV1/CCL2/THY1/CD83/SHH/EGR3/RUNX1/LGALS1/GLI2/CD44/ICAM1/HHLA2/NR4A3/CD1D/LILRB2/ANXA1/EFNB2/VNN1/PAK3/IGFBP2/EFNB1/CCL19/HLA-DMB/IGF1	25
BP	GO:0014706	striated muscle tissue development	37/854	390/18670	2.3331e-05	0.000808342	0.000622324	RBP4/G6PD/MEF2D/CAV1/MYLK3/RGS4/SHH/VEGFA/EYA1/AGT/KLHL41/MSC/HOMER1/LMNA/EGR2/GREM1/ALPK2/TTN/SOX17/PPP1R13L/CXADR/DLL4/HEYL/ALDH1A2/PDGFRB/EFNB2/TGFB2/LRP2/ATF3/EGR1/CFL2/SMAD7/MYORG/MYH10/TCF21/NOX4/IGF1	37
BP	GO:1903524	positive regulation of blood circulation	13/854	73/18670	2.36812e-05	0.000815042	0.000627483	HTR2A/FGG/CCN2/PTGS2/FGA/CAV1/F2R/RGS4/ICAM1/SLC1A1/TGFB2/F2RL1/ACE2	13
BP	GO:0050900	leukocyte migration	44/854	499/18670	2.52388e-05	0.000862936	0.000664355	ZP3/CCL15/SERPINE1/CAV1/SELE/COL1A1/CCL2/APOB/THBS1/COL1A2/ECM1/H2BC1/THY1/VEGFA/SPNS2/GREM1/FN1/F2/CD44/ICAM1/CXCL10/SMPD3/SLC7A11/SCG2/CXCR4/IL1RN/F11R/ANXA1/ITGA5/CXADR/SDC1/DUSP1/MSN/ROR2/NBL1/TGFB2/F2RL1/CCL19/THBS4/CXCL1/TNFSF18/SWAP70/TRPV4/JAM2	44
BP	GO:0048762	mesenchymal cell differentiation	25/854	220/18670	2.67182e-05	0.000907545	0.000698698	WWTR1/COL1A1/EPHA3/FGF19/SHH/GREM1/FN1/HPN/PHLDB1/FRZB/SEMA5B/SFRP2/FAM83D/TGFB3/FOXA2/HEYL/ALDH1A2/TGFB2/JAG1/HGF/SMAD7/EFNB1/SEMA6C/TCF21/FGF10	25
BP	GO:1903036	positive regulation of response to wounding	13/854	74/18670	2.7541e-05	0.00092942	0.00071554	SERPINE1/THBS1/F2R/PLG/CPB2/DUOX2/APOH/VTN/F2/CXCR4/ADRA2A/ANXA1/LRP1	13
BP	GO:0010466	negative regulation of peptidase activity	28/854	262/18670	2.80401e-05	0.000940007	0.00072369	TIMP1/ITIH1/NGFR/PTGS2/SERPINE1/AMBP/SERPINE2/DPEP1/SPINK1/THBS1/ECM1/VEGFA/AGT/CRYAB/VTN/CD44/CD109/SFRP2/TIMP2/LTF/PAPLN/SERPINF1/SLPI/SERPINA6/HGF/CST1/BIN1/SPOCK1	28
BP	GO:0035987	endodermal cell differentiation	10/854	45/18670	2.82165e-05	0.000940007	0.00072369	INHBA/MMP2/FN1/VTN/COL5A1/SOX17/COL5A2/ITGA5/COL8A1/COL4A2	10
BP	GO:0030336	negative regulation of cell migration	33/854	334/18670	2.84214e-05	0.000940804	0.000724304	TIMP1/COL3A1/SERPINE1/DPEP1/TMIGD3/CCL2/THBS1/THY1/ABHD2/SHH/GREM1/ALOX15B/APOH/STC1/PTPRT/SFRP2/DPYSL3/MARVELD3/ADGRG1/EPHA1/SERPINF1/SLC9A3R1/DLL4/DUSP1/PPARGC1A/PTPRR/NBL1/ROBO1/JAG1/NAV3/SMAD7/MCTP1/LRP1	33
BP	GO:0048871	multicellular organismal homeostasis	43/854	486/18670	2.87096e-05	0.000944328	0.000727016	RBP4/HTR2A/FFAR4/ALB/CCN2/IRF4/DIO2/PTGS2/ATP6V1B1/WWTR1/CAV1/ALDH1A1/F2R/VEGFA/CYP4F12/HOMER1/PPARGC1B/CDH3/SPP1/TMEM119/ADGRV1/NR4A3/CTSH/RDH12/CXCR4/TNFRSF11B/MUC13/LTF/MFAP2/LEPR/ELOVL6/PPP1R13L/CXADR/PPARGC1A/CA2/LAMA4/RCN3/EGR1/FA2H/PDK4/NOX4/TRPV4/MYO5B	43
BP	GO:0071560	cellular response to transforming growth factor beta stimulus	27/854	249/18670	2.99985e-05	0.000980517	0.000754878	PEG10/COL3A1/CAV1/COL1A1/THBS1/COL1A2/GOT1/CD109/TGFB3/LTBP1/LTBP2/F11R/HPGD/ZFP36L1/PPARGC1A/TGFB2/CDKN2B/SMAD7/RASL11B/LRG1/PENK/ZEB1/DKK3/HTRA3/NOX4/HSPA1A/COL4A2	27
BP	GO:0007517	muscle organ development	38/854	410/18670	3.04632e-05	0.000989483	0.000761781	RBP4/G6PD/CNTFR/COL3A1/MEF2D/CAV1/ASS1/RGS4/BASP1/SHH/KLHL41/MSC/HOMER1/EGR3/EGR2/GREM1/CRYAB/CTF1/CXCL10/SGCA/TTN/TEAD4/SOX17/MKX/ITGA11/DLL4/HEYL/EFNB2/TGFB2/LRP2/ATF3/FHL3/EGR1/CFL2/SMAD7/MYORG/TCF21/IGF1	38
BP	GO:0044706	multi-multicellular organism process	25/854	222/18670	3.11323e-05	0.00100494	0.000773677	TIMP1/SLC38A3/CYP1A1/PTGS2/AMBP/SERPINE2/ABCC2/AGT/NRK/STC2/MMP2/SPP1/STC1/COL16A1/TFCP2L1/IGFBP7/GJB2/TGFB3/PSG5/HPGD/ITGA5/HSD11B2/JUNB/IGFBP2/FOSB	25
BP	GO:0007596	blood coagulation	33/854	336/18670	3.20435e-05	0.00102673	0.000790456	FAP/FGG/COL3A1/FGA/SERPINE1/CAV1/COL1A1/SERPINE2/COMP/THBS1/F2R/COL1A2/PLG/SHH/F13B/CPB2/DGKI/APOH/VTN/F2/PLCG2/SLC7A11/ADRA2A/CYP4F11/C1QTNF1/FOXA2/F2RL1/F5/EHD3/EHD2/CSRP1/TSPAN8/ENTPD1	33
BP	GO:0010951	negative regulation of endopeptidase activity	27/854	250/18670	3.22026e-05	0.00102673	0.000790456	TIMP1/ITIH1/NGFR/PTGS2/SERPINE1/AMBP/SERPINE2/DPEP1/SPINK1/THBS1/VEGFA/AGT/CRYAB/VTN/CD44/CD109/SFRP2/TIMP2/LTF/PAPLN/SERPINF1/SLPI/SERPINA6/HGF/CST1/BIN1/SPOCK1	27
BP	GO:0040013	negative regulation of locomotion	36/854	381/18670	3.2655e-05	0.00103481	0.000796674	TIMP1/COL3A1/SERPINE1/DPEP1/TMIGD3/CCL2/THBS1/THY1/ABHD2/SHH/GREM1/ALOX15B/APOH/STC1/SEMA5B/PTPRT/SFRP2/DPYSL3/MARVELD3/ADGRG1/EPHA1/SERPINF1/SLC9A3R1/DLL4/DUSP1/PPARGC1A/PTPRR/ROBO2/NBL1/ROBO1/JAG1/NAV3/SMAD7/MCTP1/LRP1/SEMA6C	36
BP	GO:0007431	salivary gland development	9/854	37/18670	3.28854e-05	0.00103579	0.000797431	SHH/FGF7/TFCP2L1/TGFB3/ESRP2/TGFB2/HGF/TGM2/FGF10	9
BP	GO:0007159	leukocyte cell-cell adhesion	33/854	337/18670	3.40078e-05	0.00106469	0.00081968	LGALS9C/ZP3/CAV1/SELE/ASS1/CCL2/THY1/CD83/SHH/LGALS9B/EGR3/CERCAM/RUNX1/LGALS1/GLI2/CD44/ICAM1/HHLA2/NR4A3/CD1D/LILRB2/ANXA1/ITGA5/MSN/EFNB2/VNN1/PAK3/SMAD7/IGFBP2/EFNB1/CCL19/HLA-DMB/IGF1	33
BP	GO:0007157	heterophilic cell-cell adhesion via plasma membrane cell adhesion molecules	10/854	46/18670	3.459e-05	0.00107643	0.000828721	SELE/CDH2/ICAM1/SCARF2/HMCN1/ITGA5/CXADR/FAT4/DCHS1/TENM2	10
BP	GO:0042310	vasoconstriction	13/854	76/18670	3.6939e-05	0.00114269	0.000879732	HTR2A/FGG/HTR1B/PTGS2/FGA/CAV1/COMP/F2R/AGT/ICAM1/ADRA2A/ACE2/ACTA2	13
BP	GO:0051271	negative regulation of cellular component movement	36/854	384/18670	3.85237e-05	0.00118466	0.000912044	TIMP1/COL3A1/SERPINE1/DPEP1/TMIGD3/CCL2/THBS1/THY1/ABHD2/SHH/GREM1/ALOX15B/APOH/STC1/SEMA5B/PTPRT/SFRP2/DPYSL3/MARVELD3/ADGRG1/EPHA1/SERPINF1/SLC9A3R1/DLL4/DUSP1/PPARGC1A/PTPRR/NBL1/ROBO1/JAG1/NAV3/SMAD7/MCTP1/LRP1/SEMA6C/BIN1	36
BP	GO:0001649	osteoblast differentiation	25/854	225/18670	3.89927e-05	0.00119203	0.000917717	CCN1/NELL1/VCAN/MEF2D/WWTR1/BMP3/COL1A1/ESRRA/SHH/TPM4/GREM1/SPP1/TMEM119/GLI2/CTHRC1/SFRP2/JUND/LTF/ITGA11/JAG1/HGF/PDLIM7/JUNB/PENK/IGF1	25
BP	GO:0046683	response to organophosphorus	18/854	134/18670	3.97943e-05	0.00120942	0.000931107	AKR1C1/PTGS2/COL1A1/ASS1/SLC26A3/ALDH3A1/PPARGC1B/DUOX2/STC1/SPARC/JUND/SDC1/ZFP36L1/DUSP1/JUNB/PENK/NOX4/FOSB	18
BP	GO:0001667	ameboidal-type cell migration	41/854	462/18670	4.09156e-05	0.00122815	0.000945523	FAP/TIMP1/PTGS2/GPI/THBS1/FGF19/SHH/VEGFA/AGT/EGR3/NR4A1/GREM1/FN1/FGF7/APOH/STC1/APOA1/SPARC/CTSH/SEMA5B/CDH13/SCG2/SOX17/SCARB1/MARVELD3/PRSS3/ADGRA2/JCAD/ANXA1/EPB41L4B/SERPINF1/DLL4/EFNB2/PTPRR/ROBO1/HYAL1/TGFB2/PAK3/EFNB1/SEMA6C/FGF10	41
BP	GO:0016102	diterpenoid biosynthetic process	5/854	10/18670	4.11512e-05	0.00122815	0.000945523	CYP1A1/AKR1C3/BCO1/CRABP2/ALDH1A2	5
BP	GO:0030647	aminoglycoside antibiotic metabolic process	5/854	10/18670	4.11512e-05	0.00122815	0.000945523	AKR1C2/AKR1C1/AKR1B10/AKR1C3/AKR1C4	5
BP	GO:0015804	neutral amino acid transport	9/854	38/18670	4.13558e-05	0.00122815	0.000945523	SLC38A3/SLC38A5/RGS4/SLC6A19/SLC43A1/SLC1A1/SLC6A9/SLC3A1/SLC36A2	9
BP	GO:0001558	regulation of cell growth	38/854	416/18670	4.18052e-05	0.00123444	0.000950368	G6PD/OSGIN1/SERPINE2/INHBA/PAPPA2/LPAR3/RGS4/VEGFA/AGT/SGK2/FN1/CRYAB/HPN/SPP1/F2/KRT17/SCGB3A1/FRZB/BDNF/SEMA5B/CRABP2/SFRP2/SOX17/CXCR4/RIMS1/IGFBP7/RASGRP2/NRCAM/HYAL1/TGFB2/MAP1B/CDHR2/LRP1/SEMA6C/HSPA1B/HSPA1A/SPOCK1/IGF1	38
BP	GO:0055001	muscle cell development	22/854	186/18670	4.34942e-05	0.00127706	0.000983178	G6PD/MYLK3/COMP/RGS4/VEGFA/AGT/KLHL41/HOMER1/LMNA/ALPK2/TTN/CXADR/SDC1/ANK2/PDGFRB/LDB3/CFL2/MYORG/CSRP1/MYH10/BIN1/IGF1	22
BP	GO:0043491	protein kinase B signaling	28/854	269/18670	4.50752e-05	0.00131604	0.00101319	AKR1C2/FAM110C/EGF/FGF5/CCL2/THBS1/FGF19/AKR1C3/EREG/FGF7/TXN/SMPD3/XDH/SLC9A3R1/C1QTNF1/CAVIN3/ZFP36L1/PDGFRB/TGFA/HGF/MEIS3/RCN3/MYORG/CCL19/NOX4/HIP1/FGF10/IGF1	28
BP	GO:0050817	coagulation	33/854	342/18670	4.55727e-05	0.00132314	0.00101865	FAP/FGG/COL3A1/FGA/SERPINE1/CAV1/COL1A1/SERPINE2/COMP/THBS1/F2R/COL1A2/PLG/SHH/F13B/CPB2/DGKI/APOH/VTN/F2/PLCG2/SLC7A11/ADRA2A/CYP4F11/C1QTNF1/FOXA2/F2RL1/F5/EHD3/EHD2/CSRP1/TSPAN8/ENTPD1	33
BP	GO:1903532	positive regulation of secretion by cell	37/854	403/18670	4.72024e-05	0.00136284	0.00104922	RBP4/CCK/LGALS9C/FGG/GHRHR/ZP3/ANG/FGA/GPI/INHBA/F2R/AGT/TSLP/LGALS9B/NR0B2/CPB2/ALOX15B/SPP1/TFR2/SMPD3/TTN/VAMP8/TGFB3/C1QTNF1/SDC1/RAB27B/TGFB2/F2RL1/NLRP1/CCL19/MYH10/LRP1/NCS1/ILDR1/TRPV4/IGF1/GRP	37
BP	GO:0007548	sex differentiation	28/854	270/18670	4.81543e-05	0.00138264	0.00106446	RBP4/CYP17A1/ZP3/ANG/CNTFR/MGST1/IDH1/DMRTA1/INHBA/AKR1C3/BASP1/SHH/VEGFA/EREG/LHFPL2/ICAM1/SFRP2/ADGRG1/SDC1/FSTL3/PDGFRB/ROR2/ROBO2/TGFB2/LRP2/SYCP2/TCF21/FGF10	28
BP	GO:0016114	terpenoid biosynthetic process	6/854	16/18670	4.85558e-05	0.00138651	0.00106744	CYP1A1/AKR1C3/BCO1/CRABP2/HMGCS2/ALDH1A2	6
BP	GO:0071248	cellular response to metal ion	22/854	188/18670	5.12132e-05	0.00144959	0.00111601	CYP1A1/PTGS2/DPEP1/AKR1C3/NQO1/SHH/TFR2/ENDOG/ADGRV1/SYT8/SMPD3/JUND/RASGRP2/SLC25A24/SERPINF1/FSTL3/PPARGC1A/CPNE2/JUNB/SLC30A10/FOSB/SYT13	22
BP	GO:0010810	regulation of cell-substrate adhesion	24/854	215/18670	5.13228e-05	0.00144959	0.00111601	CCN1/FGG/FGA/SERPINE1/COL1A1/EPHA3/THBS1/PLG/THY1/VEGFA/FN1/LGALS1/APOA1/VTN/CDH13/COL16A1/EPHA1/CCDC80/EDIL3/ITGA5/COL8A1/JAG1/LRP1/SPOCK1	24
BP	GO:0070372	regulation of ERK1 and ERK2 cascade	30/854	300/18670	5.18588e-05	0.00145681	0.00112157	CCN1/HTR2A/FGG/FFAR4/CCN2/PSCA/ALKAL2/CCL15/FGA/CCL2/FGF19/F2R/FN1/CD44/ICAM1/PLA2G2A/FAM83D/SLC9A3R1/CAVIN3/DUSP1/PDGFRB/PTPRR/F2RL1/ATF3/SLC30A10/CCL19/LRP1/NOX4/TRPV4/FGF10	30
BP	GO:0071230	cellular response to amino acid stimulus	12/854	68/18670	5.32012e-05	0.00148649	0.00114441	GCLM/COL3A1/COL1A1/ASS1/COL1A2/CASTOR1/MMP2/COL16A1/COL5A2/GCLC/COL4A1/ZEB1	12
BP	GO:0098754	detoxification	18/854	137/18670	5.35814e-05	0.0014891	0.00114643	ALB/MGST1/PTGS2/AKR1B10/GSTA1/ABCC2/NQO1/SOD3/MGST2/DUOX2/TXN/GPX2/PXDN/RDH12/SRXN1/AKR7A3/PON3/PDZK1	18
BP	GO:0071385	cellular response to glucocorticoid stimulus	11/854	58/18670	5.44948e-05	0.00150643	0.00115977	ABCC2/UGT1A1/ASS1/STC1/ICAM1/PCK2/SSTR5/GJB2/ANXA1/SERPINF1/ZFP36L1	11
BP	GO:0043200	response to amino acid	16/854	113/18670	5.53067e-05	0.00152079	0.00117082	GCLM/CCN2/COL3A1/COL1A1/ASS1/COL1A2/CASTOR1/MMP2/ICAM1/COL16A1/COL5A2/GCLC/PPARGC1A/GLRB/COL4A1/ZEB1	16
BP	GO:0045778	positive regulation of ossification	14/854	90/18670	5.60326e-05	0.00153264	0.00117994	CCN1/NELL1/TMEM119/CTHRC1/ADGRV1/SFRP2/JUND/LTF/TGFB3/TGFB2/JAG1/HGF/PDLIM7/IGF1	14
BP	GO:0016485	protein processing	24/854	217/18670	5.95414e-05	0.00161165	0.00124077	FGG/ERO1B/FGA/SERPINE1/SERPINE2/COMP/THBS1/PERP/H2BC1/SHH/CES1/CPB2/HPN/APOH/CTSH/NKD2/GGT1/PRSS3/CPZ/C1R/ADAMTS2/ACE2/AEBP1/KLK6	24
BP	GO:0050920	regulation of chemotaxis	24/854	217/18670	5.95414e-05	0.00161165	0.00124077	SERPINE1/CCL2/THBS1/VEGFA/GREM1/CXCL10/SEMA5B/CDH13/SCG2/CXCR4/ADGRA2/DUSP1/PDGFRB/EFNB2/ROBO2/NBL1/ROBO1/F2RL1/CCL19/THBS4/SEMA6C/SWAP70/TRPV4/FGF10	24
BP	GO:0001935	endothelial cell proliferation	22/854	191/18670	6.50953e-05	0.00175285	0.00134948	ANG/NGFR/CAV1/CCL2/APLNR/THBS1/ECM1/VEGFA/EGR3/NR4A1/APOH/APOA1/SPARC/CDH13/SCG2/SCARB1/XDH/JCAD/DLL4/ALDH1A2/LRG1/THBS4	22
BP	GO:0043270	positive regulation of ion transport	28/854	275/18670	6.6587e-05	0.00178378	0.00137329	CCK/SLC38A3/G6PD/CAV1/CHP1/RAB3B/CCL2/LPAR3/APLNR/F2R/THY1/AGT/HOMER1/STC1/APOA1/F2/PLCG2/CXCL10/VAMP8/ADRA2A/ABCB1/SLC9A3R1/TRPV3/ANK2/PDGFRB/EHD3/PDZK1/ACE2	28
BP	GO:0050680	negative regulation of epithelial cell proliferation	20/854	165/18670	6.75823e-05	0.00179706	0.00138351	NGFR/CAV1/CCL2/THBS1/CPB2/HPN/EREG/APOH/SPARC/CD109/SFRP2/SCG2/MARVELD3/XDH/SERPINF1/DLL4/EFNB2/ROBO1/TGFB2/CDKN2B	20
BP	GO:2000146	negative regulation of cell motility	33/854	349/18670	6.77744e-05	0.00179706	0.00138351	TIMP1/COL3A1/SERPINE1/DPEP1/TMIGD3/CCL2/THBS1/THY1/ABHD2/SHH/GREM1/ALOX15B/APOH/STC1/PTPRT/SFRP2/DPYSL3/MARVELD3/ADGRG1/EPHA1/SERPINF1/SLC9A3R1/DLL4/DUSP1/PPARGC1A/PTPRR/NBL1/ROBO1/JAG1/NAV3/SMAD7/MCTP1/LRP1	33
BP	GO:0007565	female pregnancy	22/854	192/18670	7.0418e-05	0.00185768	0.00143018	TIMP1/SLC38A3/PTGS2/AMBP/ABCC2/AGT/STC2/MMP2/SPP1/STC1/COL16A1/TFCP2L1/IGFBP7/GJB2/TGFB3/PSG5/HPGD/ITGA5/HSD11B2/JUNB/IGFBP2/FOSB	22
BP	GO:0090103	cochlea morphogenesis	7/854	24/18670	7.1378e-05	0.00187349	0.00144236	EYA1/PTK7/HPN/GLI2/CTHRC1/FRZB/ZEB1	7
BP	GO:0003184	pulmonary valve morphogenesis	6/854	17/18670	7.21425e-05	0.00187462	0.00144323	NFATC1/HEYL/ROBO2/ROBO1/TGFB2/JAG1	6
BP	GO:0006750	glutathione biosynthetic process	6/854	17/18670	7.21425e-05	0.00187462	0.00144323	GCLM/GGCT/MGST2/SLC7A11/GGT1/GCLC	6
BP	GO:0090288	negative regulation of cellular response to growth factor stimulus	20/854	166/18670	7.36091e-05	0.00188301	0.00144969	PEG10/CAV1/THBS1/AGT/GREM1/CD109/SFRP2/HHEX/TGFB3/XDH/LTBP1/ADGRA2/FSTL3/NBL1/LRP2/SMAD7/RASL11B/HTRA3/SULF2/HSPA1A	20
BP	GO:0001706	endoderm formation	10/854	50/18670	7.38566e-05	0.00188301	0.00144969	INHBA/MMP2/FN1/VTN/COL5A1/SOX17/COL5A2/ITGA5/COL8A1/COL4A2	10
BP	GO:0042398	cellular modified amino acid biosynthetic process	10/854	50/18670	7.38566e-05	0.00188301	0.00144969	GCLM/CKMT2/GGCT/BBOX1/MGST2/SLC7A11/GGT1/CKMT1B/GCLC/CKMT1A	10
BP	GO:0071383	cellular response to steroid hormone stimulus	26/854	248/18670	7.39145e-05	0.00188301	0.00144969	GHRHR/ABCC2/UGT1A1/ASS1/SCGB2A1/AKR1C3/ESRRA/ABHD2/NR0B2/PPARGC1B/NR4A1/RUNX1/STC1/ICAM1/NR4A3/PCK2/SSTR5/GJB2/LBH/ANXA1/SERPINF1/ZFP36L1/HEYL/PPARGC1A/FHL2/TCF21	26
BP	GO:0019369	arachidonic acid metabolic process	10/854	51/18670	8.81466e-05	0.00222378	0.00171204	CYP1A1/CYP2B6/PTGS2/CBR1/AKR1C3/CYP4F12/ALOX15B/CYP2C8/CYP2C9/CYP2A6	10
BP	GO:0048260	positive regulation of receptor-mediated endocytosis	10/854	51/18670	8.81466e-05	0.00222378	0.00171204	SERPINE1/SELE/EGF/VEGFA/GREM1/SFRP4/VTN/PLCG2/CCL19/HIP1	10
BP	GO:0097191	extrinsic apoptotic signaling pathway	24/854	224/18670	9.83968e-05	0.00247038	0.00190189	FGG/GCLM/ITPRIP/FGA/SERPINE1/CAV1/INHBA/THBS1/EYA1/AGT/LMNA/ICAM1/SFRP2/SCG2/GCLC/DEPTOR/TGFB2/ATF3/HGF/HSPA1B/HSPA1A/FGF10/PEA15/IGF1	24
BP	GO:0006790	sulfur compound metabolic process	34/854	372/18670	0.000103241	0.00257955	0.00198593	GCLM/GSTA2/G6PD/MGST1/IDH1/VCAN/GSTA1/ABCC2/DPEP1/GGCT/SULT2B1/BGN/SULT1C4/NAT8/MGST2/LUM/CHST12/BAAT/SLC7A11/ELOVL7/GGT1/CHST8/NDST4/HMGCS2/GCLC/ELOVL6/DBI/TST/HYAL1/PDK4/CHST4/B3GNT3/NOX4/AHCYL2	34
BP	GO:0048705	skeletal system morphogenesis	25/854	239/18670	0.000104669	0.00259735	0.00199964	CCN2/MEF2D/COL1A1/COMP/PAPPA2/EYA1/PPARGC1B/GREM1/MMP2/COL14A1/SFRP4/STC1/TMEM119/MGP/SMPD3/SFRP2/LTF/TGFB3/NAB1/ROR2/HYAL1/MDFI/HHIP/ZEB1/TRPV4	25
BP	GO:1903522	regulation of blood circulation	29/854	297/18670	0.000104954	0.00259735	0.00199964	HTR2A/FGG/CCN2/CACNA2D3/PTGS2/FGA/CAV1/TMIGD3/F2R/RGS4/CACNA1C/AGT/STC1/ICAM1/KCNK6/ADRA2A/SLC1A1/CACNB1/CXADR/KCNJ3/ANK2/TGFB2/F2RL1/SMAD7/EHD3/KCNIP3/DMPK/ACE2/BIN1	29
BP	GO:0097756	negative regulation of blood vessel diameter	13/854	84/18670	0.000108062	0.00266159	0.0020491	HTR2A/FGG/HTR1B/PTGS2/FGA/CAV1/COMP/F2R/AGT/ICAM1/ADRA2A/ACE2/ACTA2	13
BP	GO:0046890	regulation of lipid biosynthetic process	22/854	198/18670	0.000111309	0.00272865	0.00210072	CCN1/HTR2A/ZP3/IDH1/PTGS2/PLIN5/TM7SF2/APOB/FGF19/AKR1C3/CYP51A1/APOA1/SMPD3/SCARB1/IGFBP7/ELOVL6/ANXA1/PPARGC1A/EGR1/PDK4/DKK3/TREX1	22
BP	GO:0007409	axonogenesis	40/854	468/18670	0.000114674	0.00277919	0.00213964	CCK/LRTM1/TUBB3/NGFR/EPHA3/LPAR3/GAP43/THY1/CDH2/SHH/VEGFA/PARD6B/EGR2/EPHB3/FN1/CDH11/PALLD/SPP1/GLI2/NR4A3/BDNF/SEMA5B/CRABP2/CXCR4/RAP1GAP/NRCAM/EPHA1/EFNB2/ROBO2/ROBO1/BOC/PAK3/PDLIM7/COBL/EFNB1/MYH10/MAP1B/LRP1/SEMA6C/VSTM2L	40
BP	GO:0022604	regulation of cell morphogenesis	41/854	484/18670	0.000114848	0.00277919	0.00213964	FGG/NGFR/FGA/CCL2/LPAR3/THY1/CDH2/VEGFA/EPHB3/FN1/RHOU/HPN/SPP1/APOA1/F2/CD44/SPARC/ICAM1/S100A13/BDNF/SEMA5B/CRABP2/CXCR4/RIMS1/NRCAM/CDC42EP3/ANXA1/SLC9A3R1/RND3/SHROOM3/MSN/ROBO2/FBLIM1/ROBO1/PAK3/HECW1/MYH10/MAP1B/LRP1/SEMA6C/PALM	41
BP	GO:0022612	gland morphogenesis	16/854	120/18670	0.000114975	0.00277919	0.00213964	CAV1/SHH/CPB2/HPN/FGF7/GLI2/TGFB3/SLC9A3R1/ESRP2/MSN/TGFB2/HGF/CRIP1/TGM2/SULF2/FGF10	16
BP	GO:0006775	fat-soluble vitamin metabolic process	9/854	43/18670	0.000116521	0.00279109	0.0021488	CYP1A1/CBR1/RBP2/CYP4F12/BCO1/LRAT/CYP4F11/ALDH1A2/LRP2	9
BP	GO:0007435	salivary gland morphogenesis	8/854	34/18670	0.000116542	0.00279109	0.0021488	SHH/FGF7/TGFB3/ESRP2/TGFB2/HGF/TGM2/FGF10	8
BP	GO:0006534	cysteine metabolic process	5/854	12/18670	0.000119771	0.00285526	0.0021982	GCLM/SLC7A11/GGT1/GCLC/TST	5
BP	GO:1901342	regulation of vasculature development	37/854	422/18670	0.000122667	0.00291097	0.00224109	NGFR/PTGS2/SERPINE1/ANGPTL4/APLNR/THBS1/ECM1/VEGFA/AGT/RUNX1/APOH/SPARC/HTATIP2/CXCL10/CTSH/THBS2/SFRP2/CXCR4/HHEX/XDH/ADGRA2/NFATC1/EPHA1/JCAD/ANXA1/ITGA5/SERPINF1/DLL4/EFNB2/HYAL1/TGFB2/HGF/EGR1/ISM1/LRG1/THBS4/COL4A2	37
BP	GO:0007187	G protein-coupled receptor signaling pathway, coupled to cyclic nucleotide second messenger	26/854	256/18670	0.000124712	0.00293133	0.00225676	HTR2A/GHRHR/HTR1B/LGR5/GPR176/HTR4/CCL2/LPAR3/AGT/ADGRG7/GRM7/CXCL10/VIPR1/NPY/ADRA2A/SSTR5/ADGRG1/ANXA1/RGS1/SLC9A3R1/GPHA2/ADGRF1/APLP1/ADGRG5/GNAZ/PALM	26
BP	GO:0030194	positive regulation of blood coagulation	7/854	26/18670	0.000125217	0.00293133	0.00225676	SERPINE1/THBS1/F2R/PLG/CPB2/APOH/F2	7
BP	GO:1900048	positive regulation of hemostasis	7/854	26/18670	0.000125217	0.00293133	0.00225676	SERPINE1/THBS1/F2R/PLG/CPB2/APOH/F2	7
BP	GO:0090130	tissue migration	33/854	361/18670	0.000129427	0.00301628	0.00232217	FAP/PTGS2/GPI/THBS1/VEGFA/AGT/EGR3/NR4A1/GREM1/FGF7/APOH/STC1/APOA1/SPARC/CTSH/CDH13/SCG2/SCARB1/MARVELD3/PRSS3/ADGRA2/JCAD/ANXA1/EPB41L4B/SERPINF1/DLL4/EFNB2/PTPRR/ROBO1/HYAL1/TGFB2/FGF10/ACTA2	33
BP	GO:0055002	striated muscle cell development	20/854	173/18670	0.00013091	0.00303723	0.00233829	G6PD/MYLK3/COMP/RGS4/VEGFA/AGT/KLHL41/HOMER1/LMNA/ALPK2/TTN/CXADR/SDC1/PDGFRB/LDB3/CFL2/MYORG/CSRP1/MYH10/IGF1	20
BP	GO:0006766	vitamin metabolic process	17/854	134/18670	0.000132748	0.00305263	0.00235015	CYP1A1/CYB5A/CBR1/RBP2/AKR1C3/CYP4F12/BCO1/AOX1/SLC2A3/PRSS3/LRAT/GCLC/CYP4F11/TCN2/ALDH1A2/LRP2/VNN1	17
BP	GO:0048565	digestive tract development	17/854	134/18670	0.000132748	0.00305263	0.00235015	CYP1A1/COL3A1/ASS1/SHH/EPHB3/GLI2/NPY/SFRP2/SOX17/TGFB3/FAT4/ALDH1A2/TGFB2/DCHS1/COBL/TCF21/FGF10	17
BP	GO:0042446	hormone biosynthetic process	13/854	86/18670	0.000138165	0.00315954	0.00243246	CYP17A1/DIO2/AKR1C3/AKR1B15/STC2/DUOX2/SCARB1/CHST8/HSD11B2/PPARGC1A/EGR1/HSD11B1/DKK3	13
BP	GO:0045669	positive regulation of osteoblast differentiation	11/854	64/18670	0.000138614	0.00315954	0.00243246	CCN1/NELL1/TMEM119/CTHRC1/SFRP2/JUND/LTF/JAG1/HGF/PDLIM7/IGF1	11
BP	GO:0071241	cellular response to inorganic substance	23/854	215/18670	0.000139546	0.00316323	0.0024353	CYP1A1/PTGS2/DPEP1/AKR1C3/NQO1/SHH/TFR2/ENDOG/ADGRV1/SYT8/SMPD3/JUND/RASGRP2/SLC25A24/SERPINF1/FSTL3/PPARGC1A/CPNE2/JUNB/SLC30A10/FOSB/TREX1/SYT13	23
BP	GO:0044331	cell-cell adhesion mediated by cadherin	9/854	44/18670	0.000140602	0.00316323	0.0024353	CDH18/PLG/CDH2/VEGFA/CDH11/CDH3/CDH13/FOXA2/CDHR2	9
BP	GO:0050982	detection of mechanical stimulus	9/854	44/18670	0.000140602	0.00316323	0.0024353	HTR2A/SERPINE2/PKD1L1/HPN/ADGRV1/TTN/CXCR4/ANO3/PIEZO2	9
BP	GO:0052548	regulation of endopeptidase activity	37/854	425/18670	0.000141546	0.00317075	0.00244109	CCN1/CCK/TIMP1/CCN2/ITIH1/NGFR/PTGS2/SERPINE1/AMBP/SERPINE2/DPEP1/SPINK1/THBS1/F2R/PERP/VEGFA/AGT/CRYAB/VTN/CD44/CTSH/CD109/SFRP2/TIMP2/LTF/XDH/PAPLN/SERPINF1/SLPI/SERPINA6/ROBO1/HGF/CST1/NLRP1/BIN1/HIP1/SPOCK1	37
BP	GO:0045807	positive regulation of endocytosis	14/854	98/18670	0.000144236	0.00321715	0.00247681	SERPINE1/SELE/EGF/VEGFA/GREM1/SFRP4/TFR2/VTN/PLCG2/F2RL1/CCL19/RAB31/LRP1/HIP1	14
BP	GO:0035909	aorta morphogenesis	8/854	35/18670	0.000145068	0.00321934	0.0024785	COL3A1/EYA1/DLL4/PDGFRB/EFNB2/TGFB2/JAG1/LRP1	8
BP	GO:0019184	nonribosomal peptide biosynthetic process	6/854	19/18670	0.000146193	0.00321934	0.0024785	GCLM/GGCT/MGST2/SLC7A11/GGT1/GCLC	6
BP	GO:1902644	tertiary alcohol metabolic process	6/854	19/18670	0.000146193	0.00321934	0.0024785	AKR1C2/AKR1C1/AKR1B10/AKR1C3/AKR1C4/DKK3	6
BP	GO:0016042	lipid catabolic process	31/854	333/18670	0.000147837	0.00324181	0.00249579	ABHD3/IDH1/PHYH/AKR1B10/PLIN5/APOB/AKR1C3/ALDH3A2/GLYATL2/ABCD3/ABHD2/CYP4F12/CES1/MGST2/BCO1/SPP1/APOA1/AADAC/PLCXD2/PLCG2/SMPD3/CYP4F3/PLA2G2A/PCK2/SCARB1/LIPG/ADRA2A/BCO2/PLD1/SLC27A2/LRP1	31
BP	GO:0050870	positive regulation of T cell activation	22/854	202/18670	0.000149158	0.00325703	0.00250751	ZP3/CAV1/CCL2/THY1/CD83/SHH/EGR3/RUNX1/LGALS1/GLI2/HHLA2/CD1D/LILRB2/ANXA1/EFNB2/VNN1/PAK3/IGFBP2/EFNB1/CCL19/HLA-DMB/IGF1	22
BP	GO:0051928	positive regulation of calcium ion transport	16/854	123/18670	0.000154307	0.00335538	0.00258323	G6PD/CAV1/CCL2/LPAR3/APLNR/F2R/THY1/HOMER1/STC1/F2/PLCG2/CXCL10/TRPV3/ANK2/PDGFRB/EHD3	16
BP	GO:0051781	positive regulation of cell division	13/854	87/18670	0.00015575	0.00337263	0.00259651	FGF5/ZNF16/SHH/VEGFA/EREG/FGF7/CDC6/SSTR5/TGFB3/LBH/TGFB2/TGFA/THBS4	13
BP	GO:0007162	negative regulation of cell adhesion	28/854	289/18670	0.000156493	0.00337466	0.00259807	LGALS9C/FGG/SERPINE1/COL1A1/SERPINE2/ASS1/THBS1/B4GALNT2/PLG/SHH/VEGFA/LGALS9B/RUNX1/LGALS1/APOA1/CDH13/IL1RN/LILRB2/ANXA1/C1QTNF1/DUSP1/JAG1/SMAD7/LRP1/SWAP70/TRPV4/SPOCK1/JAM2	28
BP	GO:1903037	regulation of leukocyte cell-cell adhesion	29/854	304/18670	0.000157431	0.00338086	0.00260285	LGALS9C/ZP3/CAV1/ASS1/CCL2/THY1/CD83/SHH/LGALS9B/EGR3/RUNX1/LGALS1/GLI2/CD44/ICAM1/HHLA2/NR4A3/CD1D/LILRB2/ANXA1/EFNB2/VNN1/PAK3/SMAD7/IGFBP2/EFNB1/CCL19/HLA-DMB/IGF1	29
BP	GO:0014074	response to purine-containing compound	18/854	149/18670	0.000160367	0.00342975	0.00264048	PTGS2/COL1A1/ASS1/SLC26A3/ALDH3A1/PPARGC1B/DUOX2/STC1/SPARC/JUND/SDC1/ZFP36L1/DUSP1/PPARGC1A/JUNB/PENK/NOX4/FOSB	18
BP	GO:0062197	cellular response to chemical stress	32/854	350/18670	0.000162263	0.00344363	0.00265118	G6PD/MGST1/PTGS2/CAV1/DPEP1/AKR1C3/NQO1/SOD3/PPARGC1B/MMP2/ENDOG/TXN/NR4A3/SMPD3/SLC7A11/GPX2/SRXN1/GJB2/SLC25A24/ANXA1/ZFP36L1/PPARGC1A/VNN1/HGF/MSRB3/PENK/NOX4/HSPA1B/TRPV4/HSPA1A/TREX1/MGAT3	32
BP	GO:0050820	positive regulation of coagulation	7/854	27/18670	0.000162414	0.00344363	0.00265118	SERPINE1/THBS1/F2R/PLG/CPB2/APOH/F2	7
BP	GO:0051047	positive regulation of secretion	37/854	428/18670	0.000163004	0.00344363	0.00265118	RBP4/CCK/LGALS9C/FGG/GHRHR/ZP3/ANG/FGA/GPI/INHBA/F2R/AGT/TSLP/LGALS9B/NR0B2/CPB2/ALOX15B/SPP1/TFR2/SMPD3/TTN/VAMP8/TGFB3/C1QTNF1/SDC1/RAB27B/TGFB2/F2RL1/NLRP1/CCL19/MYH10/LRP1/NCS1/ILDR1/TRPV4/IGF1/GRP	37
BP	GO:0060070	canonical Wnt signaling pathway	31/854	335/18670	0.000164636	0.00345742	0.00266179	LGR5/WWTR1/CAV1/COL1A1/EGF/CDH2/SHH/PSMA6/PTK7/GREM1/CDH3/SFRP4/PLEKHA4/CTHRC1/FRZB/PRICKLE1/NKD2/SFRP2/SOX17/CTNND2/ADGRA2/SLC9A3R1/SDC1/ROR2/EGR1/IGFBP2/HECW1/DKK3/SULF2/FGF10/TBX18	31
BP	GO:0001936	regulation of endothelial cell proliferation	20/854	176/18670	0.000165653	0.00345742	0.00266179	ANG/NGFR/CAV1/CCL2/APLNR/THBS1/ECM1/VEGFA/EGR3/NR4A1/APOH/SPARC/CDH13/SCG2/XDH/JCAD/DLL4/ALDH1A2/LRG1/THBS4	20
BP	GO:0051897	positive regulation of protein kinase B signaling	20/854	176/18670	0.000165653	0.00345742	0.00266179	AKR1C2/FAM110C/EGF/FGF5/THBS1/FGF19/AKR1C3/EREG/FGF7/TXN/C1QTNF1/PDGFRB/TGFA/HGF/MEIS3/MYORG/CCL19/NOX4/HIP1/FGF10	20
BP	GO:0031214	biomineral tissue development	19/854	163/18670	0.000171427	0.00354943	0.00273262	CCN1/NELL1/PTGS2/COL1A1/COMP/COL1A2/ECM1/PHEX/GREM1/SPP1/TMEM119/ADGRV1/MGP/SMPD3/LTF/TGFB3/ROR2/ASGR2/IGF1	19
BP	GO:0110148	biomineralization	19/854	163/18670	0.000171427	0.00354943	0.00273262	CCN1/NELL1/PTGS2/COL1A1/COMP/COL1A2/ECM1/PHEX/GREM1/SPP1/TMEM119/ADGRV1/MGP/SMPD3/LTF/TGFB3/ROR2/ASGR2/IGF1	19
BP	GO:0007411	axon guidance	27/854	276/18670	0.00017389	0.00358614	0.00276089	LRTM1/TUBB3/EPHA3/GAP43/SHH/VEGFA/EGR2/EPHB3/PALLD/GLI2/NR4A3/BDNF/SEMA5B/CXCR4/RAP1GAP/NRCAM/EPHA1/EFNB2/ROBO2/ROBO1/BOC/PDLIM7/EFNB1/MYH10/LRP1/SEMA6C/VSTM2L	27
BP	GO:0010631	epithelial cell migration	32/854	352/18670	0.000180042	0.00369833	0.00284726	FAP/PTGS2/GPI/THBS1/VEGFA/AGT/EGR3/NR4A1/GREM1/FGF7/APOH/STC1/APOA1/SPARC/CTSH/CDH13/SCG2/SCARB1/MARVELD3/PRSS3/ADGRA2/JCAD/ANXA1/EPB41L4B/SERPINF1/DLL4/EFNB2/PTPRR/ROBO1/HYAL1/TGFB2/FGF10	32
BP	GO:0097485	neuron projection guidance	27/854	277/18670	0.000184507	0.00376241	0.00289659	LRTM1/TUBB3/EPHA3/GAP43/SHH/VEGFA/EGR2/EPHB3/PALLD/GLI2/NR4A3/BDNF/SEMA5B/CXCR4/RAP1GAP/NRCAM/EPHA1/EFNB2/ROBO2/ROBO1/BOC/PDLIM7/EFNB1/MYH10/LRP1/SEMA6C/VSTM2L	27
BP	GO:0015893	drug transport	22/854	205/18670	0.000184609	0.00376241	0.00289659	HTR2A/SLC38A3/HTR1B/SLC38A5/ABCC2/INHBA/RAB3B/RGS4/AGT/SLC13A1/SLC47A1/SYT8/SLC7A11/SLC25A25/SLC25A24/SLC1A1/TCN2/CA2/SLC6A9/LRP2/SLC36A2/SYT13	22
BP	GO:0060712	spongiotrophoblast layer development	5/854	13/18670	0.000187307	0.00380248	0.00292744	PHLDA2/SOCS3/NRK/GJB5/ZFP36L1	5
BP	GO:0061008	hepaticobiliary system development	17/854	138/18670	0.00019058	0.00385388	0.00296701	CYP1A1/UGT1A1/ASS1/CPB2/HPN/ACO2/VTN/FRZB/BAAT/PCK2/SOX17/ANXA1/AK4/ALDH1A2/HGF/COBL/SULF2	17
BP	GO:0090090	negative regulation of canonical Wnt signaling pathway	20/854	178/18670	0.000193101	0.00388971	0.0029946	WWTR1/CAV1/CDH2/SHH/PSMA6/GREM1/SFRP4/CTHRC1/FRZB/PRICKLE1/NKD2/SFRP2/SOX17/SLC9A3R1/ROR2/EGR1/IGFBP2/HECW1/DKK3/TBX18	20
BP	GO:0050679	positive regulation of epithelial cell proliferation	22/854	206/18670	0.000197978	0.00397255	0.00305838	ANG/APLNR/ECM1/SHH/VEGFA/EYA1/EGR3/NR4A1/HPN/CDH3/FGF7/NR4A3/CDH13/SCG2/JCAD/ESRP2/HYAL1/TGFA/LRG1/THBS4/FGF10/IGF1	22
BP	GO:0031589	cell-substrate adhesion	32/854	354/18670	0.000199545	0.00398859	0.00307072	CCN1/FGG/CCN2/COL3A1/FGA/SERPINE1/COL1A1/EPHA3/THBS1/PLG/THY1/VEGFA/EPHB3/FN1/LGALS1/APOA1/VTN/CD44/CDH13/COL16A1/EPHA1/CCDC80/EDIL3/ITGA5/ITGA11/ITGBL1/COL8A1/JAG1/ANTXR1/LRP1/PPFIA2/SPOCK1	32
BP	GO:0019373	epoxygenase P450 pathway	6/854	20/18670	0.000200802	0.00399835	0.00307824	CYP1A1/CYP2B6/CYP4F12/CYP2C8/CYP2C9/CYP2A6	6
BP	GO:0008209	androgen metabolic process	7/854	28/18670	0.000208065	0.00409589	0.00315334	CYP17A1/SHH/AKR1C4/SPP1/UGT2B7/SCARB1/PPARGC1A	7
BP	GO:0034368	protein-lipid complex remodeling	7/854	28/18670	0.000208065	0.00409589	0.00315334	ALB/APOB/AGT/APOA1/PLA2G2A/SCARB1/LIPG	7
BP	GO:0034369	plasma lipoprotein particle remodeling	7/854	28/18670	0.000208065	0.00409589	0.00315334	ALB/APOB/AGT/APOA1/PLA2G2A/SCARB1/LIPG	7
BP	GO:0090132	epithelium migration	32/854	355/18670	0.000209987	0.00411812	0.00317045	FAP/PTGS2/GPI/THBS1/VEGFA/AGT/EGR3/NR4A1/GREM1/FGF7/APOH/STC1/APOA1/SPARC/CTSH/CDH13/SCG2/SCARB1/MARVELD3/PRSS3/ADGRA2/JCAD/ANXA1/EPB41L4B/SERPINF1/DLL4/EFNB2/PTPRR/ROBO1/HYAL1/TGFB2/FGF10	32
BP	GO:2000379	positive regulation of reactive oxygen species metabolic process	14/854	102/18670	0.000222028	0.00433789	0.00333964	PTGS2/ASS1/THBS1/AKR1C3/DUOXA2/AGT/F2/ICAM1/XDH/PDGFRB/F2RL1/AGXT2/ACE2/NOX4	14
BP	GO:0043434	response to peptide hormone	37/854	436/18670	0.000235248	0.0045626	0.00351264	TIMP1/GHRHR/CCN2/PTGS2/ATP6V1B1/CAV1/COL1A1/ABCC2/ASS1/GOT1/PHEX/ESRRA/SOCS3/AGT/STC2/NR4A1/EGR2/EREG/CDC6/SPARC/ICAM1/NR4A3/PCK2/JUND/HHEX/GJB2/GCLC/ANXA1/HSD11B2/ZFP36L1/CA2/EGR1/PDK4/SLC30A10/RAB31/MAP1B/TRPV4	37
BP	GO:0035051	cardiocyte differentiation	19/854	167/18670	0.000235285	0.0045626	0.00351264	G6PD/MYLK3/RGS4/VEGFA/AGT/LMNA/GREM1/ALPK2/PRICKLE1/TTN/SOX17/CXADR/PDGFRB/EFNB2/TGFB2/JAG1/MYH10/NOX4/IGF1	19
BP	GO:2000377	regulation of reactive oxygen species metabolic process	21/854	195/18670	0.000244244	0.00471872	0.00363284	G6PD/PTGS2/CAV1/PLIN5/ASS1/THBS1/AKR1C3/DUOXA2/AGT/CRYAB/F2/ICAM1/PON3/XDH/BCO2/PDGFRB/F2RL1/AGXT2/SLC30A10/ACE2/NOX4	21
BP	GO:0046364	monosaccharide biosynthetic process	13/854	91/18670	0.000246684	0.00474822	0.00365554	RBP4/PGD/G6PD/SORD/TKT/GPI/GOT1/PCK2/ALDOB/LEPR/PPARGC1A/ATF3/SLC37A4	13
BP	GO:2000027	regulation of animal organ morphogenesis	25/854	253/18670	0.00025557	0.0049011	0.00377325	BASP1/SHH/VEGFA/EYA1/PSMA6/AGT/PTK7/CPB2/GREM1/HPN/FGF7/PLEKHA4/CTHRC1/PRICKLE1/SFRP2/SOX17/TNFRSF11B/ROR2/ROBO2/ROBO1/TGFB2/JAG1/HGF/SULF2/FGF10	25
BP	GO:0061138	morphogenesis of a branching epithelium	20/854	182/18670	0.000260216	0.00497185	0.00382772	EGF/SOCS3/SHH/VEGFA/EYA1/AGT/FGF7/GLI2/CTSH/SFRP2/ESRP2/DLL4/FAT4/COL4A1/HGF/HHIP/DCHS1/TCF21/TGM2/FGF10	20
BP	GO:0002685	regulation of leukocyte migration	21/854	196/18670	0.000262058	0.00498019	0.00383413	ZP3/SERPINE1/CCL2/THBS1/ECM1/THY1/VEGFA/GREM1/ICAM1/CXCL10/SMPD3/ANXA1/DUSP1/MSN/NBL1/F2RL1/CCL19/THBS4/TNFSF18/SWAP70/TRPV4	21
BP	GO:0034367	protein-containing complex remodeling	7/854	29/18670	0.000263527	0.00498019	0.00383413	ALB/APOB/AGT/APOA1/PLA2G2A/SCARB1/LIPG	7
BP	GO:0035025	positive regulation of Rho protein signal transduction	7/854	29/18670	0.000263527	0.00498019	0.00383413	COL3A1/F2R/APOA1/ADGRG1/PDGFRB/ROBO1/F2RL1	7
BP	GO:0050892	intestinal absorption	8/854	38/18670	0.000266934	0.00499918	0.00384876	AKR1C1/APOA1/GCNT3/SCARB1/ADRA2A/F11R/NPC1L1/SLC5A1	8
BP	GO:0019932	second-messenger-mediated signaling	37/854	439/18670	0.000269002	0.00499918	0.00384876	GHRHR/LGR5/CCRL2/SELE/CHP1/SPINK1/APLNR/THBS1/GUCA2B/CACNA1C/LMCD1/VEGFA/AGT/RCAN1/ADGRG7/SAMD14/PLCG2/CXCL10/CDH13/CXCR4/ADRA2A/NFATC1/ADGRG1/SLC9A3R1/ANK2/GPHA2/GUCY1A2/ADGRF1/MCTP1/APLP1/ADGRG5/DEFB1/PDE10A/DMPK/FHL2/PCLO/IGF1	37
BP	GO:0019229	regulation of vasoconstriction	10/854	58/18670	0.000269574	0.00499918	0.00384876	HTR2A/FGG/PTGS2/FGA/CAV1/F2R/AGT/ICAM1/ADRA2A/ACE2	10
BP	GO:0055081	anion homeostasis	10/854	58/18670	0.000269574	0.00499918	0.00384876	ATP6V1B1/ABCC2/GOT1/SFRP4/APOA1/SLC7A11/LIPG/SLC12A7/SLC9A3R1/RCN3	10
BP	GO:1902041	regulation of extrinsic apoptotic signaling pathway via death domain receptors	10/854	58/18670	0.000269574	0.00499918	0.00384876	FGG/ITPRIP/FGA/SERPINE1/THBS1/ICAM1/SFRP2/ATF3/HGF/PEA15	10
BP	GO:0003177	pulmonary valve development	6/854	21/18670	0.000270304	0.00499918	0.00384876	NFATC1/HEYL/ROBO2/ROBO1/TGFB2/JAG1	6
BP	GO:0050863	regulation of T cell activation	29/854	314/18670	0.000272958	0.00503036	0.00387276	LGALS9C/ZP3/IRF4/CAV1/CCL2/THY1/CD83/SHH/LGALS9B/EGR3/RUNX1/LGALS1/GLI2/HHLA2/CD1D/LILRB2/ANXA1/EFNB2/VNN1/PAK3/SMAD7/IGFBP2/EFNB1/ZEB1/CCL19/TNFSF18/HLA-DMB/IGF1/TREX1	29
BP	GO:0003012	muscle system process	39/854	472/18670	0.000277712	0.00509989	0.00392629	HTR2A/CCN2/G6PD/PTGS2/CAV1/CKMT2/COMP/F2R/MYH1/RGS4/CACNA1C/LMCD1/AGT/KLHL41/HOMER1/LMNA/TPM4/CRYAB/STC1/NR4A3/SGCA/TTN/CXCR4/ADRA2A/PPP1R13L/KCNJ3/ANK2/PPARGC1A/MYH2/SMAD7/EHD3/DMPK/ACE2/CALD1/BIN1/SULF2/IGF1/ACTA2/VIM	39
BP	GO:0010755	regulation of plasminogen activation	5/854	14/18670	0.00028042	0.0051134	0.00393669	SERPINE1/SERPINE2/THBS1/CPB2/HPN	5
BP	GO:0042574	retinal metabolic process	5/854	14/18670	0.00028042	0.0051134	0.00393669	AKR1C1/AKR1C3/BCO1/BCO2/ALDH1A2	5
BP	GO:0008038	neuron recognition	9/854	48/18670	0.000282384	0.0051134	0.00393669	EPHA3/GAP43/EPHB3/PALLD/CXCR4/NRCAM/ROBO2/ROBO1/VSTM2L	9
BP	GO:0035272	exocrine system development	9/854	48/18670	0.000282384	0.0051134	0.00393669	SHH/FGF7/TFCP2L1/TGFB3/ESRP2/TGFB2/HGF/TGM2/FGF10	9
BP	GO:0042593	glucose homeostasis	24/854	241/18670	0.00030016	0.00541519	0.00416904	RBP4/GHRHR/GCLM/ERO1B/NGFR/CPB2/GJB6/LGALS1/ENDOG/ICAM1/FAM3B/PCK2/ADRA2A/SSTR5/PLSCR3/GCLC/LEPR/SERPINF1/FOXA2/PPARGC1A/PDK4/LRP1/NOX4/TRPV4	24
BP	GO:0031099	regeneration	21/854	198/18670	0.000301134	0.00541519	0.00416904	UGT1A1/GAP43/THY1/NR0B2/CPB2/SPP1/APOA1/VTN/NR4A3/SGCA/BAAT/NINJ2/ANXA1/HGF/MAP1B/LRP1/TM4SF4/SULF2/FGF10/IGF1/KLK6	21
BP	GO:0033273	response to vitamin	13/854	93/18670	0.00030707	0.0055029	0.00423656	CYP1A1/PTGS2/COL1A1/PHEX/STC2/SPP1/STC1/SPARC/CXCL10/LRAT/ALDH1A2/PENK/MAP1B	13
BP	GO:0043271	negative regulation of ion transport	18/854	157/18670	0.00030922	0.0055224	0.00425157	HTR2A/HTR1B/PTGS2/CAV1/SERPINE2/SPINK1/THBS1/RGS4/SFRP4/STC1/GRM7/ICAM1/ADRA2A/LILRB2/SLC9A3R1/RRAD/HECW1/BIN1	18
BP	GO:0006936	muscle contraction	32/854	363/18670	0.000312728	0.00556591	0.00428507	HTR2A/CCN2/PTGS2/CAV1/CKMT2/COMP/F2R/MYH1/CACNA1C/AGT/KLHL41/HOMER1/TPM4/CRYAB/STC1/SGCA/TTN/CXCR4/ADRA2A/PPP1R13L/KCNJ3/ANK2/MYH2/SMAD7/EHD3/DMPK/ACE2/CALD1/BIN1/SULF2/ACTA2/VIM	32
BP	GO:0033500	carbohydrate homeostasis	24/854	242/18670	0.000319147	0.00564353	0.00434483	RBP4/GHRHR/GCLM/ERO1B/NGFR/CPB2/GJB6/LGALS1/ENDOG/ICAM1/FAM3B/PCK2/ADRA2A/SSTR5/PLSCR3/GCLC/LEPR/SERPINF1/FOXA2/PPARGC1A/PDK4/LRP1/NOX4/TRPV4	24
BP	GO:0009101	glycoprotein biosynthetic process	31/854	348/18670	0.000322036	0.00564353	0.00434483	VCAN/EXTL1/CHP1/BGN/B4GALNT2/B3GNT9/CANT1/ST3GAL5/GALNT3/FUT9/GAL3ST1/CHST12/GCNT3/GALNT12/ENTPD5/CHST8/MUC13/NDST4/MUC20/GALNT4/CHST4/ST6GALNAC5/CCL19/B3GNT3/GXYLT2/B3GALT2/ASGR2/IGF1/B3GALT5/TREX1/MGAT3	31
BP	GO:0008207	C21-steroid hormone metabolic process	8/854	39/18670	0.000322505	0.00564353	0.00434483	AKR1C2/CYP17A1/AKR1C1/AKR1C3/AKR1C4/PPARGC1A/EGR1/DKK3	8
BP	GO:1902042	negative regulation of extrinsic apoptotic signaling pathway via death domain receptors	8/854	39/18670	0.000322505	0.00564353	0.00434483	FGG/ITPRIP/FGA/SERPINE1/ICAM1/SFRP2/HGF/PEA15	8
BP	GO:0007179	transforming growth factor beta receptor signaling pathway	21/854	199/18670	0.000322519	0.00564353	0.00434483	PEG10/COL3A1/CAV1/THBS1/COL1A2/GOT1/CD109/TGFB3/LTBP1/LTBP2/F11R/HPGD/TGFB2/CDKN2B/SMAD7/RASL11B/LRG1/ZEB1/DKK3/HTRA3/HSPA1A	21
BP	GO:0034599	cellular response to oxidative stress	28/854	302/18670	0.000324391	0.00565725	0.00435539	G6PD/MGST1/DPEP1/AKR1C3/NQO1/SOD3/PPARGC1B/MMP2/ENDOG/TXN/NR4A3/SMPD3/SLC7A11/GPX2/SRXN1/GJB2/SLC25A24/ANXA1/PPARGC1A/VNN1/HGF/MSRB3/PENK/NOX4/HSPA1B/HSPA1A/TREX1/MGAT3	28
BP	GO:0042759	long-chain fatty acid biosynthetic process	7/854	30/18670	0.00033028	0.00574069	0.00441963	CYP1A1/PTGS2/ALOX15B/HPGD/ELOVL6/CYP2C8/CYP2C9	7
BP	GO:0001894	tissue homeostasis	23/854	229/18670	0.000351947	0.00609689	0.00469386	RBP4/ALB/CCN2/PTGS2/WWTR1/F2R/VEGFA/HOMER1/PPARGC1B/CDH3/SPP1/TMEM119/ADGRV1/CTSH/RDH12/TNFRSF11B/MUC13/LTF/CXADR/CA2/RCN3/PDK4/NOX4	23
BP	GO:0042440	pigment metabolic process	11/854	71/18670	0.00035685	0.00616129	0.00474344	UGT1A9/UGT1A8/UGT1A7/UGT1A4/AMBP/UGT1A1/CDH3/HMBS/SLC7A11/TYRP1/PPARGC1A	11
BP	GO:0051896	regulation of protein kinase B signaling	24/854	244/18670	0.000360316	0.00620054	0.00477365	AKR1C2/FAM110C/EGF/FGF5/THBS1/FGF19/AKR1C3/EREG/FGF7/TXN/XDH/SLC9A3R1/C1QTNF1/CAVIN3/PDGFRB/TGFA/HGF/MEIS3/RCN3/MYORG/CCL19/NOX4/HIP1/FGF10	24
BP	GO:0070374	positive regulation of ERK1 and ERK2 cascade	22/854	215/18670	0.000362254	0.00621332	0.00478349	HTR2A/FGG/FFAR4/CCN2/ALKAL2/CCL15/FGA/CCL2/FGF19/F2R/CD44/ICAM1/PLA2G2A/CAVIN3/PDGFRB/F2RL1/SLC30A10/CCL19/LRP1/NOX4/TRPV4/FGF10	22
BP	GO:2001234	negative regulation of apoptotic signaling pathway	23/854	230/18670	0.00037458	0.006364	0.0048995	FGG/GCLM/ITPRIP/PTGS2/FGA/SERPINE1/THBS1/EYA1/LMNA/CD44/ICAM1/BDNF/SFRP2/SCG2/GCLC/VNN1/HGF/MEIS3/HSPA1B/HSPA1A/FGF10/PEA15/IGF1	23
BP	GO:0045834	positive regulation of lipid metabolic process	17/854	146/18670	0.000374713	0.006364	0.0048995	CCN1/HTR2A/ZP3/EEF1A2/PTGS2/PLIN5/AGT/APOA1/F2/AADAC/NR4A3/SMPD3/SCARB1/ANXA1/PPARGC1A/PDGFRB/CCL19	17
BP	GO:0055123	digestive system development	17/854	146/18670	0.000374713	0.006364	0.0048995	CYP1A1/COL3A1/ASS1/SHH/EPHB3/GLI2/NPY/SFRP2/SOX17/TGFB3/FAT4/ALDH1A2/TGFB2/DCHS1/COBL/TCF21/FGF10	17
BP	GO:0071277	cellular response to calcium ion	12/854	83/18670	0.000377783	0.00637695	0.00490947	DPEP1/AKR1C3/ENDOG/ADGRV1/SYT8/JUND/RASGRP2/SLC25A24/CPNE2/JUNB/FOSB/SYT13	12
BP	GO:0044070	regulation of anion transport	13/854	95/18670	0.000379625	0.00637695	0.00490947	CCK/SLC38A3/THBS1/RGS4/AGT/SFRP4/STC1/APOA1/GRM7/ABCB1/CA2/PDZK1/ACE2	13
BP	GO:0055006	cardiac cell development	13/854	95/18670	0.000379625	0.00637695	0.00490947	G6PD/MYLK3/RGS4/VEGFA/AGT/LMNA/ALPK2/TTN/CXADR/PDGFRB/JAG1/MYH10/IGF1	13
BP	GO:0017015	regulation of transforming growth factor beta receptor signaling pathway	15/854	120/18670	0.000380384	0.00637695	0.00490947	PEG10/CAV1/THBS1/GOT1/CD109/TGFB3/LTBP1/CDKN2B/SMAD7/RASL11B/LRG1/ZEB1/DKK3/HTRA3/HSPA1A	15
BP	GO:0045765	regulation of angiogenesis	33/854	383/18670	0.000382996	0.0064001	0.00492729	NGFR/PTGS2/SERPINE1/ANGPTL4/APLNR/THBS1/ECM1/VEGFA/AGT/RUNX1/APOH/SPARC/HTATIP2/CXCL10/CTSH/THBS2/SFRP2/CXCR4/HHEX/ADGRA2/EPHA1/JCAD/ANXA1/ITGA5/SERPINF1/DLL4/HYAL1/TGFB2/HGF/ISM1/LRG1/THBS4/COL4A2	33
BP	GO:0016054	organic acid catabolic process	26/854	275/18670	0.000387525	0.0064344	0.0049537	TAT/ABHD3/PGD/SORD/GLDC/PHYH/CHP1/PLIN5/GOT1/ALDH3A2/GLYATL2/ABCD3/ABHD2/CYP4F12/PON1/CD44/CYP4F3/PCK2/PON3/HGD/PPM1K/ACMSD/TST/HYAL1/AGXT2/SLC27A2	26
BP	GO:0046395	carboxylic acid catabolic process	26/854	275/18670	0.000387525	0.0064344	0.0049537	TAT/ABHD3/PGD/SORD/GLDC/PHYH/CHP1/PLIN5/GOT1/ALDH3A2/GLYATL2/ABCD3/ABHD2/CYP4F12/PON1/CD44/CYP4F3/PCK2/PON3/HGD/PPM1K/ACMSD/TST/HYAL1/AGXT2/SLC27A2	26
BP	GO:0042110	T cell activation	38/854	464/18670	0.000393425	0.00651156	0.0050131	LGALS9C/ZP3/IRF4/CAV1/CCL2/THY1/CD83/SHH/LGALS9B/EGR3/RUNX1/LGALS1/GLI2/CD44/ICAM1/HHLA2/CD1D/LILRB2/LEPR/ANXA1/CXADR/DLL4/ZFP36L1/MSN/EFNB2/F2RL1/VNN1/PAK3/EGR1/SMAD7/IGFBP2/EFNB1/ZEB1/CCL19/TNFSF18/HLA-DMB/IGF1/TREX1	38
BP	GO:0032526	response to retinoic acid	14/854	108/18670	0.000405229	0.00667848	0.00514161	RBP4/BRINP1/COL1A1/EPHA3/PTK7/CTSH/IGFBP7/LRAT/GJB2/SERPINF1/DUSP1/ALDH1A2/PDGFRB/IGFBP2	14
BP	GO:0042180	cellular ketone metabolic process	24/854	246/18670	0.000406081	0.00667848	0.00514161	UGT1A8/AKR1C2/CYP17A1/AKR1C1/CYP2B6/PTGS2/CAV1/AKR1B10/PLIN5/FGF19/AKR1C3/NQO1/PSMA6/AKR1C4/NR4A3/SLC7A11/ANXA1/ACMSD/CYP4F11/PPARGC1A/EGR1/PDK4/DKK3/TREX1	24
BP	GO:0033687	osteoblast proliferation	7/854	31/18670	0.00040993	0.00671017	0.00516601	CCN1/NELL1/GREM1/TMEM119/CTHRC1/LTF/JUNB	7
BP	GO:0017157	regulation of exocytosis	22/854	217/18670	0.000411881	0.00671017	0.00516601	HTR2A/FGG/ZP3/HTR1B/FGA/RAB3B/TRIM9/DGKI/SYT8/SMPD3/VAMP8/RIMS1/ADRA2A/ANXA1/SDC1/RAB27B/F2RL1/TRPV6/NCS1/PCLO/PPFIA2/SYT13	22
BP	GO:0060348	bone development	22/854	217/18670	0.000411881	0.00671017	0.00516601	MEF2D/COL1A1/COMP/PAPPA2/PHEX/SPNS2/GREM1/COL14A1/SFRP4/STC1/TMEM119/SPARC/SMPD3/SFRP2/LTF/TGFB3/NAB1/FAT4/DCHS1/TRPV4/SULF2/IGF1	22
BP	GO:0010811	positive regulation of cell-substrate adhesion	15/854	121/18670	0.000416243	0.00673898	0.00518819	CCN1/FGG/FGA/THY1/VEGFA/FN1/APOA1/VTN/CDH13/COL16A1/EPHA1/CCDC80/EDIL3/ITGA5/COL8A1	15
BP	GO:0046718	viral entry into host cell	15/854	121/18670	0.000416243	0.00673898	0.00518819	HTR2A/CAV1/LGALS1/ICAM1/VAMP8/SCARB1/CXCR4/F11R/ITGA5/CXADR/EFNB2/HYAL1/ACE2/HSPA1B/HSPA1A	15
BP	GO:0003018	vascular process in circulatory system	19/854	175/18670	0.000427671	0.0069025	0.00531408	HTR2A/FGG/GCLM/HTR1B/PTGS2/FGA/CAV1/MYLK3/COMP/F2R/VEGFA/AGT/ICAM1/ADRA2A/GCLC/F2RL1/ACE2/TRPV4/ACTA2	19
BP	GO:0003015	heart process	27/854	292/18670	0.000429274	0.00690692	0.00531748	CCN2/CACNA2D3/WWTR1/CAV1/TMIGD3/RGS4/CACNA1C/AGT/STC1/TTN/KCNK6/CXCR4/SLC1A1/CACNB1/PPP1R13L/CXADR/KCNJ3/ANK2/TGFB2/SMAD7/EHD3/KCNIP3/DMPK/ACE2/BIN1/NOX4/TREX1	27
BP	GO:0001889	liver development	16/854	135/18670	0.000451898	0.00724633	0.00557878	CYP1A1/UGT1A1/ASS1/CPB2/HPN/ACO2/VTN/FRZB/BAAT/PCK2/ANXA1/AK4/ALDH1A2/HGF/COBL/SULF2	16
BP	GO:0090102	cochlea development	9/854	51/18670	0.000453157	0.00724633	0.00557878	EYA1/PTK7/HPN/GLI2/CTHRC1/FRZB/GABRB3/DCHS1/ZEB1	9
BP	GO:1903844	regulation of cellular response to transforming growth factor beta stimulus	15/854	122/18670	0.00045496	0.00725284	0.0055838	PEG10/CAV1/THBS1/GOT1/CD109/TGFB3/LTBP1/CDKN2B/SMAD7/RASL11B/LRG1/ZEB1/DKK3/HTRA3/HSPA1A	15
BP	GO:0016049	cell growth	39/854	484/18670	0.000456608	0.00725685	0.00558689	G6PD/OSGIN1/SERPINE2/INHBA/PAPPA2/LPAR3/RGS4/VEGFA/AGT/SGK2/FN1/CRYAB/HPN/SPP1/F2/KRT17/SCGB3A1/FRZB/BDNF/SEMA5B/CRABP2/SFRP2/SOX17/CXCR4/RIMS1/IGFBP7/RASGRP2/NRCAM/HYAL1/TGFB2/COBL/MAP1B/CDHR2/LRP1/SEMA6C/HSPA1B/HSPA1A/SPOCK1/IGF1	39
BP	GO:0009069	serine family amino acid metabolic process	8/854	41/18670	0.000461963	0.00731958	0.00563518	GCLM/GLDC/BAAT/SLC7A11/GGT1/GCLC/TST/AGXT2	8
BP	GO:0060445	branching involved in salivary gland morphogenesis	6/854	23/18670	0.000464936	0.00734429	0.0056542	SHH/FGF7/ESRP2/HGF/TGM2/FGF10	6
BP	GO:0032835	glomerulus development	10/854	62/18670	0.000471065	0.00741856	0.00571138	WWTR1/BASP1/HEYL/PDGFRB/JAG1/EGR1/TCF21/SULF2/ACTA2/NOTCH3	10
BP	GO:0015718	monocarboxylic acid transport	18/854	163/18670	0.000488857	0.0076755	0.00590919	PLIN2/SLC51A/SLC38A3/AKR1C1/SLCO1B1/ABCC2/THBS1/LCN12/ABCD3/AKR1C4/PLA2G2A/ANXA1/SLC9A3R1/SLC16A13/STARD5/SLC10A2/ABCC3/SLC27A2	18
BP	GO:0008210	estrogen metabolic process	7/854	32/18670	0.000504207	0.00786896	0.00605813	UGT2B11/CYP1A1/UGT1A1/AKR1B15/CYP3A7/CYP2C8/CYP2C9	7
BP	GO:0045907	positive regulation of vasoconstriction	7/854	32/18670	0.000504207	0.00786896	0.00605813	HTR2A/FGG/PTGS2/FGA/CAV1/F2R/ICAM1	7
BP	GO:0008360	regulation of cell shape	17/854	150/18670	0.000514124	0.00799732	0.00615696	CCL2/VEGFA/FN1/RHOU/HPN/F2/ICAM1/S100A13/CDC42EP3/ANXA1/SLC9A3R1/RND3/SHROOM3/MSN/FBLIM1/MYH10/PALM	17
BP	GO:0060191	regulation of lipase activity	13/854	98/18670	0.00051551	0.00799732	0.00615696	CCN1/HTR2A/ANG/SELE/PLIN5/ANGPTL4/AGT/APOH/APOA1/BDNF/ANXA1/PDGFRB/LRP1	13
BP	GO:0045861	negative regulation of proteolysis	31/854	358/18670	0.000522534	0.00808216	0.00622227	TIMP1/ITIH1/NGFR/PTGS2/SERPINE1/AMBP/SERPINE2/DPEP1/SPINK1/THBS1/ECM1/SHH/VEGFA/AGT/CPB2/CRYAB/VTN/F2/CD44/CD109/SFRP2/TIMP2/LTF/PAPLN/SERPINF1/SLPI/SERPINA6/HGF/CST1/BIN1/SPOCK1	31
BP	GO:0003179	heart valve morphogenesis	9/854	52/18670	0.000526087	0.00809109	0.00622915	CCN1/NFATC1/DLL4/HEYL/ROBO2/ROBO1/TGFB2/JAG1/DCHS1	9
BP	GO:0006633	fatty acid biosynthetic process	18/854	164/18670	0.000526225	0.00809109	0.00622915	ABHD3/CYP1A1/PTGS2/CBR1/AKR1C3/ABCD3/ABHD2/ALOX15B/FADS2/ELOVL7/LIPG/HPGD/ELOVL6/ANXA1/CYP2C8/CYP2C9/FA2H/PDK4	18
BP	GO:1901617	organic hydroxy compound biosynthetic process	25/854	266/18670	0.000543029	0.00832484	0.00640911	G6PD/TM7SF2/APOB/MOXD1/FGF19/AKR1C3/GOT1/AKR1C4/CES1/CDH3/CYP51A1/APOA1/SPR/PLCG2/BAAT/SLC7A11/PCK2/HMGCS2/ELOVL6/TYRP1/TGFB2/SLC27A2/NPC1L1/MSMO1/DKK3	25
BP	GO:0034284	response to monosaccharide	21/854	207/18670	0.000547044	0.00835291	0.00643072	GHRHR/GCLM/CCN2/PTGS2/THBS1/NR0B2/CPB2/GJB6/LGALS1/ENDOG/SPARC/ICAM1/PCK2/ADRA2A/GCLC/SERPINF1/FOXA2/PPARGC1A/EGR1/LRP1/NOX4	21
BP	GO:0010470	regulation of gastrulation	8/854	42/18670	0.000548074	0.00835291	0.00643072	PHLDB1/APOA1/COL5A1/SFRP2/SOX17/IL1RN/COL5A2/FOXA2	8
BP	GO:1901654	response to ketone	20/854	193/18670	0.000560144	0.0085119	0.00655312	AKR1C2/CAV1/ABCC2/ASS1/THBS1/AKR1C3/ABHD2/SPP1/ICAM1/PCK2/IGFBP7/CA9/GJB2/TGFB3/SERPINF1/DUSP1/MSN/TGFB2/CCL19/FOSB	20
BP	GO:0050954	sensory perception of mechanical stimulus	18/854	165/18670	0.00056603	0.00854787	0.00658082	HTR2A/ATP6V1B1/COL1A1/SERPINE2/NAV2/EYA1/HPN/GJB6/GRM7/ICAM1/GABRB3/ADGRV1/CXCR4/GJB2/SLC9A3R1/LRP2/TPRN/PIEZO2	18
BP	GO:0019372	lipoxygenase pathway	5/854	16/18670	0.000566797	0.00854787	0.00658082	PTGS2/ALOX15B/PON1/PON3/HPGD	5
BP	GO:0030301	cholesterol transport	13/854	99/18670	0.000569091	0.00854787	0.00658082	AKR1C1/CAV1/EGF/APOB/SHH/CES1/PON1/APOA1/SCARB1/LIPG/STARD5/NPC1L1/LRP1	13
BP	GO:1901570	fatty acid derivative biosynthetic process	13/854	99/18670	0.000569091	0.00854787	0.00658082	PTGS2/CBR1/AKR1C3/MGST2/ELOVL7/GGT1/HMGCS2/HPGD/ELOVL6/ANXA1/CYP2C8/BDH1/CYP2C9	13
BP	GO:0042303	molting cycle	14/854	112/18670	0.000588796	0.00876783	0.00675016	LGR5/PTGS2/INHBA/SHH/CDH3/FGF7/KRT17/CD109/PPP1R13L/TRPV3/TGFB2/FA2H/APCDD1/FGF10	14
BP	GO:0042633	hair cycle	14/854	112/18670	0.000588796	0.00876783	0.00675016	LGR5/PTGS2/INHBA/SHH/CDH3/FGF7/KRT17/CD109/PPP1R13L/TRPV3/TGFB2/FA2H/APCDD1/FGF10	14
BP	GO:1990748	cellular detoxification	14/854	112/18670	0.000588796	0.00876783	0.00675016	ALB/MGST1/PTGS2/AKR1B10/GSTA1/NQO1/SOD3/MGST2/DUOX2/TXN/GPX2/PXDN/RDH12/SRXN1	14
BP	GO:0002092	positive regulation of receptor internalization	6/854	24/18670	0.000596121	0.00882633	0.00679519	SELE/EGF/VEGFA/GREM1/SFRP4/PLCG2	6
BP	GO:0046697	decidualization	6/854	24/18670	0.000596121	0.00882633	0.00679519	PTGS2/STC2/SPP1/STC1/GJB2/JUNB	6
BP	GO:0022408	negative regulation of cell-cell adhesion	19/854	180/18670	0.000607466	0.00896876	0.00690484	LGALS9C/FGG/SERPINE2/ASS1/B4GALNT2/PLG/SHH/VEGFA/LGALS9B/RUNX1/APOA1/IL1RN/LILRB2/ANXA1/C1QTNF1/JAG1/SMAD7/SWAP70/TRPV4	19
BP	GO:0046579	positive regulation of Ras protein signal transduction	10/854	64/18670	0.00061121	0.00899846	0.00692771	COL3A1/F2R/DGKI/APOA1/ADGRG1/PDGFRB/ROBO1/F2RL1/FGF10/IGF1	10
BP	GO:0043616	keratinocyte proliferation	8/854	43/18670	0.000646715	0.00944108	0.00726848	CDH3/EREG/FGF7/CD109/CDH13/ZFP36L1/EFNB2/FGF10	8
BP	GO:0051602	response to electrical stimulus	8/854	43/18670	0.000646715	0.00944108	0.00726848	EEF1A2/NQO1/GJB6/S100A13/ADSS1/KCNJ3/PPARGC1A/PALM	8
BP	GO:0007492	endoderm development	11/854	76/18670	0.000648753	0.00944108	0.00726848	INHBA/MMP2/FN1/VTN/COL5A1/SOX17/COL5A2/ITGA5/ZFP36L1/COL8A1/COL4A2	11
BP	GO:1904035	regulation of epithelial cell apoptotic process	12/854	88/18670	0.00065035	0.00944108	0.00726848	FGG/FGA/SERPINE1/CCL2/ANGPTL4/THBS1/AKR1C3/SFRP4/ICAM1/SCG2/ZFP36L1/PPARGC1A	12
BP	GO:0051147	regulation of muscle cell differentiation	19/854	181/18670	0.000650357	0.00944108	0.00726848	G6PD/MYLK3/RGS4/CDH2/SHH/GREM1/EREG/TMEM119/SCGB3A1/BDNF/CXCL10/OLFM2/NFATC1/EFNB2/BOC/EHD2/ZEB1/DMPK/IGF1	19
BP	GO:0051604	protein maturation	26/854	285/18670	0.000665759	0.00963774	0.00741988	FGG/ERO1B/FGA/SERPINE1/SERPINE2/COMP/THBS1/PERP/H2BC1/SHH/DUOXA2/CES1/CPB2/HPN/APOH/TFR2/CTSH/NKD2/GGT1/PRSS3/CPZ/C1R/ADAMTS2/ACE2/AEBP1/KLK6	26
BP	GO:0048568	embryonic organ development	35/854	428/18670	0.000674482	0.00973689	0.00749621	RBP4/CCN1/PHLDA2/ATP6V1B1/SOCS3/SHH/VEGFA/EYA1/NRK/PTK7/HPN/GJB6/GLI2/CTHRC1/FRZB/NR4A3/SOX17/COL5A2/GJB5/TGFB3/MFAP2/PPP1R13L/SLC9A3R1/ZFP36L1/ALDH1A2/ROR2/HYAL1/TGFB2/EFEMP1/MDFI/JUNB/COBL/ZEB1/TCF21/FGF10	35
BP	GO:0072073	kidney epithelium development	16/854	140/18670	0.000677149	0.00974832	0.00750501	CRLF1/WWTR1/BASP1/SHH/VEGFA/EYA1/AGT/SDC1/FAT4/HEYL/EFNB2/ROBO2/JAG1/DCHS1/SMAD7/TCF21	16
BP	GO:0001763	morphogenesis of a branching structure	20/854	196/18670	0.000681669	0.00978628	0.00753424	EGF/SOCS3/SHH/VEGFA/EYA1/AGT/FGF7/GLI2/CTSH/SFRP2/ESRP2/DLL4/FAT4/COL4A1/HGF/HHIP/DCHS1/TCF21/TGM2/FGF10	20
BP	GO:0006636	unsaturated fatty acid biosynthetic process	9/854	54/18670	0.000700873	0.0100163	0.00771129	PTGS2/CBR1/AKR1C3/ALOX15B/FADS2/ELOVL7/HPGD/ELOVL6/ANXA1	9
BP	GO:0009914	hormone transport	28/854	317/18670	0.000701543	0.0100163	0.00771129	RBP4/FGG/FFAR4/GHRHR/FGA/ABCC2/INHBA/KCNS3/CACNA1C/AGT/NR0B2/SPP1/TFR2/TTR/SMPD3/VAMP8/FAM3B/ADRA2A/IL1RN/SSTR5/ANXA1/C1QTNF1/FOXA2/LRP1/PCLO/ILDR1/TRPV4/GRP	28
BP	GO:0060349	bone morphogenesis	14/854	114/18670	0.000704358	0.0100289	0.00772102	MEF2D/COL1A1/COMP/PAPPA2/COL14A1/SFRP4/STC1/TMEM119/SMPD3/SFRP2/LTF/TGFB3/NAB1/TRPV4	14
BP	GO:0090596	sensory organ morphogenesis	24/854	256/18670	0.000719851	0.010174	0.00783272	RBP4/ATP6V1B1/COL8A2/BCAR3/THY1/VEGFA/EYA1/PTK7/HPN/GJB6/GLI2/CTHRC1/COL5A1/FRZB/NR4A3/COL5A2/MFAP2/SLC9A3R1/COL8A1/ROR2/EFEMP1/JAG1/ZEB1/FGF10	24
BP	GO:0055013	cardiac muscle cell development	12/854	89/18670	0.000721041	0.010174	0.00783272	G6PD/MYLK3/RGS4/VEGFA/AGT/LMNA/ALPK2/TTN/CXADR/PDGFRB/MYH10/IGF1	12
BP	GO:0010749	regulation of nitric oxide mediated signal transduction	4/854	10/18670	0.000731541	0.010174	0.00783272	SPINK1/THBS1/VEGFA/GUCY1A2	4
BP	GO:0033690	positive regulation of osteoblast proliferation	4/854	10/18670	0.000731541	0.010174	0.00783272	CCN1/TMEM119/CTHRC1/LTF	4
BP	GO:0035376	sterol import	4/854	10/18670	0.000731541	0.010174	0.00783272	APOA1/SCARB1/STARD5/LRP1	4
BP	GO:0045741	positive regulation of epidermal growth factor-activated receptor activity	4/854	10/18670	0.000731541	0.010174	0.00783272	EGF/EREG/ADRA2A/TGFA	4
BP	GO:0060346	bone trabecula formation	4/854	10/18670	0.000731541	0.010174	0.00783272	COL1A1/PPARGC1B/GREM1/MMP2	4
BP	GO:0070508	cholesterol import	4/854	10/18670	0.000731541	0.010174	0.00783272	APOA1/SCARB1/STARD5/LRP1	4
BP	GO:0006865	amino acid transport	16/854	141/18670	0.000732167	0.010174	0.00783272	CCK/SLC38A3/SLC38A5/RGS4/SLC6A19/AGT/GRM7/SLC7A11/RIMS1/SLC43A1/SLC1A1/SLC6A9/ACE2/SLC3A1/PPFIA2/SLC36A2	16
BP	GO:0048660	regulation of smooth muscle cell proliferation	18/854	169/18670	0.000752295	0.010398	0.00800522	ANG/HTR1B/PTGS2/MEF2D/THBS1/AGT/MMP2/EREG/NR4A3/SMPD3/CDH13/TGFB3/HPGD/PPARGC1A/PDGFRB/TGM2/IGF1/NOTCH3	18
BP	GO:0006688	glycosphingolipid biosynthetic process	6/854	25/18670	0.000754294	0.010398	0.00800522	ST3GAL5/GAL3ST1/UGT8/FA2H/ST6GALNAC5/B3GALT2	6
BP	GO:0008211	glucocorticoid metabolic process	6/854	25/18670	0.000754294	0.010398	0.00800522	CYP17A1/APOA1/SERPINA6/HSD11B2/HSD11B1/DKK3	6
BP	GO:0001823	mesonephros development	13/854	102/18670	0.000758876	0.010406	0.00801135	CRLF1/BASP1/SHH/VEGFA/EYA1/AGT/SDC1/FAT4/ROBO2/DCHS1/SMAD7/TCF21/FGF10	13
BP	GO:0030148	sphingolipid biosynthetic process	13/854	102/18670	0.000758876	0.010406	0.00801135	CCN1/ALDH3A2/ST3GAL5/GAL3ST1/SMPD3/ELOVL7/ELOVL6/UGT8/CERKL/FA2H/DEGS2/ST6GALNAC5/B3GALT2	13
BP	GO:0072006	nephron development	16/854	142/18670	0.000790949	0.0108006	0.00831516	WWTR1/BASP1/SHH/VEGFA/EYA1/AGT/FAT4/HEYL/PDGFRB/JAG1/EGR1/DCHS1/TCF21/SULF2/ACTA2/NOTCH3	16
BP	GO:0098742	cell-cell adhesion via plasma-membrane adhesion molecules	25/854	273/18670	0.000792887	0.0108006	0.00831516	CDH18/SELE/CDH2/CDH11/PALLD/CDH3/APOA1/ICAM1/SCARF2/HMCN1/CDH13/PTPRT/IL1RN/ITGA5/CXADR/FAT4/SPARCL1/ROBO2/ROBO1/TGFB2/DCHS1/CDHR2/TENM2/VSTM2L/CLDN7	25
BP	GO:0010717	regulation of epithelial to mesenchymal transition	12/854	90/18670	0.000798045	0.0108006	0.00831516	WWTR1/COL1A1/EPHA3/GREM1/HPN/PHLDB1/SFRP2/TGFB3/FOXA2/TGFB2/JAG1/SMAD7	12
BP	GO:0046849	bone remodeling	12/854	90/18670	0.000798045	0.0108006	0.00831516	HTR1B/PPARGC1B/GREM1/SPP1/TMEM119/CTHRC1/TNFRSF11B/TGFB3/LEPR/CA2/PDK4/NOX4	12
BP	GO:0071674	mononuclear cell migration	12/854	90/18670	0.000798045	0.0108006	0.00831516	CCL15/SERPINE1/CCL2/THBS1/H2BC1/GREM1/CXCL10/ANXA1/DUSP1/NBL1/CCL19/TRPV4	12
BP	GO:0046456	icosanoid biosynthetic process	9/854	55/18670	0.00080454	0.0108602	0.00836105	PTGS2/CBR1/AKR1C3/MGST2/GGT1/HPGD/ANXA1/CYP2C8/CYP2C9	9
BP	GO:0010975	regulation of neuron projection development	39/854	499/18670	0.000820028	0.0110406	0.00849994	ALKAL2/NGFR/EPHA3/LPAR3/THY1/CDH2/ZNF365/VEGFA/AGT/PTK7/EPHB3/FN1/SPP1/LGALS1/BDNF/SEMA5B/CRABP2/SFRP2/DPYSL3/CXCR4/RIMS1/NRCAM/SERPINF1/STMN2/EFNB2/ROBO2/ROBO1/HGF/PAK3/COBL/HECW1/MAP1B/LRP1/SEMA6C/NCS1/TRPV4/SPOCK1/KLK6/VIM	39
BP	GO:1903708	positive regulation of hemopoiesis	19/854	185/18670	0.000849064	0.011402	0.00877816	INHBA/ZNF16/CD83/SHH/EGR3/PPARGC1B/RUNX1/GLI2/IL34/LILRB2/ANXA1/ZFP36L1/CA2/ROR2/VNN1/JAG1/CCL19/HSPA1B/HSPA1A	19
BP	GO:0035296	regulation of tube diameter	16/854	143/18670	0.000853702	0.0114054	0.00878073	HTR2A/FGG/GCLM/HTR1B/PTGS2/FGA/CAV1/COMP/F2R/AGT/ICAM1/ADRA2A/GCLC/F2RL1/ACE2/ACTA2	16
BP	GO:0097746	regulation of blood vessel diameter	16/854	143/18670	0.000853702	0.0114054	0.00878073	HTR2A/FGG/GCLM/HTR1B/PTGS2/FGA/CAV1/COMP/F2R/AGT/ICAM1/ADRA2A/GCLC/F2RL1/ACE2/ACTA2	16
BP	GO:0042063	gliogenesis	26/854	290/18670	0.000861222	0.0114763	0.00883537	SERPINE2/FGF5/CCL2/GAP43/CDH2/SHH/ZNF365/EGR2/VTN/F2/CXCR4/IL34/MXRA8/ADGRG1/LEPR/ANXA1/NAB1/ROR2/TGFB2/LRP2/FA2H/PENK/LRP1/BIN1/FGF10/VIM	26
BP	GO:0048659	smooth muscle cell proliferation	18/854	171/18670	0.00086366	0.0114794	0.00883772	ANG/HTR1B/PTGS2/MEF2D/THBS1/AGT/MMP2/EREG/NR4A3/SMPD3/CDH13/TGFB3/HPGD/PPARGC1A/PDGFRB/TGM2/IGF1/NOTCH3	18
BP	GO:0015807	L-amino acid transport	10/854	67/18670	0.000884601	0.0117277	0.00902892	SLC38A3/SLC38A5/RGS4/AGT/SLC7A11/SLC43A1/SLC1A1/SLC6A9/SLC3A1/SLC36A2	10
BP	GO:0060562	epithelial tube morphogenesis	28/854	322/18670	0.000893387	0.0118141	0.00909539	LGR5/EGF/SHH/VEGFA/EYA1/AGT/PTK7/GLI2/CTHRC1/CXCL10/CTSH/PRICKLE1/SFRP2/SOX17/CXCR4/ESRP2/DLL4/FAT4/SHROOM3/EFNB2/TGFB2/LRP2/COL4A1/HHIP/DCHS1/COBL/TCF21/FGF10	28
BP	GO:0030308	negative regulation of cell growth	19/854	186/18670	0.000906193	0.011953	0.00920235	G6PD/OSGIN1/SERPINE2/INHBA/RGS4/AGT/CRYAB/SPP1/SCGB3A1/FRZB/SEMA5B/SFRP2/SOX17/HYAL1/TGFB2/CDHR2/SEMA6C/HSPA1B/HSPA1A	19
BP	GO:0035150	regulation of tube size	16/854	144/18670	0.000920637	0.0120822	0.00930181	HTR2A/FGG/GCLM/HTR1B/PTGS2/FGA/CAV1/COMP/F2R/AGT/ICAM1/ADRA2A/GCLC/F2RL1/ACE2/ACTA2	16
BP	GO:0071322	cellular response to carbohydrate stimulus	16/854	144/18670	0.000920637	0.0120822	0.00930181	GHRHR/GCLM/CPB2/GJB6/LGALS1/ENDOG/ICAM1/PCK2/ADRA2A/GCLC/SERPINF1/FOXA2/ZFP36L1/PPARGC1A/LRP1/NOX4	16
BP	GO:0032967	positive regulation of collagen biosynthetic process	6/854	26/18670	0.000943016	0.0123137	0.00948005	CCN2/F2R/F2/TGFB3/PDGFRB/VIM	6
BP	GO:0034114	regulation of heterotypic cell-cell adhesion	6/854	26/18670	0.000943016	0.0123137	0.00948005	FGG/FGA/THY1/APOA1/CD44/IL1RN	6
BP	GO:0001505	regulation of neurotransmitter levels	30/854	355/18670	0.000945609	0.0123166	0.00948228	HTR2A/LIN7A/HTR1B/PTGS2/GLDC/CAV1/ASS1/RAB3B/MOXD1/RGS4/NQO1/AGT/TRIM9/DGKI/ICAM1/SPR/SYT8/BAAT/SLC7A11/CHKA/RIMS1/UNC13C/SLC1A1/SLC6A9/AGXT2/GCHFR/MCTP1/NCS1/PCLO/PPFIA2	30
BP	GO:0009746	response to hexose	20/854	202/18670	0.000994296	0.0128364	0.00988246	GHRHR/GCLM/CCN2/PTGS2/THBS1/NR0B2/CPB2/GJB6/LGALS1/ENDOG/ICAM1/PCK2/ADRA2A/GCLC/SERPINF1/FOXA2/PPARGC1A/EGR1/LRP1/NOX4	20
BP	GO:0033627	cell adhesion mediated by integrin	10/854	68/18670	0.000995396	0.0128364	0.00988246	SERPINE1/VTN/ICAM1/COL16A1/SFRP2/ITGA5/ITGA11/ITGBL1/TGFB2/SWAP70	10
BP	GO:0035924	cellular response to vascular endothelial growth factor stimulus	10/854	68/18670	0.000995396	0.0128364	0.00988246	VEGFA/EGR3/NR4A1/XDH/ADGRA2/JCAD/ANXA1/DLL4/PDGFRB/ROBO1	10
BP	GO:0050918	positive chemotaxis	10/854	68/18670	0.000995396	0.0128364	0.00988246	CCL15/VEGFA/FGF7/CXCL10/CDH13/SCG2/F2RL1/HGF/LRP1/FGF10	10
BP	GO:0007009	plasma membrane organization	13/854	105/18670	0.000999246	0.0128542	0.00989612	CAV1/XKR9/COL5A1/CXCR4/PLSCR3/FAT4/ANK2/TGFB2/ANO3/FA2H/EHD2/MYH10/BIN1	13
BP	GO:0071695	anatomical structure maturation	22/854	232/18670	0.00101343	0.0130045	0.0100118	FGG/GHRHR/G6PD/ANG/SPINK1/SLC26A3/ABHD2/VEGFA/GREM1/MMP2/CDH3/EREG/TFCP2L1/LTF/NRCAM/FAT4/ALDH1A2/TGFB2/DCHS1/CCL19/DEFB1/IGF1	22
BP	GO:0043277	apoptotic cell clearance	8/854	46/18670	0.00103118	0.0131996	0.0101621	CCL2/THBS1/XKR9/SCARB1/MFGE8/LRP1/TGM2/TREX1	8
BP	GO:0042476	odontogenesis	15/854	132/18670	0.00104382	0.0132311	0.0101863	SERPINE1/COL1A1/INHBA/COL1A2/PERP/PHEX/SHH/GLI2/SMPD3/TNFRSF11B/TGFB3/SDC1/CA2/TGFB2/FGF10	15
BP	GO:0045995	regulation of embryonic development	15/854	132/18670	0.00104382	0.0132311	0.0101863	PHLDA2/SHH/NRK/PTK7/PHLDB1/APOA1/COL5A1/SFRP2/SOX17/IL1RN/COL5A2/FOXA2/LAMA4/IGF1/TBX18	15
BP	GO:0055007	cardiac muscle cell differentiation	15/854	132/18670	0.00104382	0.0132311	0.0101863	G6PD/MYLK3/RGS4/VEGFA/AGT/LMNA/GREM1/ALPK2/TTN/CXADR/PDGFRB/EFNB2/MYH10/NOX4/IGF1	15
BP	GO:0072329	monocarboxylic acid catabolic process	15/854	132/18670	0.00104382	0.0132311	0.0101863	ABHD3/PGD/SORD/PHYH/PLIN5/ALDH3A2/GLYATL2/ABCD3/ABHD2/CYP4F12/CYP4F3/PCK2/PON3/AGXT2/SLC27A2	15
BP	GO:0030278	regulation of ossification	20/854	203/18670	0.00105685	0.0133636	0.0102884	CCN1/NELL1/COMP/ECM1/ESRRA/EGR2/GREM1/TMEM119/CTHRC1/ADGRV1/MGP/SFRP2/JUND/LTF/TGFB3/TGFB2/JAG1/HGF/PDLIM7/IGF1	20
BP	GO:0046661	male sex differentiation	17/854	160/18670	0.00107086	0.0134264	0.0103367	MGST1/INHBA/AKR1C3/SHH/LHFPL2/ICAM1/SFRP2/ADGRG1/SDC1/FSTL3/PDGFRB/ROR2/TGFB2/LRP2/SYCP2/TCF21/FGF10	17
BP	GO:0035249	synaptic transmission, glutamatergic	12/854	93/18670	0.00107136	0.0134264	0.0103367	HTR2A/HTR1B/PTGS2/SERPINE2/CCL2/CDH2/HOMER1/DGKI/GRIK4/GRM7/UNC13C/ROR2	12
BP	GO:0051952	regulation of amine transport	12/854	93/18670	0.00107136	0.0134264	0.0103367	CCK/HTR2A/SLC38A3/HTR1B/RAB3B/RGS4/AGT/GRM7/SYT8/ADRA2A/ACE2/SYT13	12
BP	GO:0048738	cardiac muscle tissue development	22/854	233/18670	0.00107215	0.0134264	0.0103367	RBP4/G6PD/MYLK3/RGS4/VEGFA/AGT/LMNA/GREM1/ALPK2/TTN/PPP1R13L/CXADR/DLL4/ALDH1A2/PDGFRB/EFNB2/TGFB2/LRP2/SMAD7/MYH10/NOX4/IGF1	22
BP	GO:0006681	galactosylceramide metabolic process	4/854	11/18670	0.00110808	0.0136462	0.0105059	GAL3ST1/UGT8/FA2H/B3GALT2	4
BP	GO:0006857	oligopeptide transport	4/854	11/18670	0.00110808	0.0136462	0.0105059	SLC7A11/SLC15A1/SLC9A3R1/CA2	4
BP	GO:0016264	gap junction assembly	4/854	11/18670	0.00110808	0.0136462	0.0105059	CAV1/AGT/GJB2/ACE2	4
BP	GO:0033089	positive regulation of T cell differentiation in thymus	4/854	11/18670	0.00110808	0.0136462	0.0105059	SHH/EGR3/GLI2/VNN1	4
BP	GO:0048672	positive regulation of collateral sprouting	4/854	11/18670	0.00110808	0.0136462	0.0105059	LPAR3/BDNF/CRABP2/LRP1	4
BP	GO:0051791	medium-chain fatty acid metabolic process	4/854	11/18670	0.00110808	0.0136462	0.0105059	ABHD3/GLYATL2/ABHD2/CES1	4
BP	GO:0071372	cellular response to follicle-stimulating hormone stimulus	4/854	11/18670	0.00110808	0.0136462	0.0105059	GCLM/INHBA/GCLC/PPARGC1A	4
BP	GO:1902905	positive regulation of supramolecular fiber organization	20/854	204/18670	0.00112275	0.0137739	0.0106042	CCN2/MYLK3/APOA1/ICAM1/IQGAP2/TGFB3/KIRREL1/EPHA1/CDC42EP3/STMN2/F2RL1/NAV3/CFL2/MAP1B/SWAP70/BIN1/NOX4/HSPA1B/TRPV4/HSPA1A	20
BP	GO:0045926	negative regulation of growth	23/854	249/18670	0.00112375	0.0137739	0.0106042	RBP4/G6PD/OSGIN1/SERPINE2/INHBA/RGS4/AGT/STC2/CRYAB/ALOX15B/SPP1/SCGB3A1/FRZB/SEMA5B/SFRP2/SOX17/HYAL1/TGFB2/WWC2/CDHR2/SEMA6C/HSPA1B/HSPA1A	23
BP	GO:0071333	cellular response to glucose stimulus	15/854	133/18670	0.00112798	0.0137932	0.0106191	GHRHR/GCLM/CPB2/GJB6/LGALS1/ENDOG/ICAM1/PCK2/ADRA2A/GCLC/SERPINF1/FOXA2/PPARGC1A/LRP1/NOX4	15
BP	GO:1902652	secondary alcohol metabolic process	17/854	161/18670	0.00114758	0.014	0.0107782	G6PD/IDH1/SULT2B1/TM7SF2/APOB/NR0B2/CES1/ACO2/CYP51A1/PON1/APOA1/SCARB1/HMGCS2/LEPR/ELOVL6/NPC1L1/MSMO1	17
BP	GO:0010714	positive regulation of collagen metabolic process	6/854	27/18670	0.00116605	0.0141257	0.0108751	CCN2/F2R/F2/TGFB3/PDGFRB/VIM	6
BP	GO:0048668	collateral sprouting	6/854	27/18670	0.00116605	0.0141257	0.0108751	LPAR3/SPP1/BDNF/CRABP2/COBL/LRP1	6
BP	GO:0048799	animal organ maturation	6/854	27/18670	0.00116605	0.0141257	0.0108751	GREM1/LTF/FAT4/ALDH1A2/DCHS1/IGF1	6
BP	GO:0060993	kidney morphogenesis	12/854	94/18670	0.00117814	0.0142391	0.0109624	WWTR1/BASP1/SHH/VEGFA/EYA1/AGT/GCNT3/FAT4/PDGFRB/DCHS1/TCF21/FGF10	12
BP	GO:0030100	regulation of endocytosis	20/854	205/18670	0.00119213	0.0143747	0.0110668	SERPINE1/CAV1/SELE/EGF/EPHA3/VEGFA/GREM1/SFRP4/TFR2/VTN/PLCG2/CDH13/EFNB2/F2RL1/MCTP1/CCL19/RAB31/LRP1/BIN1/HIP1	20
BP	GO:0044409	entry into host	15/854	134/18670	0.00121778	0.0146499	0.0112787	HTR2A/CAV1/LGALS1/ICAM1/VAMP8/SCARB1/CXCR4/F11R/ITGA5/CXADR/EFNB2/HYAL1/ACE2/HSPA1B/HSPA1A	15
BP	GO:0003333	amino acid transmembrane transport	11/854	82/18670	0.00123759	0.0148539	0.0114357	SLC38A3/SLC38A5/RGS4/SLC6A19/AGT/SLC7A11/SLC43A1/SLC1A1/SLC6A9/SLC3A1/SLC36A2	11
BP	GO:0051966	regulation of synaptic transmission, glutamatergic	10/854	70/18670	0.00125112	0.0149818	0.0115341	HTR2A/HTR1B/PTGS2/SERPINE2/CCL2/CDH2/HOMER1/DGKI/GRM7/ROR2	10
BP	GO:0030212	hyaluronan metabolic process	7/854	37/18670	0.00126417	0.0150341	0.0115744	ITIH1/CHP1/EGF/CD44/SMPD3/HYAL1/HGF	7
BP	GO:0033280	response to vitamin D	7/854	37/18670	0.00126417	0.0150341	0.0115744	PTGS2/PHEX/STC2/SPP1/STC1/CXCL10/PENK	7
BP	GO:1905314	semi-lunar valve development	7/854	37/18670	0.00126417	0.0150341	0.0115744	NFATC1/DLL4/HEYL/ROBO2/ROBO1/TGFB2/JAG1	7
BP	GO:0061326	renal tubule development	12/854	95/18670	0.00129359	0.0153488	0.0118167	LGR5/WWTR1/SHH/VEGFA/EYA1/AGT/FAT4/HEYL/COL4A1/JAG1/DCHS1/TCF21	12
BP	GO:0071331	cellular response to hexose stimulus	15/854	135/18670	0.00131351	0.0154792	0.0119171	GHRHR/GCLM/CPB2/GJB6/LGALS1/ENDOG/ICAM1/PCK2/ADRA2A/GCLC/SERPINF1/FOXA2/PPARGC1A/LRP1/NOX4	15
BP	GO:1903825	organic acid transmembrane transport	15/854	135/18670	0.00131351	0.0154792	0.0119171	SLC38A3/SLC38A5/THBS1/RGS4/ABCD3/SLC6A19/AGT/SLC13A1/SLC7A11/SLC43A1/SLC1A1/SLC6A9/LRP2/SLC3A1/SLC36A2	15
BP	GO:1905039	carboxylic acid transmembrane transport	15/854	135/18670	0.00131351	0.0154792	0.0119171	SLC38A3/SLC38A5/THBS1/RGS4/ABCD3/SLC6A19/AGT/SLC13A1/SLC7A11/SLC43A1/SLC1A1/SLC6A9/LRP2/SLC3A1/SLC36A2	15
BP	GO:0120178	steroid hormone biosynthetic process	9/854	59/18670	0.00135113	0.0158506	0.012203	CYP17A1/AKR1C3/AKR1B15/SCARB1/HSD11B2/PPARGC1A/EGR1/HSD11B1/DKK3	9
BP	GO:2000351	regulation of endothelial cell apoptotic process	9/854	59/18670	0.00135113	0.0158506	0.012203	FGG/FGA/SERPINE1/CCL2/ANGPTL4/THBS1/AKR1C3/ICAM1/SCG2	9
BP	GO:0046850	regulation of bone remodeling	8/854	48/18670	0.00137594	0.0160815	0.0123808	PPARGC1B/GREM1/SPP1/TMEM119/TNFRSF11B/LEPR/CA2/PDK4	8
BP	GO:1903409	reactive oxygen species biosynthetic process	14/854	122/18670	0.001377	0.0160815	0.0123808	CYP1A1/PTGS2/CAV1/ASS1/NQO1/DUOXA2/AGT/DUOX2/ICAM1/SPR/AGXT2/SLC30A10/GCHFR/NOX4	14
BP	GO:0021700	developmental maturation	25/854	284/18670	0.00138708	0.0161628	0.0124434	FGG/GHRHR/G6PD/ANG/SPINK1/SLC26A3/ABHD2/VEGFA/GREM1/MMP2/CDH3/EREG/TFCP2L1/LTF/NRCAM/UNC13C/FAT4/ALDH1A2/TGFB2/DCHS1/CCL19/MAP1B/DEFB1/PALM/IGF1	25
BP	GO:0051057	positive regulation of small GTPase mediated signal transduction	10/854	71/18670	0.00139772	0.0162505	0.0125109	COL3A1/F2R/DGKI/APOA1/ADGRG1/PDGFRB/ROBO1/F2RL1/FGF10/IGF1	10
BP	GO:0071326	cellular response to monosaccharide stimulus	15/854	136/18670	0.00141549	0.0163027	0.0125511	GHRHR/GCLM/CPB2/GJB6/LGALS1/ENDOG/ICAM1/PCK2/ADRA2A/GCLC/SERPINF1/FOXA2/PPARGC1A/LRP1/NOX4	15
BP	GO:0048754	branching morphogenesis of an epithelial tube	16/854	150/18670	0.00142301	0.0163027	0.0125511	EGF/SHH/VEGFA/EYA1/AGT/GLI2/CTSH/SFRP2/ESRP2/DLL4/FAT4/COL4A1/HHIP/DCHS1/TCF21/FGF10	16
BP	GO:0045137	development of primary sexual characteristics	21/854	223/18670	0.00142363	0.0163027	0.0125511	ZP3/ANG/MGST1/IDH1/DMRTA1/INHBA/AKR1C3/BASP1/VEGFA/EREG/LHFPL2/ICAM1/SFRP2/ADGRG1/SDC1/FSTL3/PDGFRB/ROBO2/TGFB2/LRP2/TCF21	21
BP	GO:0003180	aortic valve morphogenesis	6/854	28/18670	0.00142731	0.0163027	0.0125511	NFATC1/DLL4/HEYL/ROBO2/ROBO1/JAG1	6
BP	GO:0007205	protein kinase C-activating G protein-coupled receptor signaling pathway	6/854	28/18670	0.00142731	0.0163027	0.0125511	CCK/HTR1B/F2R/GAP43/DGKI/LRP1	6
BP	GO:0033688	regulation of osteoblast proliferation	6/854	28/18670	0.00142731	0.0163027	0.0125511	CCN1/NELL1/GREM1/TMEM119/CTHRC1/LTF	6
BP	GO:0034698	response to gonadotropin	6/854	28/18670	0.00142731	0.0163027	0.0125511	GCLM/INHBA/ICAM1/GJB2/GCLC/PPARGC1A	6
BP	GO:1990776	response to angiotensin	6/854	28/18670	0.00142731	0.0163027	0.0125511	PTGS2/CAV1/AGT/CDC6/CA2/SLC30A10	6
BP	GO:0007340	acrosome reaction	7/854	38/18670	0.00148936	0.0169369	0.0130394	ZP3/SPINK1/ABHD2/SYT8/RIMS1/GLRB/PRND	7
BP	GO:0032350	regulation of hormone metabolic process	7/854	38/18670	0.00148936	0.0169369	0.0130394	AKR1C3/DUOXA2/STC2/HPN/PPARGC1A/EGR1/DKK3	7
BP	GO:0030595	leukocyte chemotaxis	21/854	224/18670	0.00150517	0.0170794	0.013149	CCL15/SERPINE1/CCL2/THBS1/VEGFA/GREM1/CXCL10/SCG2/CXCR4/IL1RN/ANXA1/CXADR/DUSP1/NBL1/TGFB2/F2RL1/CCL19/THBS4/CXCL1/SWAP70/TRPV4	21
BP	GO:0045445	myoblast differentiation	11/854	84/18670	0.00151153	0.0171142	0.0131758	SHH/KLHL41/GREM1/LGALS1/CXCL10/PRICKLE1/SDC1/ZFP36L1/BOC/JAG1/IGF1	11
BP	GO:0001657	ureteric bud development	12/854	97/18670	0.00155264	0.0175414	0.0135047	CRLF1/BASP1/SHH/VEGFA/EYA1/AGT/SDC1/FAT4/ROBO2/DCHS1/SMAD7/TCF21	12
BP	GO:0010712	regulation of collagen metabolic process	8/854	49/18670	0.00157962	0.017769	0.0136799	FAP/CCN2/F2R/GOT1/F2/TGFB3/PDGFRB/VIM	8
BP	GO:0071825	protein-lipid complex subunit organization	8/854	49/18670	0.00157962	0.017769	0.0136799	ALB/APOB/AGT/APOA1/PLA2G2A/SCARB1/LIPG/BIN1	8
BP	GO:0097529	myeloid leukocyte migration	20/854	210/18670	0.00159666	0.0178514	0.0137434	CCL15/SERPINE1/CCL2/THBS1/VEGFA/GREM1/CXCL10/SCG2/IL1RN/ANXA1/CXADR/DUSP1/ROR2/NBL1/TGFB2/CCL19/THBS4/CXCL1/SWAP70/TRPV4	20
BP	GO:0015816	glycine transport	4/854	12/18670	0.00160223	0.0178514	0.0137434	SLC38A5/RGS4/SLC6A9/SLC36A2	4
BP	GO:0019374	galactolipid metabolic process	4/854	12/18670	0.00160223	0.0178514	0.0137434	GAL3ST1/UGT8/FA2H/B3GALT2	4
BP	GO:0070493	thrombin-activated receptor signaling pathway	4/854	12/18670	0.00160223	0.0178514	0.0137434	F2R/IQGAP2/HPGD/F2RL1	4
BP	GO:0032102	negative regulation of response to external stimulus	32/854	400/18670	0.00160412	0.0178514	0.0137434	CCK/FAP/FGG/FFAR4/FGA/SERPINE1/SERPINE2/CCL2/THBS1/PLG/SOCS3/CPB2/GREM1/SPP1/APOH/APOA1/VTN/F2/CD109/SEMA5B/LTF/SERPINF1/C1QTNF1/DUSP1/ROBO2/NBL1/ROBO1/HGF/SEMA6C/TSPAN8/IGF1/TREX1	32
BP	GO:0019218	regulation of steroid metabolic process	14/854	124/18670	0.00161076	0.017887	0.0137708	UGT1A8/UGT1A1/TM7SF2/APOB/FGF19/AKR1C3/AGT/CYP51A1/APOA1/IGFBP7/ELOVL6/PPARGC1A/EGR1/DKK3	14
BP	GO:0001678	cellular glucose homeostasis	16/854	152/18670	0.00163487	0.0181161	0.0139471	GHRHR/GCLM/NGFR/CPB2/GJB6/LGALS1/ENDOG/ICAM1/PCK2/ADRA2A/GCLC/SERPINF1/FOXA2/PPARGC1A/LRP1/NOX4	16
BP	GO:0002793	positive regulation of peptide secretion	25/854	288/18670	0.00168269	0.0186063	0.0143245	RBP4/LGALS9C/FGG/GHRHR/ANG/FGA/GPI/F2R/TSLP/LGALS9B/NR0B2/ALOX15B/TFR2/TTN/TGFB3/TGFB2/F2RL1/NLRP1/CCL19/MYH10/LRP1/ILDR1/TRPV4/IGF1/GRP	25
BP	GO:0060326	cell chemotaxis	26/854	304/18670	0.00169551	0.01861	0.0143274	CCL15/CCRL2/SERPINE1/CCL2/THBS1/VEGFA/EGR3/NR4A1/GREM1/CXCL10/SCG2/CXCR4/IL1RN/ANXA1/CXADR/DUSP1/PDGFRB/NBL1/TGFB2/F2RL1/HGF/CCL19/THBS4/CXCL1/SWAP70/TRPV4	26
BP	GO:0042472	inner ear morphogenesis	12/854	98/18670	0.00169735	0.01861	0.0143274	ATP6V1B1/EYA1/PTK7/HPN/GLI2/CTHRC1/FRZB/NR4A3/SLC9A3R1/ROR2/ZEB1/FGF10	12
BP	GO:0072163	mesonephric epithelium development	12/854	98/18670	0.00169735	0.01861	0.0143274	CRLF1/BASP1/SHH/VEGFA/EYA1/AGT/SDC1/FAT4/ROBO2/DCHS1/SMAD7/TCF21	12
BP	GO:0072164	mesonephric tubule development	12/854	98/18670	0.00169735	0.01861	0.0143274	CRLF1/BASP1/SHH/VEGFA/EYA1/AGT/SDC1/FAT4/ROBO2/DCHS1/SMAD7/TCF21	12
BP	GO:0003170	heart valve development	9/854	61/18670	0.00171917	0.0186837	0.0143842	CCN1/NFATC1/DLL4/HEYL/ROBO2/ROBO1/TGFB2/JAG1/DCHS1	9
BP	GO:0016266	O-glycan processing	9/854	61/18670	0.00171917	0.0186837	0.0143842	GALNT3/GCNT3/GALNT12/MUC13/MUC20/GALNT4/CHST4/B3GNT3/GXYLT2	9
BP	GO:0016137	glycoside metabolic process	5/854	20/18670	0.00172755	0.0186837	0.0143842	AKR1C2/AKR1C1/AKR1B10/AKR1C3/AKR1C4	5
BP	GO:0043931	ossification involved in bone maturation	5/854	20/18670	0.00172755	0.0186837	0.0143842	GREM1/LTF/FAT4/DCHS1/IGF1	5
BP	GO:0048670	regulation of collateral sprouting	5/854	20/18670	0.00172755	0.0186837	0.0143842	LPAR3/SPP1/BDNF/CRABP2/LRP1	5
BP	GO:0008299	isoprenoid biosynthetic process	6/854	29/18670	0.00173091	0.0186837	0.0143842	CYP1A1/AKR1C3/BCO1/CRABP2/HMGCS2/ALDH1A2	6
BP	GO:0050974	detection of mechanical stimulus involved in sensory perception	6/854	29/18670	0.00173091	0.0186837	0.0143842	HTR2A/SERPINE2/HPN/ADGRV1/CXCR4/PIEZO2	6
BP	GO:0043627	response to estrogen	10/854	73/18670	0.00173284	0.0186837	0.0143842	GHRHR/CAV1/ABCC2/APOA1/TNFRSF11B/TGFB3/ARID5A/PDGFRB/CA2/IGFBP2	10
BP	GO:0009100	glycoprotein metabolic process	33/854	419/18670	0.00176471	0.018984	0.0146154	VCAN/EXTL1/CHP1/BGN/B4GALNT2/B3GNT9/CANT1/ST3GAL5/GALNT3/FUT9/GAL3ST1/CHST12/GCNT3/GALNT12/ENTPD5/CHST8/MUC13/NDST4/MUC20/HYAL1/GALNT4/CHST4/ST6GALNAC5/CCL19/B3GNT3/GXYLT2/B3GALT2/ASGR2/SULF2/IGF1/B3GALT5/TREX1/MGAT3	33
BP	GO:0043405	regulation of MAP kinase activity	28/854	337/18670	0.00176799	0.018984	0.0146154	HTR2A/CAV1/EGF/LPAR3/THBS1/F2R/RGS4/TPD52L1/VEGFA/NRK/SPRED3/SFRP2/CXCR4/ADRA2A/TGFB3/MUC20/DUSP1/PDGFRB/ROR2/ROBO1/TGFA/HGF/PAK3/CCL19/NOX4/FGF10/PEA15/IGF1	28
BP	GO:0009749	response to glucose	19/854	197/18670	0.0017854	0.0191314	0.0147289	GHRHR/GCLM/CCN2/THBS1/NR0B2/CPB2/GJB6/LGALS1/ENDOG/ICAM1/PCK2/ADRA2A/GCLC/SERPINF1/FOXA2/PPARGC1A/EGR1/LRP1/NOX4	19
BP	GO:0043406	positive regulation of MAP kinase activity	23/854	258/18670	0.00179497	0.0191943	0.0147773	HTR2A/EGF/LPAR3/THBS1/F2R/TPD52L1/VEGFA/NRK/CXCR4/ADRA2A/TGFB3/MUC20/PDGFRB/ROR2/ROBO1/TGFA/HGF/PAK3/CCL19/NOX4/FGF10/PEA15/IGF1	23
BP	GO:0060976	coronary vasculature development	8/854	50/18670	0.00180645	0.0192775	0.0148413	APLNR/VEGFA/PTK7/PRICKLE1/LTBP1/PDGFRB/LRP2/MYH10	8
BP	GO:0015918	sterol transport	13/854	112/18670	0.00181546	0.0192944	0.0148543	AKR1C1/CAV1/EGF/APOB/SHH/CES1/PON1/APOA1/SCARB1/LIPG/STARD5/NPC1L1/LRP1	13
BP	GO:1903510	mucopolysaccharide metabolic process	13/854	112/18670	0.00181546	0.0192944	0.0148543	ITIH1/VCAN/CHP1/EGF/BGN/LUM/CD44/CHST12/SMPD3/NDST4/HYAL1/HGF/B3GNT3	13
BP	GO:0051302	regulation of cell division	17/854	168/18670	0.00182658	0.0193597	0.0149046	DCDC1/FGF5/ZNF16/SHH/VEGFA/EREG/FGF7/CDC6/SFRP2/SOX17/SSTR5/TGFB3/LBH/CHMP4C/TGFB2/TGFA/THBS4	17
BP	GO:0043542	endothelial cell migration	24/854	274/18670	0.00182906	0.0193597	0.0149046	FAP/PTGS2/GPI/THBS1/VEGFA/AGT/EGR3/NR4A1/GREM1/APOH/STC1/APOA1/SPARC/CDH13/SCG2/SCARB1/PRSS3/ADGRA2/JCAD/ANXA1/SERPINF1/DLL4/EFNB2/ROBO1	24
BP	GO:0070542	response to fatty acid	11/854	86/18670	0.0018332	0.0193641	0.014908	AKR1C2/CCN2/PTGS2/GLDC/ASS1/APOB/AKR1C3/PON1/PPARGC1A/PDK4/CCL19	11
BP	GO:0043648	dicarboxylic acid metabolic process	12/854	99/18670	0.00185297	0.0195333	0.0150382	TAT/GCLM/ME1/IDH1/PHYH/ASS1/GOT1/SLC7A11/GGT1/GCLC/ADSS1/ACMSD	12
BP	GO:0050770	regulation of axonogenesis	18/854	183/18670	0.00187251	0.0196993	0.0151661	NGFR/LPAR3/THY1/CDH2/VEGFA/EPHB3/FN1/SPP1/BDNF/SEMA5B/CRABP2/NRCAM/ROBO2/ROBO1/PAK3/MAP1B/LRP1/SEMA6C	18
BP	GO:0090101	negative regulation of transmembrane receptor protein serine/threonine kinase signaling pathway	14/854	126/18670	0.00187666	0.019703	0.0151689	PEG10/CAV1/GREM1/CD109/SFRP2/TGFB3/LTBP1/FSTL3/NBL1/LRP2/SMAD7/RASL11B/HTRA3/HSPA1A	14
BP	GO:0003007	heart morphogenesis	23/854	259/18670	0.00188726	0.0197743	0.0152238	RBP4/CCN1/SHH/VEGFA/EYA1/COL5A1/ALPK2/TTN/SFRP2/SOX17/PPP1R13L/DLL4/FAT4/HEYL/ALDH1A2/ROBO2/ROBO1/TGFB2/LRP2/JAG1/DCHS1/SMAD7/TREX1	23
BP	GO:0009064	glutamine family amino acid metabolic process	10/854	74/18670	0.00192322	0.0201106	0.0154827	TAT/GCLM/GLYATL1/ASS1/GOT1/SLC7A11/GGT1/GCLC/ADSS1/ASL	10
BP	GO:0060538	skeletal muscle organ development	17/854	169/18670	0.00194673	0.0203155	0.0156405	CNTFR/MEF2D/CAV1/ASS1/BASP1/SHH/KLHL41/MSC/HOMER1/EGR2/SOX17/HEYL/ATF3/EGR1/CFL2/MYORG/TCF21	17
BP	GO:0031032	actomyosin structure organization	19/854	199/18670	0.00200534	0.0208853	0.0160791	CCN2/FHDC1/MYLK3/KLHL41/APOA1/FRMD6/CNN2/TTN/TGFB3/EPHA1/F11R/EPB41L4B/PDGFRB/LDB3/CFL2/CSRP1/MYH10/NOX4/CDC42BPG	19
BP	GO:0015837	amine transport	12/854	100/18670	0.00202011	0.020997	0.0161651	CCK/HTR2A/SLC38A3/HTR1B/RAB3B/RGS4/AGT/GRM7/SYT8/ADRA2A/ACE2/SYT13	12
BP	GO:0001837	epithelial to mesenchymal transition	15/854	141/18670	0.00203036	0.0210239	0.0161858	WWTR1/COL1A1/EPHA3/GREM1/HPN/PHLDB1/SFRP2/FAM83D/TGFB3/FOXA2/HEYL/TGFB2/JAG1/HGF/SMAD7	15
BP	GO:2001233	regulation of apoptotic signaling pathway	32/854	406/18670	0.00203107	0.0210239	0.0161858	FGG/GCLM/ITPRIP/PTGS2/FGA/SERPINE1/CAV1/INHBA/THBS1/BMF/TPD52L1/EYA1/AGT/LMNA/CD44/ICAM1/BDNF/CTSH/SFRP2/SCG2/GCLC/SLC9A3R1/DEPTOR/ATF3/VNN1/HGF/MEIS3/HSPA1B/HSPA1A/FGF10/PEA15/IGF1	32
BP	GO:0046879	hormone secretion	26/854	308/18670	0.00203483	0.0210239	0.0161858	RBP4/FGG/FFAR4/GHRHR/FGA/INHBA/KCNS3/CACNA1C/AGT/NR0B2/SPP1/TFR2/SMPD3/VAMP8/FAM3B/ADRA2A/IL1RN/SSTR5/ANXA1/C1QTNF1/FOXA2/LRP1/PCLO/ILDR1/TRPV4/GRP	26
BP	GO:0006022	aminoglycan metabolic process	17/854	170/18670	0.00207344	0.0213803	0.0164602	ITIH1/VCAN/EXTL1/CHP1/EGF/BGN/B3GNT9/LUM/CD44/CHST12/SMPD3/NDST4/SDC1/PDGFRB/HYAL1/HGF/B3GNT3	17
BP	GO:0071549	cellular response to dexamethasone stimulus	6/854	30/18670	0.00208107	0.0214164	0.016488	ABCC2/ASS1/ICAM1/PCK2/GJB2/SERPINF1	6
BP	GO:0007369	gastrulation	18/854	185/18670	0.00211225	0.0216944	0.016702	INHBA/APLNR/EYA1/MMP2/FN1/PHLDB1/APOA1/VTN/COL5A1/NR4A3/SFRP2/SOX17/IL1RN/COL5A2/ITGA5/FOXA2/COL8A1/COL4A2	18
BP	GO:0001960	negative regulation of cytokine-mediated signaling pathway	10/854	75/18670	0.00213013	0.0217509	0.0167455	H2BC11/CAV1/ECM1/APOA1/PXDN/IL1RN/ROBO1/F2RL1/PALM3/TREX1	10
BP	GO:0006695	cholesterol biosynthetic process	10/854	75/18670	0.00213013	0.0217509	0.0167455	G6PD/TM7SF2/APOB/CES1/CYP51A1/APOA1/HMGCS2/ELOVL6/NPC1L1/MSMO1	10
BP	GO:0002688	regulation of leukocyte chemotaxis	13/854	114/18670	0.00213031	0.0217509	0.0167455	SERPINE1/CCL2/THBS1/VEGFA/GREM1/CXCL10/DUSP1/NBL1/F2RL1/CCL19/THBS4/SWAP70/TRPV4	13
BP	GO:0031532	actin cytoskeleton reorganization	12/854	101/18670	0.00219939	0.0223684	0.0172209	THSD7B/NRK/PDLIM4/PTK7/FGF7/F11R/ANXA1/CXADR/ANTXR1/TRPV4/CDC42BPG/FGF10	12
BP	GO:1901890	positive regulation of cell junction assembly	12/854	101/18670	0.00219939	0.0223684	0.0172209	LRTM1/CAV1/THY1/VEGFA/AGT/LINGO2/EPHB3/BDNF/THBS2/COL16A1/LRRN1/ACE2	12
BP	GO:0061097	regulation of protein tyrosine kinase activity	11/854	88/18670	0.00220856	0.0224177	0.0172589	ALKAL2/GPRC5A/CAV1/EGF/THY1/AGT/EREG/BDNF/ADRA2A/TGFA/NOX4	11
BP	GO:0038065	collagen-activated signaling pathway	4/854	13/18670	0.00223109	0.0224274	0.0172664	COL1A1/ITGA11/COL4A1/COL4A2	4
BP	GO:0043568	positive regulation of insulin-like growth factor receptor signaling pathway	4/854	13/18670	0.00223109	0.0224274	0.0172664	GHRHR/CDH3/MYORG/IGF1	4
BP	GO:0045602	negative regulation of endothelial cell differentiation	4/854	13/18670	0.00223109	0.0224274	0.0172664	VEGFA/XDH/JAG1/ZEB1	4
BP	GO:0048875	chemical homeostasis within a tissue	4/854	13/18670	0.00223109	0.0224274	0.0172664	VEGFA/HOMER1/CTSH/RCN3	4
BP	GO:0061430	bone trabecula morphogenesis	4/854	13/18670	0.00223109	0.0224274	0.0172664	COL1A1/PPARGC1B/GREM1/MMP2	4
BP	GO:0097237	cellular response to toxic substance	22/854	247/18670	0.00225651	0.0226391	0.0174294	ALB/MGST1/PTGS2/AKR1B10/GSTA1/UGT1A1/NQO1/SOD3/MGST2/DUOX2/ENDOG/TXN/NR4A3/SMPD3/GPX2/PXDN/RDH12/SRXN1/ANXA1/PPARGC1A/HGF/EGR1	22
BP	GO:0006023	aminoglycan biosynthetic process	13/854	115/18670	0.00230381	0.0230248	0.0177263	VCAN/EXTL1/EGF/BGN/B3GNT9/LUM/CHST12/SMPD3/NDST4/SDC1/PDGFRB/HYAL1/B3GNT3	13
BP	GO:0046660	female sex differentiation	13/854	115/18670	0.00230381	0.0230248	0.0177263	RBP4/ZP3/ANG/IDH1/DMRTA1/INHBA/VEGFA/EREG/LHFPL2/ICAM1/ROBO2/LRP2/FGF10	13
BP	GO:0000302	response to reactive oxygen species	21/854	232/18670	0.00231303	0.0230725	0.017763	COL1A1/DPEP1/AKR1C3/NQO1/SOD3/PPARGC1B/MMP2/CRYAB/ENDOG/TXN/NR4A3/SMPD3/ANXA1/SDC1/DUSP1/PPARGC1A/PDGFRB/HYAL1/HGF/CCL19/TREX1	21
BP	GO:0030500	regulation of bone mineralization	10/854	76/18670	0.00235458	0.0231887	0.0178525	CCN1/NELL1/COMP/ECM1/GREM1/TMEM119/ADGRV1/MGP/LTF/TGFB3	10
BP	GO:1902653	secondary alcohol biosynthetic process	10/854	76/18670	0.00235458	0.0231887	0.0178525	G6PD/TM7SF2/APOB/CES1/CYP51A1/APOA1/HMGCS2/ELOVL6/NPC1L1/MSMO1	10
BP	GO:0008406	gonad development	20/854	217/18670	0.00235484	0.0231887	0.0178525	ZP3/ANG/MGST1/IDH1/DMRTA1/INHBA/AKR1C3/BASP1/VEGFA/EREG/ICAM1/SFRP2/ADGRG1/SDC1/FSTL3/PDGFRB/ROBO2/TGFB2/LRP2/TCF21	20
BP	GO:0000096	sulfur amino acid metabolic process	7/854	41/18670	0.0023559	0.0231887	0.0178525	GCLM/DPEP1/SLC7A11/GGT1/GCLC/TST/NOX4	7
BP	GO:0085029	extracellular matrix assembly	7/854	41/18670	0.0023559	0.0231887	0.0178525	COL1A2/AGT/PHLDB1/SMPD3/PXDN/ANTXR1/TNXB	7
BP	GO:0090279	regulation of calcium ion import	7/854	41/18670	0.0023559	0.0231887	0.0178525	EGF/CCL2/SPINK1/HOMER1/STC1/TRPV3/PDGFRB	7
BP	GO:1903053	regulation of extracellular matrix organization	7/854	41/18670	0.0023559	0.0231887	0.0178525	FAP/AGT/CPB2/PHLDB1/ANTXR1/LRP1/AEBP1	7
BP	GO:0098869	cellular oxidant detoxification	12/854	102/18670	0.00239146	0.0234942	0.0180876	ALB/MGST1/PTGS2/GSTA1/NQO1/SOD3/MGST2/DUOX2/TXN/GPX2/PXDN/SRXN1	12
BP	GO:0050922	negative regulation of chemotaxis	9/854	64/18670	0.0024174	0.0237042	0.0182493	CCL2/THBS1/GREM1/SEMA5B/DUSP1/ROBO2/NBL1/ROBO1/SEMA6C	9
BP	GO:0070482	response to oxygen levels	31/854	394/18670	0.00243016	0.0237445	0.0182804	CCN2/ANG/CYP1A1/PTGS2/CAV1/COL1A1/ANGPTL4/THBS1/ALDH3A1/VEGFA/SOD3/PSMA6/STC2/LMNA/MMP2/CRYAB/STC1/ENDOG/ICAM1/CXCR4/CA9/TGFB3/HSD11B2/AK4/ZFP36L1/PPARGC1A/PDGFRB/TGFB2/EGR1/PENK/NOX4	31
BP	GO:0034612	response to tumor necrosis factor	26/854	312/18670	0.00243065	0.0237445	0.0182804	CCL15/EDARADD/PTGS2/H2BC11/SELE/COL1A1/ABCC2/ASS1/CCL2/APOB/THBS1/PSMA6/ENDOG/APOA1/ICAM1/SMPD3/GGT1/TNFRSF11B/ZFP36L1/PPARGC1A/HYAL1/F2RL1/CCL19/TNFSF18/HSPA1B/HSPA1A	26
BP	GO:0052126	movement in host environment	16/854	158/18670	0.00243536	0.0237459	0.0182814	HTR2A/CAV1/LGALS1/ICAM1/VAMP8/SCARB1/CXCR4/F11R/CHMP4C/ITGA5/CXADR/EFNB2/HYAL1/ACE2/HSPA1B/HSPA1A	16
BP	GO:0043687	post-translational protein modification	29/854	361/18670	0.00244083	0.0237546	0.0182882	CCN1/FGG/TIMP1/ALB/VCAN/FGA/APOB/FOLH1/CDH2/SOCS3/TMEM132A/PSMA6/KLHL41/STC2/FN1/CALU/SPP1/LGALS1/APOA1/SCG2/IGFBP7/MFGE8/MXRA8/LTBP1/FSTL1/FSTL3/SPARCL1/F5/PENK	29
BP	GO:0006691	leukotriene metabolic process	6/854	31/18670	0.00248214	0.0240217	0.0184938	PTGR1/DPEP1/CYP4F12/MGST2/CYP4F3/GGT1	6
BP	GO:0045742	positive regulation of epidermal growth factor receptor signaling pathway	6/854	31/18670	0.00248214	0.0240217	0.0184938	EGF/AGT/EREG/ADRA2A/TGFA/HIP1	6
BP	GO:0051955	regulation of amino acid transport	6/854	31/18670	0.00248214	0.0240217	0.0184938	CCK/SLC38A3/RGS4/AGT/GRM7/ACE2	6
BP	GO:0001654	eye development	29/854	362/18670	0.00254134	0.024549	0.0188997	RBP4/CYP1A1/COL8A2/INHBA/BCAR3/THY1/CACNA1C/SHH/VEGFA/CRYAB/COL5A1/SLC7A11/COL5A2/MFAP2/SLC25A25/PPP1R13L/SERPINF1/DLL4/ALDH1A2/PDGFRB/COL8A1/TGFB2/EFEMP1/COL4A1/JAG1/ZEB1/MYH10/FGF10/VIM	29
BP	GO:0062012	regulation of small molecule metabolic process	33/854	429/18670	0.00257062	0.0247858	0.019082	UGT1A8/HTR2A/PHLDA2/PTGS2/CAV1/EGF/PLIN5/TM7SF2/APOB/FGF19/AKR1C3/GUCA2B/NQO1/PSMA6/CYP51A1/GUCA2A/NR4A3/SMPD3/SLC7A11/ENTPD5/LEPR/ELOVL6/ANXA1/ACMSD/C1QTNF1/FOXA2/AK4/PPARGC1A/EGR1/PDK4/DKK3/IGF1/TREX1	33
BP	GO:0001656	metanephros development	11/854	90/18670	0.00264395	0.0254455	0.0195899	WWTR1/BASP1/SHH/EYA1/CTSH/FAT4/PDGFRB/ROBO2/EGR1/TCF21/FGF10	11
BP	GO:0034764	positive regulation of transmembrane transport	19/854	204/18670	0.00265716	0.0254783	0.0196152	G6PD/CHP1/CCL2/APLNR/FGF19/F2R/THY1/AGT/F2/NR4A3/PLCG2/CXCL10/ABCB1/SLC9A3R1/ANK2/CA2/EHD3/PDZK1/IGF1	19
BP	GO:1901605	alpha-amino acid metabolic process	19/854	204/18670	0.00265716	0.0254783	0.0196152	TAT/GCLM/ERO1B/GLDC/GLYATL1/DPEP1/ASS1/GOT1/BAAT/SLC7A11/GGT1/HGD/GCLC/ADSS1/ACMSD/TST/AGXT2/ASL/NOX4	19
BP	GO:0060047	heart contraction	24/854	282/18670	0.00266871	0.0255419	0.0196642	CCN2/CACNA2D3/CAV1/TMIGD3/RGS4/CACNA1C/AGT/STC1/TTN/KCNK6/CXCR4/SLC1A1/CACNB1/PPP1R13L/CXADR/KCNJ3/ANK2/TGFB2/SMAD7/EHD3/KCNIP3/DMPK/ACE2/BIN1	24
BP	GO:0051153	regulation of striated muscle cell differentiation	13/854	117/18670	0.00268567	0.0256002	0.019709	G6PD/MYLK3/RGS4/SHH/GREM1/TMEM119/SCGB3A1/BDNF/CXCL10/EFNB2/EHD2/DMPK/IGF1	13
BP	GO:0002548	monocyte chemotaxis	9/854	65/18670	0.00269449	0.0256002	0.019709	CCL15/SERPINE1/CCL2/GREM1/CXCL10/ANXA1/DUSP1/NBL1/CCL19	9
BP	GO:0014823	response to activity	9/854	65/18670	0.00269449	0.0256002	0.019709	GCLM/AGT/CXCR4/SLC25A25/GCLC/ADSS1/PPARGC1A/COL4A2/MTFP1	9
BP	GO:0072577	endothelial cell apoptotic process	9/854	65/18670	0.00269449	0.0256002	0.019709	FGG/FGA/SERPINE1/CCL2/ANGPTL4/THBS1/AKR1C3/ICAM1/SCG2	9
BP	GO:0030203	glycosaminoglycan metabolic process	16/854	160/18670	0.0027656	0.0262277	0.0201921	ITIH1/VCAN/EXTL1/CHP1/EGF/BGN/LUM/CD44/CHST12/SMPD3/NDST4/SDC1/PDGFRB/HYAL1/HGF/B3GNT3	16
BP	GO:0045639	positive regulation of myeloid cell differentiation	11/854	91/18670	0.00288624	0.027322	0.0210346	INHBA/ZNF16/PPARGC1B/RUNX1/IL34/ZFP36L1/CA2/ROR2/JAG1/HSPA1B/HSPA1A	11
BP	GO:0042471	ear morphogenesis	13/854	118/18670	0.00289515	0.0273566	0.0210612	ATP6V1B1/EYA1/PTK7/HPN/GJB6/GLI2/CTHRC1/FRZB/NR4A3/SLC9A3R1/ROR2/ZEB1/FGF10	13
BP	GO:0003176	aortic valve development	6/854	32/18670	0.00293859	0.0275665	0.0212228	NFATC1/DLL4/HEYL/ROBO2/ROBO1/JAG1	6
BP	GO:0006739	NADP metabolic process	6/854	32/18670	0.00293859	0.0275665	0.0212228	PGD/G6PD/ME1/IDH1/TKT/FMO1	6
BP	GO:0046685	response to arsenic-containing substance	6/854	32/18670	0.00293859	0.0275665	0.0212228	CYP1A1/ABCC2/TNFRSF11B/GCLC/SERPINF1/ATF3	6
BP	GO:1901661	quinone metabolic process	6/854	32/18670	0.00293859	0.0275665	0.0212228	AKR1C2/AKR1C1/AKR1B10/AKR1C3/AKR1C4/CYP4F11	6
BP	GO:0150063	visual system development	29/854	366/18670	0.00297956	0.0279005	0.0214799	RBP4/CYP1A1/COL8A2/INHBA/BCAR3/THY1/CACNA1C/SHH/VEGFA/CRYAB/COL5A1/SLC7A11/COL5A2/MFAP2/SLC25A25/PPP1R13L/SERPINF1/DLL4/ALDH1A2/PDGFRB/COL8A1/TGFB2/EFEMP1/COL4A1/JAG1/ZEB1/MYH10/FGF10/VIM	29
BP	GO:0017156	calcium-ion regulated exocytosis	9/854	66/18670	0.00299613	0.0280052	0.0215606	ZP3/CHP1/TRIM9/SYT8/RIMS1/ADRA2A/UNC13C/TRPV6/SYT13	9
BP	GO:0035112	genitalia morphogenesis	4/854	14/18670	0.00301136	0.028097	0.0216312	RBP4/ROR2/SYCP2/FGF10	4
BP	GO:0031346	positive regulation of cell projection organization	30/854	383/18670	0.00302191	0.0281449	0.0216681	ALKAL2/NGFR/EPHA3/LPAR3/VEGFA/ZMYND10/AGT/PTK7/FN1/BDNF/CRABP2/DPYSL3/CXCR4/RIMS1/TGFB3/CDC42EP3/SERPINF1/STMN2/ROBO2/ROBO1/F2RL1/HGF/PAK3/NAV3/COBL/CCL19/MAP1B/LRP1/PALM/TENM2	30
BP	GO:0009581	detection of external stimulus	14/854	133/18670	0.00310961	0.0289099	0.0222571	HTR2A/CDS1/SERPINE2/PKD1L1/HPN/REEP6/ADGRV1/SEMA5B/TRPM3/TTN/CXCR4/ANO3/CNGA1/PIEZO2	14
BP	GO:0031279	regulation of cyclase activity	7/854	43/18670	0.00312012	0.0289558	0.0222924	GUCA2B/CACNA1C/GRM7/GUCA2A/ADGRV1/TIMP2/PALM	7
BP	GO:0003151	outflow tract morphogenesis	10/854	79/18670	0.00314385	0.0291241	0.0224219	VEGFA/EYA1/SFRP2/SOX17/HEYL/ROBO2/ROBO1/TGFB2/LRP2/JAG1	10
BP	GO:0044272	sulfur compound biosynthetic process	18/854	192/18670	0.00316389	0.0291417	0.0224355	GCLM/GSTA2/MGST1/VCAN/GSTA1/GGCT/BGN/MGST2/LUM/CHST12/SLC7A11/ELOVL7/GGT1/NDST4/GCLC/ELOVL6/PDK4/B3GNT3	18
BP	GO:1901888	regulation of cell junction assembly	18/854	192/18670	0.00316389	0.0291417	0.0224355	LRTM1/CAV1/EPHA3/THBS1/GAP43/THY1/VEGFA/AGT/LINGO2/EPHB3/RUNX1/BDNF/THBS2/COL16A1/ROBO2/LRRN1/ACE2/LRP1	18
BP	GO:0001959	regulation of cytokine-mediated signaling pathway	17/854	177/18670	0.00316818	0.0291417	0.0224355	H2BC11/CAV1/ECM1/AGPAT2/SOCS3/TSLP/RUNX1/APOA1/PXDN/CXCR4/IL1RN/ROBO1/F2RL1/PALM3/HSPA1B/HSPA1A/TREX1	17
BP	GO:0060491	regulation of cell projection assembly	17/854	177/18670	0.00316818	0.0291417	0.0224355	FAM110C/CAV1/GAP43/ZMYND10/KLHL41/ICAM1/DPYSL3/TGFB3/RAP1GAP/CDC42EP3/SH3YL1/PLD1/F2RL1/COBL/CCL19/PALM/TENM2	17
BP	GO:0043010	camera-type eye development	26/854	319/18670	0.00328157	0.0300782	0.0231565	RBP4/CYP1A1/COL8A2/INHBA/BCAR3/THY1/CACNA1C/SHH/VEGFA/CRYAB/SLC7A11/SLC25A25/PPP1R13L/SERPINF1/DLL4/ALDH1A2/PDGFRB/COL8A1/TGFB2/EFEMP1/COL4A1/JAG1/ZEB1/MYH10/FGF10/VIM	26
BP	GO:0070588	calcium ion transmembrane transport	26/854	319/18670	0.00328157	0.0300782	0.0231565	HTR2A/CACNA2D3/G6PD/APLNR/F2R/THY1/CACNA1C/PKD1L1/F2/PLCG2/CXCL10/TRPM3/ADRA2A/SLC25A25/CACNB1/TRPV3/ANK2/TRPV6/TMEM37/RRAD/EHD3/CCL19/NCS1/NALCN/BIN1/TRPV4	26
BP	GO:0033002	muscle cell proliferation	21/854	239/18670	0.00329501	0.0301482	0.0232104	RBP4/ANG/HTR1B/PTGS2/MEF2D/THBS1/SHH/AGT/MMP2/EREG/NR4A3/SMPD3/CDH13/TGFB3/HPGD/PPARGC1A/PDGFRB/TGFB2/TGM2/IGF1/NOTCH3	21
BP	GO:2001023	regulation of response to drug	12/854	106/18670	0.00330121	0.0301518	0.0232132	HTR2A/HTR1B/RAB3B/RGS4/AGT/ENDOG/TXN/NR4A3/SYT8/HGF/PALM/SYT13	12
BP	GO:0070977	bone maturation	5/854	23/18670	0.00334623	0.0304028	0.0234064	GREM1/LTF/FAT4/DCHS1/IGF1	5
BP	GO:0072215	regulation of metanephros development	5/854	23/18670	0.00334623	0.0304028	0.0234064	WWTR1/BASP1/FAT4/PDGFRB/EGR1	5
BP	GO:0072337	modified amino acid transport	5/854	23/18670	0.00334623	0.0304028	0.0234064	SLC7A11/SLC9A3R1/LRP2/PDZK1/SLC3A1	5
BP	GO:0061098	positive regulation of protein tyrosine kinase activity	8/854	55/18670	0.00335266	0.030408	0.0234104	ALKAL2/EGF/AGT/EREG/BDNF/ADRA2A/TGFA/NOX4	8
BP	GO:0070509	calcium ion import	10/854	80/18670	0.00344928	0.0310646	0.0239159	EGF/CCL2/SPINK1/CACNA1C/HOMER1/STC1/TRPV3/PDGFRB/TRPV6/TRPV4	10
BP	GO:0010837	regulation of keratinocyte proliferation	6/854	33/18670	0.00345494	0.0310646	0.0239159	CDH3/FGF7/CD109/ZFP36L1/EFNB2/FGF10	6
BP	GO:0031112	positive regulation of microtubule polymerization or depolymerization	6/854	33/18670	0.00345494	0.0310646	0.0239159	STMN2/NAV3/MAP1B/HSPA1B/TRPV4/HSPA1A	6
BP	GO:1901186	positive regulation of ERBB signaling pathway	6/854	33/18670	0.00345494	0.0310646	0.0239159	EGF/AGT/EREG/ADRA2A/TGFA/HIP1	6
BP	GO:2000352	negative regulation of endothelial cell apoptotic process	6/854	33/18670	0.00345494	0.0310646	0.0239159	FGG/FGA/SERPINE1/ANGPTL4/ICAM1/SCG2	6
BP	GO:0036293	response to decreased oxygen levels	29/854	370/18670	0.00348053	0.0312406	0.0240514	CCN2/ANG/CYP1A1/PTGS2/CAV1/ANGPTL4/THBS1/ALDH3A1/VEGFA/SOD3/PSMA6/STC2/LMNA/MMP2/CRYAB/STC1/ENDOG/ICAM1/CXCR4/CA9/TGFB3/HSD11B2/AK4/ZFP36L1/PPARGC1A/TGFB2/EGR1/PENK/NOX4	29
BP	GO:0030177	positive regulation of Wnt signaling pathway	17/854	179/18670	0.00355695	0.0317888	0.0244735	LGR5/CAV1/COL1A1/EGF/SHH/PSMA6/PTK7/CDH3/SFRP4/PLEKHA4/SFRP2/HHEX/DEPDC1B/ADGRA2/ROR2/SULF2/FGF10	17
BP	GO:0050921	positive regulation of chemotaxis	14/854	135/18670	0.00356367	0.0317888	0.0244735	SERPINE1/THBS1/VEGFA/CXCL10/CDH13/SCG2/CXCR4/PDGFRB/F2RL1/CCL19/THBS4/SWAP70/TRPV4/FGF10	14
BP	GO:0010463	mesenchymal cell proliferation	7/854	44/18670	0.00356678	0.0317888	0.0244735	SHH/VEGFA/LMNA/FGF7/FAT4/DCHS1/ZEB1	7
BP	GO:0032965	regulation of collagen biosynthetic process	7/854	44/18670	0.00356678	0.0317888	0.0244735	CCN2/F2R/GOT1/F2/TGFB3/PDGFRB/VIM	7
BP	GO:0007160	cell-matrix adhesion	20/854	225/18670	0.00357219	0.0317888	0.0244735	FGG/CCN2/COL3A1/FGA/SERPINE1/EPHA3/THBS1/THY1/VEGFA/FN1/VTN/CD44/CDH13/COL16A1/EPHA1/ITGA11/ITGBL1/JAG1/LRP1/PPFIA2	20
BP	GO:0001704	formation of primary germ layer	13/854	121/18670	0.00360488	0.0320176	0.0246496	INHBA/EYA1/MMP2/FN1/VTN/COL5A1/NR4A3/SFRP2/SOX17/COL5A2/ITGA5/COL8A1/COL4A2	13
BP	GO:0045666	positive regulation of neuron differentiation	29/854	371/18670	0.00361638	0.0320176	0.0246496	BRINP1/ALKAL2/NGFR/EPHA3/LPAR3/VEGFA/AGT/PTK7/FN1/GLI2/BDNF/CRABP2/DPYSL3/CXCR4/RIMS1/TIMP2/NRCAM/SERPINF1/STMN2/HEYL/ROBO2/NBL1/ROBO1/HGF/PAK3/COBL/ZEB1/MAP1B/LRP1	29
BP	GO:0048880	sensory system development	29/854	371/18670	0.00361638	0.0320176	0.0246496	RBP4/CYP1A1/COL8A2/INHBA/BCAR3/THY1/CACNA1C/SHH/VEGFA/CRYAB/COL5A1/SLC7A11/COL5A2/MFAP2/SLC25A25/PPP1R13L/SERPINF1/DLL4/ALDH1A2/PDGFRB/COL8A1/TGFB2/EFEMP1/COL4A1/JAG1/ZEB1/MYH10/FGF10/VIM	29
BP	GO:0008203	cholesterol metabolic process	15/854	150/18670	0.0036932	0.0326421	0.0251304	G6PD/SULT2B1/TM7SF2/APOB/NR0B2/CES1/CYP51A1/PON1/APOA1/SCARB1/HMGCS2/LEPR/ELOVL6/NPC1L1/MSMO1	15
BP	GO:0051495	positive regulation of cytoskeleton organization	20/854	226/18670	0.00375587	0.0329417	0.0253611	CCN2/MYLK3/APOA1/ICAM1/IQGAP2/TGFB3/KIRREL1/EPHA1/CDC42EP3/STMN2/F2RL1/NAV3/CFL2/MAP1B/SWAP70/BIN1/NOX4/HSPA1B/TRPV4/HSPA1A	20
BP	GO:0090183	regulation of kidney development	8/854	56/18670	0.00375804	0.0329417	0.0253611	WWTR1/BASP1/SHH/VEGFA/AGT/FAT4/PDGFRB/EGR1	8
BP	GO:0050769	positive regulation of neurogenesis	35/854	474/18670	0.00376287	0.0329417	0.0253611	BRINP1/ALKAL2/NGFR/SERPINE2/EPHA3/LPAR3/SHH/ZNF365/VEGFA/AGT/PTK7/FN1/GLI2/BDNF/CRABP2/DPYSL3/CXCR4/RIMS1/TIMP2/IL34/NRCAM/SERPINF1/STMN2/HEYL/ROBO2/NBL1/ROBO1/LRP2/HGF/PAK3/COBL/ZEB1/MAP1B/LRP1/BIN1	35
BP	GO:0010565	regulation of cellular ketone metabolic process	17/854	180/18670	0.00376563	0.0329417	0.0253611	UGT1A8/PTGS2/CAV1/PLIN5/FGF19/AKR1C3/NQO1/PSMA6/NR4A3/SLC7A11/ANXA1/ACMSD/PPARGC1A/EGR1/PDK4/DKK3/TREX1	17
BP	GO:0016126	sterol biosynthetic process	10/854	81/18670	0.0037778	0.0329417	0.0253611	G6PD/TM7SF2/APOB/CES1/CYP51A1/APOA1/HMGCS2/ELOVL6/NPC1L1/MSMO1	10
BP	GO:0022617	extracellular matrix disassembly	10/854	81/18670	0.0037778	0.0329417	0.0253611	FAP/TIMP1/PLG/MMP11/MMP2/HPN/CD44/ADAMTS4/TIMP2/LRP1	10
BP	GO:0060761	negative regulation of response to cytokine stimulus	10/854	81/18670	0.0037778	0.0329417	0.0253611	H2BC11/CAV1/ECM1/APOA1/PXDN/IL1RN/ROBO1/F2RL1/PALM3/TREX1	10
BP	GO:0110110	positive regulation of animal organ morphogenesis	10/854	81/18670	0.0037778	0.0329417	0.0253611	BASP1/VEGFA/AGT/HPN/FGF7/ROBO2/ROBO1/TGFB2/JAG1/FGF10	10
BP	GO:0009582	detection of abiotic stimulus	14/854	136/18670	0.00381018	0.0331684	0.0255356	HTR2A/CDS1/SERPINE2/PKD1L1/HPN/REEP6/ADGRV1/SEMA5B/TRPM3/TTN/CXCR4/ANO3/CNGA1/PIEZO2	14
BP	GO:0006486	protein glycosylation	22/854	258/18670	0.00383728	0.0332927	0.0256313	EXTL1/CHP1/B4GALNT2/B3GNT9/ST3GAL5/GALNT3/FUT9/GAL3ST1/GCNT3/GALNT12/ENTPD5/MUC13/MUC20/GALNT4/CHST4/ST6GALNAC5/B3GNT3/GXYLT2/B3GALT2/ASGR2/B3GALT5/MGAT3	22
BP	GO:0043413	macromolecule glycosylation	22/854	258/18670	0.00383728	0.0332927	0.0256313	EXTL1/CHP1/B4GALNT2/B3GNT9/ST3GAL5/GALNT3/FUT9/GAL3ST1/GCNT3/GALNT12/ENTPD5/MUC13/MUC20/GALNT4/CHST4/ST6GALNAC5/B3GNT3/GXYLT2/B3GALT2/ASGR2/B3GALT5/MGAT3	22
BP	GO:0044406	adhesion of symbiont to host	4/854	15/18670	0.00395918	0.0341792	0.0263138	ICAM1/SCARB1/LTF/ACE2	4
BP	GO:0070365	hepatocyte differentiation	4/854	15/18670	0.00395918	0.0341792	0.0263138	CYP1A1/FRZB/PCK2/ANXA1	4
BP	GO:0072075	metanephric mesenchyme development	4/854	15/18670	0.00395918	0.0341792	0.0263138	BASP1/SHH/PDGFRB/TCF21	4
BP	GO:0090257	regulation of muscle system process	22/854	259/18670	0.0040183	0.0345613	0.026608	CCN2/G6PD/PTGS2/CAV1/F2R/RGS4/CACNA1C/LMCD1/AGT/LMNA/STC1/NR4A3/SGCA/ADRA2A/ANK2/PPARGC1A/SMAD7/EHD3/DMPK/ACE2/BIN1/IGF1	22
BP	GO:0006536	glutamate metabolic process	6/854	34/18670	0.00403582	0.0345613	0.026608	TAT/GCLM/GOT1/SLC7A11/GGT1/GCLC	6
BP	GO:0048566	embryonic digestive tract development	6/854	34/18670	0.00403582	0.0345613	0.026608	SHH/GLI2/ALDH1A2/TGFB2/TCF21/FGF10	6
BP	GO:2000273	positive regulation of signaling receptor activity	6/854	34/18670	0.00403582	0.0345613	0.026608	EGF/CCL2/GREM1/EREG/ADRA2A/TGFA	6
BP	GO:0042102	positive regulation of T cell proliferation	11/854	95/18670	0.00404014	0.0345613	0.026608	ZP3/SHH/HHLA2/CD1D/LILRB2/ANXA1/IGFBP2/EFNB1/CCL19/HLA-DMB/IGF1	11
BP	GO:0032570	response to progesterone	7/854	45/18670	0.00406045	0.0345613	0.026608	CAV1/THBS1/ABHD2/GJB2/TGFB3/TGFB2/FOSB	7
BP	GO:0071827	plasma lipoprotein particle organization	7/854	45/18670	0.00406045	0.0345613	0.026608	ALB/APOB/AGT/APOA1/PLA2G2A/SCARB1/LIPG	7
BP	GO:0003272	endocardial cushion formation	5/854	24/18670	0.00406995	0.0345613	0.026608	HEYL/ROBO2/ROBO1/TGFB2/DCHS1	5
BP	GO:0033081	regulation of T cell differentiation in thymus	5/854	24/18670	0.00406995	0.0345613	0.026608	SHH/EGR3/GLI2/VNN1/ZEB1	5
BP	GO:0060343	trabecula formation	5/854	24/18670	0.00406995	0.0345613	0.026608	RBP4/COL1A1/PPARGC1B/GREM1/MMP2	5
BP	GO:0050808	synapse organization	31/854	408/18670	0.00408875	0.0346643	0.0266873	LRTM1/F2R/GAP43/CDH2/ZNF365/LINGO2/HOMER1/EPHB3/SPARC/GABRB3/BDNF/THBS2/SLC7A11/NRCAM/UNC13C/LILRB2/CTNND2/CACNB1/EFNB2/SPARCL1/GLRB/ROBO2/COL4A1/PAK3/LRRN1/ADGRF1/MYH10/MAP1B/PCLO/PPFIA2/PALM	31
BP	GO:1905954	positive regulation of lipid localization	10/854	82/18670	0.00413061	0.0349622	0.0269166	PLIN5/APOB/SPP1/PON1/APOA1/SCARB1/LIPG/LRAT/C1QTNF1/LRP1	10
BP	GO:0071621	granulocyte chemotaxis	13/854	123/18670	0.00415192	0.0350854	0.0270115	CCL15/CCL2/THBS1/CXCL10/SCG2/IL1RN/ANXA1/CXADR/TGFB2/CCL19/THBS4/CXCL1/TRPV4	13
BP	GO:1904062	regulation of cation transmembrane transport	27/854	342/18670	0.00427412	0.0360594	0.0277613	G6PD/CAV1/CHP1/SHISA9/CCL2/APLNR/F2R/THY1/RGS4/CACNA1C/AGT/HOMER1/F2/PLCG2/CXCL10/DPP10/ADRA2A/CACNB1/SLC9A3R1/ANK2/PPARGC1A/RRAD/EHD3/HECW1/PDZK1/KCNIP3/BIN1	27
BP	GO:0001666	response to hypoxia	28/854	359/18670	0.0043286	0.0364598	0.0280696	ANG/CYP1A1/PTGS2/CAV1/ANGPTL4/THBS1/ALDH3A1/VEGFA/SOD3/PSMA6/STC2/LMNA/MMP2/CRYAB/STC1/ENDOG/ICAM1/CXCR4/CA9/TGFB3/HSD11B2/AK4/ZFP36L1/PPARGC1A/TGFB2/EGR1/PENK/NOX4	28
BP	GO:0006835	dicarboxylic acid transport	11/854	96/18670	0.00437944	0.0368284	0.0283534	CCK/ABCC2/SLC26A3/SLC13A1/GRM7/SLC7A11/RIMS1/SLC1A1/LRP2/SLC13A2/PPFIA2	11
BP	GO:0030168	platelet activation	15/854	153/18670	0.00444829	0.0373469	0.0287525	FGG/COL3A1/FGA/COL1A1/SERPINE2/COMP/F2R/COL1A2/DGKI/F2/PLCG2/SLC7A11/ADRA2A/C1QTNF1/CSRP1	15
BP	GO:0006024	glycosaminoglycan biosynthetic process	12/854	110/18670	0.0044721	0.0374762	0.0288521	VCAN/EXTL1/EGF/BGN/LUM/CHST12/SMPD3/NDST4/SDC1/PDGFRB/HYAL1/B3GNT3	12
BP	GO:0010517	regulation of phospholipase activity	9/854	70/18670	0.00447811	0.0374762	0.0288521	CCN1/HTR2A/ANG/SELE/AGT/BDNF/ANXA1/PDGFRB/LRP1	9
BP	GO:0050867	positive regulation of cell activation	30/854	394/18670	0.00454597	0.0379554	0.029221	CCN2/ZP3/CAV1/CCL2/THBS1/THY1/CD83/SHH/TSLP/EGR3/RUNX1/LGALS1/GLI2/HHLA2/NR4A3/VAMP8/CD1D/LILRB2/ANXA1/PDGFRB/EFNB2/F2RL1/VNN1/PAK3/IGFBP2/EFNB1/CCL19/HLA-DMB/FGF10/IGF1	30
BP	GO:0046677	response to antibiotic	26/854	327/18670	0.00454997	0.0379554	0.029221	RBP4/G6PD/CYP1A1/HTR1B/COL1A1/UGT1A1/RGS4/NQO1/CRYAB/ENDOG/TXN/SPARC/ICAM1/NR4A3/SMPD3/GJB2/HPGD/ANXA1/SDC1/DUSP1/PDGFRB/HYAL1/HGF/EGR1/CRIP1/PENK	26
BP	GO:1904018	positive regulation of vasculature development	20/854	230/18670	0.00457103	0.03807	0.0293092	PTGS2/SERPINE1/ANGPTL4/APLNR/THBS1/ECM1/VEGFA/RUNX1/CTSH/SFRP2/CXCR4/EPHA1/JCAD/ANXA1/ITGA5/EFNB2/HYAL1/HGF/EGR1/LRG1	20
BP	GO:0071675	regulation of mononuclear cell migration	7/854	46/18670	0.00460417	0.0382846	0.0294744	SERPINE1/THBS1/GREM1/CXCL10/DUSP1/NBL1/TRPV4	7
BP	GO:0010721	negative regulation of cell development	27/854	344/18670	0.00461984	0.0383535	0.0295275	BRINP1/G6PD/NGFR/COL3A1/THY1/RGS4/SHH/ZNF365/VEGFA/SPP1/LGALS1/F2/FRZB/SEMA5B/DPYSL3/LTF/ADGRG1/STMN2/EFNB2/JAG1/LRP1/SEMA6C/TRPV4/SPOCK1/IGF1/NOTCH3/VIM	27
BP	GO:0001893	maternal placenta development	6/854	35/18670	0.00468586	0.0388396	0.0299017	PTGS2/STC2/SPP1/STC1/GJB2/JUNB	6
BP	GO:0001933	negative regulation of protein phosphorylation	32/854	429/18670	0.00469451	0.0388493	0.0299092	PSCA/KLHL31/GPRC5A/ITPRIP/WWTR1/CAV1/AMBP/CHP1/SPINK1/THY1/RGS4/SOCS3/GREM1/CD109/PTPRT/SPRED3/SFRP2/MARVELD3/HHEX/KIRREL1/XDH/EPHA1/SLC9A3R1/DUSP1/PPARGC1A/PTPRR/DEPTOR/F2RL1/ATF3/HGF/CDKN2B/SMAD7	32
BP	GO:0048017	inositol lipid-mediated signaling	17/854	184/18670	0.00470383	0.0388645	0.0299209	HTR2A/ZP3/SERPINE2/F2R/AGT/F2/PLCG2/ENTPD5/SLC9A3R1/ZFP36L1/PDGFRB/PLD1/TGFB2/F2RL1/HGF/NCS1/IGF1	17
BP	GO:0120162	positive regulation of cold-induced thermogenesis	11/854	97/18670	0.00474101	0.0390738	0.030082	FFAR4/IRF4/DIO2/CAV1/VEGFA/PPARGC1B/CXCR4/MFAP2/LEPR/ELOVL6/PPARGC1A	11
BP	GO:0030307	positive regulation of cell growth	16/854	169/18670	0.00474419	0.0390738	0.030082	LPAR3/VEGFA/FN1/HPN/F2/KRT17/BDNF/CRABP2/SFRP2/CXCR4/RIMS1/HYAL1/TGFB2/MAP1B/LRP1/IGF1	16
BP	GO:1904019	epithelial cell apoptotic process	12/854	111/18670	0.00481137	0.0395644	0.0304597	FGG/FGA/SERPINE1/CCL2/ANGPTL4/THBS1/AKR1C3/SFRP4/ICAM1/SCG2/ZFP36L1/PPARGC1A	12
BP	GO:0003071	renal system process involved in regulation of systemic arterial blood pressure	5/854	25/18670	0.00489886	0.039905	0.0307219	F2R/CYP4F12/AGT/HSD11B2/F2RL1	5
BP	GO:0031069	hair follicle morphogenesis	5/854	25/18670	0.00489886	0.039905	0.0307219	SHH/FGF7/KRT17/TGFB2/FGF10	5
BP	GO:0050927	positive regulation of positive chemotaxis	5/854	25/18670	0.00489886	0.039905	0.0307219	VEGFA/CDH13/SCG2/F2RL1/FGF10	5
BP	GO:0072012	glomerulus vasculature development	5/854	25/18670	0.00489886	0.039905	0.0307219	PDGFRB/EGR1/TCF21/ACTA2/NOTCH3	5
BP	GO:0090025	regulation of monocyte chemotaxis	5/854	25/18670	0.00489886	0.039905	0.0307219	SERPINE1/GREM1/CXCL10/DUSP1/NBL1	5
BP	GO:1904385	cellular response to angiotensin	5/854	25/18670	0.00489886	0.039905	0.0307219	CAV1/AGT/CDC6/CA2/SLC30A10	5
BP	GO:0046889	positive regulation of lipid biosynthetic process	10/854	84/18670	0.00491397	0.0399655	0.0307685	CCN1/HTR2A/ZP3/PTGS2/PLIN5/APOA1/SMPD3/SCARB1/ANXA1/PPARGC1A	10
BP	GO:1904427	positive regulation of calcium ion transmembrane transport	9/854	71/18670	0.00492526	0.0399946	0.030791	G6PD/APLNR/F2R/THY1/F2/PLCG2/CXCL10/ANK2/EHD3	9
BP	GO:0042737	drug catabolic process	14/854	140/18670	0.00493879	0.0400419	0.0308274	TAT/CYP2B6/GLDC/MOXD1/SULT1C4/DUOX2/CTSH/PXDN/PCK2/HGD/CYP2C8/BDH1/CYP2C9/CYP2A6	14
BP	GO:0002791	regulation of peptide secretion	36/854	500/18670	0.00497596	0.0402804	0.031011	RBP4/LGALS9C/FGG/FFAR4/GHRHR/ANG/FGA/GPI/F2R/KCNS3/CACNA1C/TSLP/LGALS9B/NR0B2/FN1/ALOX15B/TFR2/CYP51A1/APOA1/TTN/ADRA2A/SSTR5/TGFB3/ANXA1/FOXA2/TGFB2/F2RL1/NLRP1/CCL19/MYH10/LRP1/ILDR1/TRPV4/IGF1/ANXA4/GRP	36
BP	GO:0034765	regulation of ion transmembrane transport	35/854	483/18670	0.00504492	0.0407467	0.03137	CACNA2D3/G6PD/CAV1/CHP1/SHISA9/CCL2/APLNR/THBS1/F2R/KCNS3/THY1/RGS4/CACNA1C/AGT/HOMER1/F2/PLCG2/CXCL10/DPP10/KCNK6/ADRA2A/ABCB1/CACNB1/SLC9A3R1/KCNJ3/ANK2/PPARGC1A/TMEM37/RRAD/EHD3/HECW1/PDZK1/KCNIP3/NALCN/BIN1	35
BP	GO:0001977	renal system process involved in regulation of blood volume	4/854	16/18670	0.00508998	0.0407467	0.03137	F2R/CYP4F12/HSD11B2/F2RL1	4
BP	GO:0006103	2-oxoglutarate metabolic process	4/854	16/18670	0.00508998	0.0407467	0.03137	TAT/IDH1/PHYH/GOT1	4
BP	GO:0010566	regulation of ketone biosynthetic process	4/854	16/18670	0.00508998	0.0407467	0.03137	AKR1C3/PPARGC1A/EGR1/DKK3	4
BP	GO:0032354	response to follicle-stimulating hormone	4/854	16/18670	0.00508998	0.0407467	0.03137	GCLM/INHBA/GCLC/PPARGC1A	4
BP	GO:0034116	positive regulation of heterotypic cell-cell adhesion	4/854	16/18670	0.00508998	0.0407467	0.03137	FGG/FGA/THY1/CD44	4
BP	GO:0097067	cellular response to thyroid hormone stimulus	4/854	16/18670	0.00508998	0.0407467	0.03137	GCLM/CTSH/GCLC/PPARGC1A	4
BP	GO:0045667	regulation of osteoblast differentiation	13/854	126/18670	0.00509628	0.0407467	0.03137	CCN1/NELL1/ESRRA/GREM1/TMEM119/CTHRC1/SFRP2/JUND/LTF/JAG1/HGF/PDLIM7/IGF1	13
BP	GO:0002042	cell migration involved in sprouting angiogenesis	11/854	98/18670	0.00512584	0.0409201	0.0315035	PTGS2/THBS1/VEGFA/EGR3/NR4A1/GREM1/JCAD/ANXA1/DLL4/EFNB2/ROBO1	11
BP	GO:0003279	cardiac septum development	12/854	112/18670	0.00517088	0.0412164	0.0317315	CCN1/PTK7/LTBP1/ANK2/HEYL/ROBO2/ROBO1/TGFB2/LRP2/JAG1/SMAD7/MYH10	12
BP	GO:0014911	positive regulation of smooth muscle cell migration	7/854	47/18670	0.005201	0.0413297	0.0318188	AGT/VTN/NR4A3/PDGFRB/LRP1/NOX4/IGF1	7
BP	GO:0061383	trabecula morphogenesis	7/854	47/18670	0.005201	0.0413297	0.0318188	RBP4/COL1A1/PPARGC1B/GREM1/MMP2/DLL4/TGFB2	7
BP	GO:0003205	cardiac chamber development	16/854	171/18670	0.00531222	0.0420401	0.0323657	RBP4/CCN1/PTK7/SFRP2/LTBP1/PPP1R13L/DLL4/ANK2/HEYL/ROBO2/ROBO1/TGFB2/LRP2/JAG1/SMAD7/MYH10	16
BP	GO:0010634	positive regulation of epithelial cell migration	16/854	171/18670	0.00531222	0.0420401	0.0323657	PTGS2/GPI/THBS1/VEGFA/AGT/FGF7/SPARC/CTSH/SCARB1/ADGRA2/JCAD/ANXA1/EPB41L4B/HYAL1/TGFB2/FGF10	16
BP	GO:0030856	regulation of epithelial cell differentiation	15/854	156/18670	0.00532447	0.0420401	0.0323657	SERPINE1/WWTR1/CAV1/SULT2B1/VEGFA/ALOX15B/RUNX1/SFRP4/FRZB/CD109/XDH/FAT4/ZFP36L1/JAG1/ZEB1	15
BP	GO:0034767	positive regulation of ion transmembrane transport	15/854	156/18670	0.00532447	0.0420401	0.0323657	G6PD/CHP1/CCL2/APLNR/F2R/THY1/AGT/F2/PLCG2/CXCL10/ABCB1/SLC9A3R1/ANK2/EHD3/PDZK1	15
BP	GO:0019319	hexose biosynthetic process	10/854	85/18670	0.00534703	0.0420401	0.0323657	RBP4/SORD/GPI/GOT1/PCK2/ALDOB/LEPR/PPARGC1A/ATF3/SLC37A4	10
BP	GO:0045682	regulation of epidermis development	10/854	85/18670	0.00534703	0.0420401	0.0323657	SULT2B1/ALOX15B/RUNX1/CDH3/SFRP4/KRT17/CD109/NAB1/ZFP36L1/TGFB2	10
BP	GO:0050772	positive regulation of axonogenesis	10/854	85/18670	0.00534703	0.0420401	0.0323657	NGFR/LPAR3/VEGFA/FN1/BDNF/CRABP2/ROBO2/ROBO1/MAP1B/LRP1	10
BP	GO:0035690	cellular response to drug	32/854	433/18670	0.00537571	0.0422018	0.0324902	HTR2A/GCLM/HTR1B/PTGS2/ABCC2/UGT1A1/DPEP1/ASS1/HTR4/RGS4/NQO1/CASTOR1/ENDOG/TXN/ICAM1/NR4A3/SMPD3/PCK2/CXCR4/GJB2/GCLC/LYPD1/ANXA1/SERPINF1/SLC9A3R1/ADSS1/PPARGC1A/HGF/EGR1/PALM/VIM/TREX1	32
BP	GO:0060193	positive regulation of lipase activity	9/854	72/18670	0.0054063	0.0422772	0.0325483	CCN1/HTR2A/ANG/SELE/PLIN5/AGT/APOH/BDNF/PDGFRB	9
BP	GO:0032733	positive regulation of interleukin-10 production	6/854	36/18670	0.00540973	0.0422772	0.0325483	LGALS9C/IRF4/CD83/TSLP/LGALS9B/HGF	6
BP	GO:0071634	regulation of transforming growth factor beta production	6/854	36/18670	0.00540973	0.0422772	0.0325483	PTGS2/THBS1/CDH3/LUM/LTBP1/TGFB2	6
BP	GO:0042326	negative regulation of phosphorylation	34/854	468/18670	0.00544609	0.0424391	0.0326729	PSCA/KLHL31/GPRC5A/ITPRIP/WWTR1/CAV1/AMBP/CHP1/INHBA/SPINK1/THY1/RGS4/SOCS3/GREM1/CD109/PTPRT/SPRED3/SFRP2/MARVELD3/HHEX/KIRREL1/XDH/EPHA1/SLC9A3R1/FOXA2/DUSP1/PPARGC1A/PTPRR/DEPTOR/F2RL1/ATF3/HGF/CDKN2B/SMAD7	34
BP	GO:0046887	positive regulation of hormone secretion	13/854	127/18670	0.00544678	0.0424391	0.0326729	RBP4/FGG/GHRHR/FGA/INHBA/NR0B2/SPP1/TFR2/VAMP8/C1QTNF1/LRP1/ILDR1/GRP	13
BP	GO:0010001	glial cell differentiation	19/854	218/18670	0.00548405	0.0426656	0.0328473	SERPINE2/FGF5/GAP43/CDH2/SHH/ZNF365/EGR2/VTN/F2/CXCR4/IL34/MXRA8/NAB1/ROR2/FA2H/LRP1/BIN1/FGF10/VIM	19
BP	GO:1901343	negative regulation of vasculature development	17/854	187/18670	0.00552643	0.042931	0.0330516	NGFR/SERPINE1/THBS1/AGT/APOH/SPARC/CXCL10/THBS2/HHEX/XDH/NFATC1/SERPINF1/DLL4/TGFB2/ISM1/THBS4/COL4A2	17
BP	GO:0033013	tetrapyrrole metabolic process	8/854	60/18670	0.00576974	0.0446386	0.0343663	ABCB6/UGT1A4/CYP1A1/AMBP/UGT1A1/HMBS/PRSS3/TCN2	8
BP	GO:0008016	regulation of heart contraction	21/854	251/18670	0.00578241	0.0446386	0.0343663	CCN2/CACNA2D3/CAV1/TMIGD3/RGS4/CACNA1C/AGT/STC1/KCNK6/SLC1A1/CACNB1/CXADR/KCNJ3/ANK2/TGFB2/SMAD7/EHD3/KCNIP3/DMPK/ACE2/BIN1	21
BP	GO:0001942	hair follicle development	10/854	86/18670	0.00580938	0.0446386	0.0343663	LGR5/INHBA/SHH/CDH3/FGF7/KRT17/CD109/TGFB2/APCDD1/FGF10	10
BP	GO:0008625	extrinsic apoptotic signaling pathway via death domain receptors	10/854	86/18670	0.00580938	0.0446386	0.0343663	FGG/ITPRIP/FGA/SERPINE1/THBS1/ICAM1/SFRP2/ATF3/HGF/PEA15	10
BP	GO:0002687	positive regulation of leukocyte migration	13/854	128/18670	0.0058163	0.0446386	0.0343663	ZP3/SERPINE1/THBS1/THY1/VEGFA/ICAM1/CXCL10/F2RL1/CCL19/THBS4/TNFSF18/SWAP70/TRPV4	13
BP	GO:0003081	regulation of systemic arterial blood pressure by renin-angiotensin	5/854	26/18670	0.00584073	0.0446386	0.0343663	F2R/AGT/CES1/F2RL1/ACE2	5
BP	GO:0043567	regulation of insulin-like growth factor receptor signaling pathway	5/854	26/18670	0.00584073	0.0446386	0.0343663	GHRHR/CDH3/MYORG/IGFBP2/IGF1	5
BP	GO:0050926	regulation of positive chemotaxis	5/854	26/18670	0.00584073	0.0446386	0.0343663	VEGFA/CDH13/SCG2/F2RL1/FGF10	5
BP	GO:0055083	monovalent inorganic anion homeostasis	5/854	26/18670	0.00584073	0.0446386	0.0343663	ATP6V1B1/ABCC2/SFRP4/SLC12A7/SLC9A3R1	5
BP	GO:0071711	basement membrane organization	5/854	26/18670	0.00584073	0.0446386	0.0343663	MMP11/HPN/PHLDB1/PXDN/COL4A1	5
BP	GO:0097066	response to thyroid hormone	5/854	26/18670	0.00584073	0.0446386	0.0343663	GCLM/HPN/CTSH/GCLC/PPARGC1A	5
BP	GO:0030850	prostate gland development	7/854	48/18670	0.00585406	0.0446748	0.0343941	SHH/ALOX15B/GLI2/ANXA1/SERPINF1/CRIP1/FGF10	7
BP	GO:0031100	animal organ regeneration	9/854	73/18670	0.00592288	0.0450662	0.0346954	UGT1A1/NR0B2/CPB2/APOA1/VTN/NR4A3/BAAT/HGF/SULF2	9
BP	GO:0060350	endochondral bone morphogenesis	9/854	73/18670	0.00592288	0.0450662	0.0346954	MEF2D/COL1A1/COMP/COL14A1/STC1/TMEM119/SMPD3/NAB1/TRPV4	9
BP	GO:0001659	temperature homeostasis	16/854	173/18670	0.00593429	0.0450662	0.0346954	HTR2A/FFAR4/IRF4/DIO2/PTGS2/CAV1/ALDH1A1/VEGFA/PPARGC1B/CXCR4/MFAP2/LEPR/ELOVL6/PPARGC1A/LAMA4/EGR1	16
BP	GO:0035265	organ growth	18/854	204/18670	0.00596277	0.0450662	0.0346954	RBP4/G6PD/COMP/ECM1/RGS4/BASP1/SHH/AGT/COL14A1/FGF7/STC1/SMPD3/LEPR/PDGFRB/TGFB2/WWC2/FGF10/IGF1	18
BP	GO:0045766	positive regulation of angiogenesis	18/854	204/18670	0.00596277	0.0450662	0.0346954	PTGS2/SERPINE1/ANGPTL4/APLNR/THBS1/ECM1/VEGFA/RUNX1/CTSH/SFRP2/CXCR4/EPHA1/JCAD/ANXA1/ITGA5/HYAL1/HGF/LRG1	18
BP	GO:0007200	phospholipase C-activating G protein-coupled receptor signaling pathway	11/854	100/18670	0.00596937	0.0450662	0.0346954	HTR2A/LPAR3/F2R/AGT/HOMER1/F2/ADRA2A/SLC9A3R1/F2RL1/TGM2/GRP	11
BP	GO:0022600	digestive system process	11/854	100/18670	0.00596937	0.0450662	0.0346954	RBP4/AKR1C1/APOA1/GCNT3/SCARB1/ADRA2A/MUC13/F11R/NPC1L1/FGF10/SLC5A1	11
BP	GO:0071902	positive regulation of protein serine/threonine kinase activity	26/854	334/18670	0.00597472	0.0450662	0.0346954	HTR2A/EGF/LPAR3/THBS1/F2R/TPD52L1/VEGFA/NRK/CDC6/CXCR4/ADRA2A/LTF/TGFB3/MUC20/PDGFRB/ROR2/ROBO1/TGFA/HGF/PAK3/CCL19/NOX4/FGF10/PEA15/IGF1/CCND2	26
BP	GO:0006639	acylglycerol metabolic process	13/854	129/18670	0.00620555	0.046721	0.0359695	ANG/CAV1/PLIN5/APOB/ABHD2/DGKI/APOH/APOA1/AADAC/PCK2/SCARB1/LIPG/AGMO	13
BP	GO:0034405	response to fluid shear stress	6/854	37/18670	0.00621209	0.046721	0.0359695	PTGS2/ASS1/TGFB3/PDGFRB/CA2/SMAD7	6
BP	GO:0070085	glycosylation	22/854	269/18670	0.00625301	0.0469608	0.0361541	EXTL1/CHP1/B4GALNT2/B3GNT9/ST3GAL5/GALNT3/FUT9/GAL3ST1/GCNT3/GALNT12/ENTPD5/MUC13/MUC20/GALNT4/CHST4/ST6GALNAC5/B3GNT3/GXYLT2/B3GALT2/ASGR2/B3GALT5/MGAT3	22
BP	GO:1902107	positive regulation of leukocyte differentiation	14/854	144/18670	0.00632296	0.0474177	0.0365058	CD83/SHH/EGR3/PPARGC1B/RUNX1/GLI2/IL34/LILRB2/ANXA1/ZFP36L1/CA2/ROR2/VNN1/CCL19	14
BP	GO:0010927	cellular component assembly involved in morphogenesis	12/854	115/18670	0.0063792	0.0475834	0.0366334	MYLK3/KLHL41/PHLDB1/RFX2/TTN/ANK2/PDGFRB/UGT8/LDB3/CFL2/CSRP1/MYH10	12
BP	GO:0046513	ceramide biosynthetic process	8/854	61/18670	0.00638114	0.0475834	0.0366334	CCN1/ST3GAL5/GAL3ST1/SMPD3/UGT8/FA2H/DEGS2/B3GALT2	8
BP	GO:2000514	regulation of CD4-positive, alpha-beta T cell activation	8/854	61/18670	0.00638114	0.0475834	0.0366334	LGALS9C/IRF4/CD83/LGALS9B/RUNX1/ANXA1/SMAD7/CCL19	8
BP	GO:0006590	thyroid hormone generation	4/854	17/18670	0.00641831	0.0475834	0.0366334	DIO2/DUOXA2/DUOX2/HPN	4
BP	GO:0006740	NADPH regeneration	4/854	17/18670	0.00641831	0.0475834	0.0366334	PGD/G6PD/IDH1/TKT	4
BP	GO:0010744	positive regulation of macrophage derived foam cell differentiation	4/854	17/18670	0.00641831	0.0475834	0.0366334	APOB/AGT/ALOX15B/PLA2G2A	4
BP	GO:0035988	chondrocyte proliferation	4/854	17/18670	0.00641831	0.0475834	0.0366334	CCN2/COMP/STC1/LTF	4
BP	GO:0061577	calcium ion transmembrane transport via high voltage-gated calcium channel	4/854	17/18670	0.00641831	0.0475834	0.0366334	G6PD/CACNA1C/CACNB1/BIN1	4
BP	GO:0048259	regulation of receptor-mediated endocytosis	11/854	101/18670	0.00643014	0.0476032	0.0366486	SERPINE1/SELE/EGF/VEGFA/GREM1/SFRP4/VTN/PLCG2/EFNB2/CCL19/HIP1	11
BP	GO:0060759	regulation of response to cytokine stimulus	17/854	190/18670	0.00646255	0.0477751	0.036781	H2BC11/CAV1/ECM1/AGPAT2/SOCS3/TSLP/RUNX1/APOA1/PXDN/CXCR4/IL1RN/ROBO1/F2RL1/PALM3/HSPA1B/HSPA1A/TREX1	17
BP	GO:1901616	organic hydroxy compound catabolic process	9/854	74/18670	0.00647667	0.0478115	0.036809	SORD/DIO2/AKR1B10/MOXD1/AKR1C3/SULT1C4/CYP4F12/CYP4F3/SCARB1	9
BP	GO:0048546	digestive tract morphogenesis	7/854	49/18670	0.00656647	0.048337	0.0372136	SHH/EPHB3/GLI2/SFRP2/SOX17/TCF21/FGF10	7
BP	GO:1904707	positive regulation of vascular smooth muscle cell proliferation	7/854	49/18670	0.00656647	0.048337	0.0372136	HTR1B/MEF2D/AGT/MMP2/NR4A3/HPGD/IGF1	7
BP	GO:0046165	alcohol biosynthetic process	16/854	175/18670	0.00661404	0.0483537	0.0372264	G6PD/TM7SF2/APOB/MOXD1/GOT1/CES1/CYP51A1/APOA1/SPR/PLCG2/PCK2/HMGCS2/ELOVL6/NPC1L1/MSMO1/DKK3	16
BP	GO:0120032	regulation of plasma membrane bounded cell projection assembly	16/854	175/18670	0.00661404	0.0483537	0.0372264	CAV1/GAP43/ZMYND10/KLHL41/ICAM1/DPYSL3/TGFB3/RAP1GAP/CDC42EP3/SH3YL1/PLD1/F2RL1/COBL/CCL19/PALM/TENM2	16
BP	GO:2000181	negative regulation of blood vessel morphogenesis	16/854	175/18670	0.00661404	0.0483537	0.0372264	NGFR/SERPINE1/THBS1/AGT/APOH/SPARC/CXCL10/THBS2/HHEX/XDH/SERPINF1/DLL4/TGFB2/ISM1/THBS4/COL4A2	16
BP	GO:0003231	cardiac ventricle development	13/854	130/18670	0.00661525	0.0483537	0.0372264	CCN1/PTK7/SFRP2/LTBP1/PPP1R13L/DLL4/HEYL/ROBO2/ROBO1/TGFB2/LRP2/JAG1/SMAD7	13
BP	GO:0006638	neutral lipid metabolic process	13/854	130/18670	0.00661525	0.0483537	0.0372264	ANG/CAV1/PLIN5/APOB/ABHD2/DGKI/APOH/APOA1/AADAC/PCK2/SCARB1/LIPG/AGMO	13
BP	GO:0007605	sensory perception of sound	14/854	145/18670	0.00671342	0.0490023	0.0377258	ATP6V1B1/COL1A1/NAV2/EYA1/HPN/GJB6/GRM7/ICAM1/GABRB3/ADGRV1/GJB2/SLC9A3R1/LRP2/TPRN	14
BP	GO:0022404	molting cycle process	10/854	88/18670	0.00682715	0.0495541	0.0381506	LGR5/INHBA/SHH/CDH3/FGF7/KRT17/CD109/TGFB2/APCDD1/FGF10	10
BP	GO:0022405	hair cycle process	10/854	88/18670	0.00682715	0.0495541	0.0381506	LGR5/INHBA/SHH/CDH3/FGF7/KRT17/CD109/TGFB2/APCDD1/FGF10	10
BP	GO:0034103	regulation of tissue remodeling	10/854	88/18670	0.00682715	0.0495541	0.0381506	AGT/PPARGC1B/GREM1/SPP1/TMEM119/TNFRSF11B/LEPR/CA2/PDK4/THBS4	10
BP	GO:0098773	skin epidermis development	10/854	88/18670	0.00682715	0.0495541	0.0381506	LGR5/INHBA/SHH/CDH3/FGF7/KRT17/CD109/TGFB2/APCDD1/FGF10	10
BP	GO:0007176	regulation of epidermal growth factor-activated receptor activity	5/854	27/18670	0.00690316	0.0497583	0.0383078	GPRC5A/EGF/EREG/ADRA2A/TGFA	5
BP	GO:0046885	regulation of hormone biosynthetic process	5/854	27/18670	0.00690316	0.0497583	0.0383078	AKR1C3/STC2/PPARGC1A/EGR1/DKK3	5
BP	GO:0061437	renal system vasculature development	5/854	27/18670	0.00690316	0.0497583	0.0383078	PDGFRB/EGR1/TCF21/ACTA2/NOTCH3	5
BP	GO:0061440	kidney vasculature development	5/854	27/18670	0.00690316	0.0497583	0.0383078	PDGFRB/EGR1/TCF21/ACTA2/NOTCH3	5
BP	GO:2001039	negative regulation of cellular response to drug	5/854	27/18670	0.00690316	0.0497583	0.0383078	RGS4/TXN/NR4A3/HGF/PALM	5
BP	GO:0051402	neuron apoptotic process	20/854	239/18670	0.00694801	0.049943	0.03845	CRLF1/GCLM/G6PD/CNTFR/NGFR/CCL2/F2R/NQO1/GABRB3/NR4A3/BDNF/TGFB3/GCLC/PPARGC1A/TGFB2/PAK3/SLC30A10/NLRP1/LRP1/VSTM2L	20
BP	GO:2000116	regulation of cysteine-type endopeptidase activity	20/854	239/18670	0.00694801	0.049943	0.03845	CCN1/CCK/CCN2/NGFR/PTGS2/DPEP1/THBS1/F2R/PERP/VEGFA/CRYAB/CD44/CTSH/SFRP2/LTF/XDH/ROBO1/HGF/NLRP1/HIP1	20
CC	GO:0062023	collagen-containing extracellular matrix	82/887	406/19717	3.10839e-31	1.48581e-28	1.23681e-28	CCN1/FGG/TIMP1/CCN2/ZP3/ANG/ITIH1/VCAN/COL3A1/FGA/SERPINE1/AMBP/COL1A1/SERPINE2/COL8A2/COMP/BGN/THBS1/COL1A2/ECM1/LOXL1/PLG/NAV2/MMP23B/CDH2/SHH/SOD3/AGT/GREM1/MMP2/FN1/COL14A1/LUM/APOH/LGALS1/APOA1/VTN/F2/CTHRC1/COL5A1/SPARC/ICAM1/MGP/HMCN1/ADAMTS4/CTSH/CDH13/THBS2/COL16A1/PXDN/SFRP2/MXRA5/IGFBP7/TIMP2/COL5A2/TGFB3/MFAP2/MFGE8/LTBP1/CCDC80/LTBP2/EDIL3/ANXA1/ADAMTS10/SERPINF1/SLPI/COL8A1/SPARCL1/…	82
CC	GO:0045177	apical part of cell	60/887	384/19717	2.40078e-17	5.73786e-15	4.77628e-15	FAP/CNTFR/SLC17A1/MGST1/CA4/ATP6V1B1/MGAM/ABCC2/DPEP1/PAPPA2/SLC26A3/THY1/CDH2/SLC6A19/DUOXA2/CYP4F12/ZMYND10/PARD6B/HOMER1/FN1/DUOX2/HPN/GJB6/STC1/REEP6/CD44/PATJ/SLC9A3/MUC13/ABCB1/MUC20/SLC1A1/ANXA1/EPB41L4B/MAL2/SLC9A3R1/FAT4/ANK2/SLC10A2/SHROOM3/MSN/PDGFRB/CA2/RAB27B/PLD1/LRP2/CRB3/JAG1/ACY3/DCHS1/NPC1L1/IGFBP2/PDZK1/CDHR2/LRP1/NOX4/TRPV4/MYO5B/PTPRH/SLC5A1	60
CC	GO:0005788	endoplasmic reticulum lumen	51/887	309/19717	6.40338e-16	1.02027e-13	8.49291e-14	CCN1/FGG/TIMP1/ALB/VCAN/COL3A1/PTGS2/FGA/COL1A1/COL8A2/APOB/THBS1/COL1A2/CDH2/SHH/TMEM132A/STC2/CES1/CERCAM/FN1/FKBP10/COL14A1/CALU/SPP1/LGALS1/APOA1/VTN/F2/COL5A1/COL16A1/SCG2/IGFBP7/COL5A2/MFGE8/MXRA8/LTBP1/FSTL1/DBI/FSTL3/COL8A1/SPARCL1/COL4A1/F5/COL10A1/RCN3/PENK/SLC27A2/FMO1/ARSD/COL4A2/ADAMTSL1	51
CC	GO:0016324	apical plasma membrane	49/887	318/19717	3.78359e-14	4.52139e-12	3.76368e-12	CNTFR/SLC17A1/CA4/ATP6V1B1/MGAM/ABCC2/DPEP1/PAPPA2/SLC26A3/THY1/CDH2/SLC6A19/CYP4F12/ZMYND10/PARD6B/FN1/DUOX2/HPN/GJB6/STC1/CD44/PATJ/SLC9A3/MUC13/ABCB1/MUC20/SLC1A1/ANXA1/MAL2/SLC9A3R1/ANK2/SLC10A2/SHROOM3/MSN/PDGFRB/RAB27B/PLD1/LRP2/CRB3/JAG1/ACY3/NPC1L1/IGFBP2/PDZK1/CDHR2/NOX4/TRPV4/PTPRH/SLC5A1	49
CC	GO:0031253	cell projection membrane	41/887	326/19717	2.76642e-09	2.3494e-07	1.95568e-07	FAP/CA4/ABCC2/SHISA9/DPEP1/SLC26A3/GAP43/THY1/SLC6A19/PKD1L1/CD44/ADGRV1/SLC7A11/SCARB1/RASGRP2/CA9/SLC9A3/KIRREL1/MUC20/MXRA8/JCAD/SH3YL1/ITGA5/SLC9A3R1/MSN/LAMP5/ROBO2/LRP2/HHIP/CNGA1/EHD3/NPC1L1/PDZK1/ANTXR1/CDHR2/ACE2/SLC3A1/TRPV4/PALM/PTPRH/SLC5A1	41
CC	GO:0031091	platelet alpha granule	20/887	91/19717	2.94904e-09	2.3494e-07	1.95568e-07	FGG/TIMP1/ALB/FGA/SERPINE1/SERPINE2/EGF/THBS1/PLG/VEGFA/FN1/LHFPL2/SPARC/CD109/THBS2/TGFB3/TGFB2/HGF/F5/IGF1	20
CC	GO:0031093	platelet alpha granule lumen	16/887	67/19717	3.19863e-08	2.18421e-06	1.81817e-06	FGG/TIMP1/ALB/FGA/SERPINE1/EGF/THBS1/PLG/VEGFA/FN1/SPARC/TGFB3/TGFB2/HGF/F5/IGF1	16
CC	GO:0098644	complex of collagen trimers	9/887	19/19717	4.45674e-08	2.6629e-06	2.21664e-06	COL3A1/COL1A1/COL1A2/LUM/COL5A1/COL5A2/COL8A1/COL4A1/COL4A2	9
CC	GO:0031526	brush border membrane	14/887	53/19717	5.86367e-08	3.11426e-06	2.59236e-06	CA4/ABCC2/SLC26A3/SLC6A19/SLC7A11/SLC9A3/SLC9A3R1/LRP2/NPC1L1/PDZK1/CDHR2/ACE2/SLC3A1/SLC5A1	14
CC	GO:0005604	basement membrane	18/887	95/19717	2.02542e-07	9.56931e-06	7.96565e-06	TIMP1/ANG/COL8A2/LOXL1/FN1/VTN/COL5A1/SPARC/HMCN1/THBS2/CCDC80/SERPINF1/COL8A1/LAMA4/COL4A1/APLP1/THBS4/COL4A2	18
CC	GO:0098858	actin-based cell projection	28/887	208/19717	2.20214e-07	9.56931e-06	7.96565e-06	TUBB3/ATP6V1B1/DPEP1/GAP43/PLEKHG6/ARL4C/CD44/ANKS4B/ADGRV1/IQGAP2/SCARB1/CA9/MUC20/ADGRA2/CXADR/SLC9A3R1/SLC10A2/MSN/CA2/TPRN/PDZK1/ANTXR1/CDHR2/TRPV4/PALM/TENM2/PTPRH/ACTA2	28
CC	GO:0031528	microvillus membrane	9/887	23/19717	3.34973e-07	1.33431e-05	1.1107e-05	DPEP1/SCARB1/CA9/MUC20/SLC9A3R1/MSN/PDZK1/CDHR2/PTPRH	9
CC	GO:0005902	microvillus	16/887	83/19717	7.49371e-07	2.75538e-05	2.29362e-05	ATP6V1B1/DPEP1/PLEKHG6/CD44/ANKS4B/IQGAP2/SCARB1/CA9/MUC20/SLC9A3R1/SLC10A2/MSN/CA2/PDZK1/CDHR2/PTPRH	16
CC	GO:0005903	brush border	17/887	99/19717	1.86054e-06	6.35243e-05	5.28786e-05	CA4/ABCC2/SLC26A3/SLC6A19/ANKS4B/SLC7A11/SLC9A3/SLC15A1/SLC9A3R1/LRP2/NPC1L1/MYH10/PDZK1/CDHR2/ACE2/SLC3A1/SLC5A1	17
CC	GO:0005583	fibrillar collagen trimer	6/887	11/19717	3.10042e-06	9.2625e-05	7.71025e-05	COL3A1/COL1A1/COL1A2/LUM/COL5A1/COL5A2	6
CC	GO:0098643	banded collagen fibril	6/887	11/19717	3.10042e-06	9.2625e-05	7.71025e-05	COL3A1/COL1A1/COL1A2/LUM/COL5A1/COL5A2	6
CC	GO:0005581	collagen trimer	15/887	87/19717	7.06171e-06	0.000198559	0.000165283	COL3A1/COL1A1/COL8A2/COL1A2/COL14A1/LUM/CTHRC1/COL5A1/COL16A1/COL5A2/C1QTNF1/COL8A1/COL4A1/COL10A1/COL4A2	15
CC	GO:0031983	vesicle lumen	33/887	327/19717	1.33483e-05	0.000354471	0.000295067	FGG/TIMP1/ALB/IDH1/FGA/SERPINE1/EGF/GPI/APOB/THBS1/ECM1/PLG/CANT1/VEGFA/FN1/APOH/APOA1/CNN2/SPARC/TTR/CTSH/TIMP2/LTF/TGFB3/SLPI/TGFB2/HGF/F5/LRG1/PENK/CXCL1/IGF1/GRP	33
CC	GO:0034774	secretory granule lumen	32/887	321/19717	2.29445e-05	0.000577234	0.000480499	FGG/TIMP1/ALB/IDH1/FGA/SERPINE1/EGF/GPI/THBS1/ECM1/PLG/CANT1/VEGFA/FN1/APOH/APOA1/CNN2/SPARC/TTR/CTSH/TIMP2/LTF/TGFB3/SLPI/TGFB2/HGF/F5/LRG1/PENK/CXCL1/IGF1/GRP	32
CC	GO:0060205	cytoplasmic vesicle lumen	32/887	325/19717	2.93218e-05	0.000700791	0.000583349	FGG/TIMP1/ALB/IDH1/FGA/SERPINE1/EGF/GPI/THBS1/ECM1/PLG/CANT1/VEGFA/FN1/APOH/APOA1/CNN2/SPARC/TTR/CTSH/TIMP2/LTF/TGFB3/SLPI/TGFB2/HGF/F5/LRG1/PENK/CXCL1/IGF1/GRP	32
CC	GO:0072562	blood microparticle	19/887	147/19717	3.3864e-05	0.00077081	0.000641635	FGG/ALB/ITIH1/FGA/AMBP/ANGPTL4/PLG/AGT/FN1/PON1/APOA1/VTN/F2/MSN/C1R/C8A/C8G/HSPA1B/HSPA1A	19
CC	GO:0005925	focal adhesion	37/887	405/19717	3.74168e-05	0.000812964	0.000676724	FAP/CAV1/CHP1/THY1/CDH2/PTK7/TES/TPM4/PALLD/RHOU/CNN2/CD44/ICAM1/SCARF2/CDH13/TSPAN9/ANXA1/ITGA5/ITGA11/ITGBL1/RND3/MSN/PDGFRB/EFNB2/FBLIM1/FHL3/PDLIM7/EHD3/CSRP1/LRP1/FHL2/NOX4/TGM2/HSPA1B/TRPV4/HSPA1A/VIM	37
CC	GO:0098862	cluster of actin-based cell projections	19/887	150/19717	4.49231e-05	0.000919567	0.000765462	CA4/ABCC2/SLC26A3/SLC6A19/ANKS4B/ADGRV1/SLC7A11/SLC9A3/SLC15A1/SLC9A3R1/LRP2/TPRN/NPC1L1/MYH10/PDZK1/CDHR2/ACE2/SLC3A1/SLC5A1	19
CC	GO:0016323	basolateral plasma membrane	24/887	217/19717	4.61708e-05	0.000919567	0.000765462	SLC51A/SLC38A3/LIN7A/ATP6V1B1/SLCO1B1/CDH2/CD44/ALPK2/NKD2/CD1D/ADRA2A/CA9/MUC20/LEPR/HPGD/ANXA1/CXADR/ANK2/MSN/CA2/TGFA/LRP1/PALM/CLDN7	24
CC	GO:0030017	sarcomere	23/887	204/19717	4.88978e-05	0.000934926	0.000778247	PDLIM3/MYH1/CACNA1C/PSMA6/KLHL41/PDLIM4/HOMER1/TPM4/MMP2/CRYAB/PALLD/TTN/SMN2/ANK2/MYH2/LDB3/FHL3/PDLIM7/CFL2/CSRP1/FHL2/BIN1/MYZAP	23
CC	GO:0030055	cell-substrate junction	37/887	412/19717	5.38055e-05	0.000989193	0.00082342	FAP/CAV1/CHP1/THY1/CDH2/PTK7/TES/TPM4/PALLD/RHOU/CNN2/CD44/ICAM1/SCARF2/CDH13/TSPAN9/ANXA1/ITGA5/ITGA11/ITGBL1/RND3/MSN/PDGFRB/EFNB2/FBLIM1/FHL3/PDLIM7/EHD3/CSRP1/LRP1/FHL2/NOX4/TGM2/HSPA1B/TRPV4/HSPA1A/VIM	37
CC	GO:0043292	contractile fiber	25/887	234/19717	5.74348e-05	0.00101681	0.000846408	PDLIM3/MYH1/CACNA1C/PSMA6/KLHL41/PDLIM4/HOMER1/TPM4/MMP2/CRYAB/PALLD/TTN/SMN2/ANK2/MYH2/LDB3/FHL3/PDLIM7/CFL2/CSRP1/FHL2/CALD1/BIN1/MYZAP/ACTA2	25
CC	GO:0030016	myofibril	24/887	224/19717	7.66686e-05	0.00130884	0.0010895	PDLIM3/MYH1/CACNA1C/PSMA6/KLHL41/PDLIM4/HOMER1/TPM4/MMP2/CRYAB/PALLD/TTN/SMN2/ANK2/MYH2/LDB3/FHL3/PDLIM7/CFL2/CSRP1/FHL2/CALD1/BIN1/MYZAP	24
CC	GO:0030018	Z disc	17/887	132/19717	9.0345e-05	0.00148913	0.00123958	PDLIM3/CACNA1C/PDLIM4/HOMER1/CRYAB/PALLD/TTN/SMN2/ANK2/LDB3/FHL3/PDLIM7/CFL2/CSRP1/FHL2/BIN1/MYZAP	17
CC	GO:0019897	extrinsic component of plasma membrane	19/887	165/19717	0.000163369	0.00260302	0.00216679	CDH18/SERPINE2/PLG/H2BC1/CDH2/DGKI/CDH11/CDH3/PLEKHA4/CDH13/OLFM2/MFGE8/ANXA1/RGS1/STYK1/SMAD7/MYZAP/GNAZ/HIP1	19
CC	GO:0031674	I band	17/887	143/19717	0.000242131	0.0037335	0.00310782	PDLIM3/CACNA1C/PDLIM4/HOMER1/CRYAB/PALLD/TTN/SMN2/ANK2/LDB3/FHL3/PDLIM7/CFL2/CSRP1/FHL2/BIN1/MYZAP	17
CC	GO:0031252	cell leading edge	34/887	403/19717	0.000344981	0.00515315	0.00428956	TUBB3/FAP/SHISA9/THY1/CDH2/DUOXA2/KLHL41/PDLIM4/DUOX2/PALLD/CD44/ADGRV1/DPYSL3/IQGAP2/CXCR4/RASGRP2/JCAD/SH3YL1/ITGA5/RAB3IP/SLC9A3R1/STMN2/LAMP5/ROBO2/PDLIM7/COBL/MYH10/ANTXR1/SWAP70/TRPV4/CDC42BPG/PALM/ACTA2/VIM	34
CC	GO:0032432	actin filament bundle	11/887	75/19717	0.000504152	0.00730257	0.00607878	PDLIM3/PDLIM4/TPM4/CRYAB/CNN2/FBLIM1/LDB3/FHL3/PDLIM7/MYH10/NOX4	11
CC	GO:0150034	distal axon	26/887	285/19717	0.000523497	0.00735975	0.00612637	CCK/TUBB3/ANG/HTR1B/GAP43/GOT1/THY1/BASP1/DGKI/PALLD/DPYSL3/TIMP2/UNC13C/CXADR/STMN2/LAMP5/BOC/COBL/PENK/MYH10/KCNIP3/MAP1B/LRP1/NCS1/TRPV4/TENM2	26
CC	GO:0005911	cell-cell junction	34/887	416/19717	0.000609763	0.00832763	0.00693205	LIN7A/ABCC2/PERP/MYH1/CDH2/PARD6B/PTK7/HPN/GJB6/FRMD6/CNN2/PATJ/SGCA/MARVELD3/GJB5/GJB2/KIRREL1/MXRA8/CTNND2/F11R/JCAD/ITGA5/EPB41L4B/CXADR/ANK2/SHROOM3/CRB3/JAG1/GJB4/ILDR1/TRPV4/SLC5A1/JAM2/CLDN7	34
CC	GO:1904724	tertiary granule lumen	9/887	55/19717	0.000715415	0.00924916	0.00769915	IDH1/CANT1/CNN2/CTSH/PRSS3/TIMP2/LTF/LRG1/CXCL1	9
CC	GO:0030426	growth cone	18/887	171/19717	0.00071594	0.00924916	0.00769915	TUBB3/ANG/GAP43/THY1/BASP1/PALLD/DPYSL3/TIMP2/CXADR/STMN2/LAMP5/BOC/COBL/MYH10/MAP1B/LRP1/TRPV4/TENM2	18
CC	GO:0001725	stress fiber	10/887	67/19717	0.000779848	0.00938197	0.0078097	PDLIM3/PDLIM4/TPM4/CNN2/FBLIM1/LDB3/FHL3/PDLIM7/MYH10/NOX4	10
CC	GO:0097517	contractile actin filament bundle	10/887	67/19717	0.000779848	0.00938197	0.0078097	PDLIM3/PDLIM4/TPM4/CNN2/FBLIM1/LDB3/FHL3/PDLIM7/MYH10/NOX4	10
CC	GO:0030175	filopodium	13/887	104/19717	0.000785102	0.00938197	0.0078097	TUBB3/GAP43/ARL4C/IQGAP2/ADGRA2/CXADR/SLC9A3R1/MSN/ANTXR1/TRPV4/PALM/TENM2/ACTA2	13
CC	GO:0030427	site of polarized growth	18/887	176/19717	0.00100268	0.0116897	0.00973071	TUBB3/ANG/GAP43/THY1/BASP1/PALLD/DPYSL3/TIMP2/CXADR/STMN2/LAMP5/BOC/COBL/MYH10/MAP1B/LRP1/TRPV4/TENM2	18
CC	GO:0016342	catenin complex	6/887	29/19717	0.0015908	0.0181049	0.0150708	CDH18/CDH2/CDH11/CDH3/CDH13/SMAD7	6
CC	GO:0019898	extrinsic component of membrane	25/887	295/19717	0.00187521	0.0208453	0.017352	CDH18/CNTFR/ATP6V1B1/SERPINE2/PLG/H2BC1/CDH2/SOCS3/DGKI/CDH11/ALOX15B/CDH3/PLEKHA4/CDH13/OLFM2/MFGE8/ANXA1/RGS1/STYK1/SMAD7/EHD2/DEFB1/MYZAP/GNAZ/HIP1	25
CC	GO:0042641	actomyosin	10/887	79/19717	0.00279347	0.0303473	0.0252616	PDLIM3/PDLIM4/TPM4/CNN2/FBLIM1/LDB3/FHL3/PDLIM7/MYH10/NOX4	10
CC	GO:0005901	caveola	10/887	80/19717	0.00306686	0.0325769	0.0271175	HTR2A/PTGS2/CAV1/SELE/F2R/CDH13/SCARB1/CAVIN1/CAVIN3/EHD2	10
CC	GO:0005938	cell cortex	25/887	308/19717	0.00333042	0.0346074	0.0288077	CCN2/FAM110C/CAV1/SELE/CDH2/PARD6B/TPM4/RHOU/PHLDB1/GRM7/HMCN1/RIMS1/UNC13C/RND3/SHROOM3/WIPF3/COBL/FRMPD1/MYH10/CALD1/PCLO/MYZAP/TRPV4/HIP1/MYO5B	25
CC	GO:0045121	membrane raft	25/887	315/19717	0.00444825	0.0452396	0.0376582	HTR2A/PTGS2/CAV1/SELE/F2R/THY1/CDH2/SHH/ICAM1/SGCA/CDH13/SCARB1/PLLP/KIRREL1/ADGRG1/CXADR/MAL2/SLC9A3R1/CAVIN1/CAVIN3/ANK2/EHD2/EFNB1/PDZK1/ACE2	25
CC	GO:0098857	membrane microdomain	25/887	316/19717	0.00463101	0.0461171	0.0383886	HTR2A/PTGS2/CAV1/SELE/F2R/THY1/CDH2/SHH/ICAM1/SGCA/CDH13/SCARB1/PLLP/KIRREL1/ADGRG1/CXADR/MAL2/SLC9A3R1/CAVIN1/CAVIN3/ANK2/EHD2/EFNB1/PDZK1/ACE2	25
MF	GO:0005201	extracellular matrix structural constituent	41/851	163/17696	8.1362e-19	6.78559e-16	5.64395e-16	CCN1/FGG/ZP3/VCAN/COL3A1/FGA/COL1A1/COL8A2/COMP/BGN/THBS1/COL1A2/ECM1/FN1/COL14A1/LUM/VTN/CTHRC1/COL5A1/SPARC/MGP/HMCN1/THBS2/COL16A1/PXDN/MXRA5/IGFBP7/COL5A2/MFAP2/MFGE8/LTBP1/LTBP2/EDIL3/COL8A1/LAMA4/EFEMP1/COL4A1/COL10A1/TNXB/COL4A2/AEBP1	41
MF	GO:0005539	glycosaminoglycan binding	41/851	229/17696	2.41079e-13	1.0053e-10	8.36164e-11	CCN1/LRTM1/CCN2/ANG/CCL15/NELL1/VCAN/SERPINE2/COMP/APOB/BGN/THBS1/NAV2/SHH/VEGFA/SOD3/FN1/FGF7/APOH/VTN/F2/CD44/COL5A1/CXCL10/THBS2/DPYSL3/LIPG/HAPLN3/LTF/ADGRG1/CCDC80/LTBP2/FSTL1/APLP1/THBS4/TNXB/SULF2/FGF10/HABP2/SUSD5/ANXA4	41
MF	GO:0015020	glucuronosyltransferase activity	15/851	33/17696	6.93946e-12	1.92917e-09	1.6046e-09	UGT1A9/UGT1A8/UGT1A7/UGT1A3/UGT1A6/UGT2B11/UGT1A4/EXTL1/UGT2B28/UGT1A1/UGT2B17/UGT1A5/UGT2B7/UGT2A3/UGT2B15	15
MF	GO:0048018	receptor ligand activity	60/851	482/17696	1.2558e-11	2.61835e-09	2.17783e-09	CCK/CRLF1/TIMP1/CCN2/ZP3/CCL15/OSGIN1/BMP3/EGF/GPI/FGF5/INHBA/CCL2/FGF19/SHH/VEGFA/AGT/TSLP/STC2/GREM1/CTF1/EREG/SPP1/FGF7/STC1/CLEC11A/APOA1/F2/MIA/SCGB3A1/GUCA2A/TTR/BDNF/CXCL10/NPY/SEMA5B/SFRP2/SCG2/FAM3B/TNFRSF11B/IL1RN/IL34/TGFB3/TAFA5/NBL1/TGFB2/EFEMP1/TGFA/JAG1/HGF/GPHA2/PENK/CCL19/THBS4/CXCL1/TNFSF18/SEMA6C/FGF10/IGF1/GRP	60
MF	GO:0030546	signaling receptor activator activity	60/851	487/17696	1.93244e-11	3.13772e-09	2.60981e-09	CCK/CRLF1/TIMP1/CCN2/ZP3/CCL15/OSGIN1/BMP3/EGF/GPI/FGF5/INHBA/CCL2/FGF19/SHH/VEGFA/AGT/TSLP/STC2/GREM1/CTF1/EREG/SPP1/FGF7/STC1/CLEC11A/APOA1/F2/MIA/SCGB3A1/GUCA2A/TTR/BDNF/CXCL10/NPY/SEMA5B/SFRP2/SCG2/FAM3B/TNFRSF11B/IL1RN/IL34/TGFB3/TAFA5/NBL1/TGFB2/EFEMP1/TGFA/JAG1/HGF/GPHA2/PENK/CCL19/THBS4/CXCL1/TNFSF18/SEMA6C/FGF10/IGF1/GRP	60
MF	GO:0008201	heparin binding	32/851	169/17696	2.25735e-11	3.13772e-09	2.60981e-09	CCN1/LRTM1/CCN2/ANG/CCL15/NELL1/SERPINE2/COMP/APOB/THBS1/NAV2/VEGFA/SOD3/FN1/FGF7/APOH/VTN/F2/COL5A1/CXCL10/THBS2/LIPG/LTF/ADGRG1/CCDC80/LTBP2/FSTL1/APLP1/THBS4/TNXB/FGF10/ANXA4	32
MF	GO:0008194	UDP-glycosyltransferase activity	30/851	151/17696	2.71451e-11	3.23414e-09	2.69002e-09	UGT1A9/UGT1A8/UGT2B10/UGT1A7/UGT1A3/UGT1A6/UGT2B11/UGT1A4/EXTL1/UGT2B28/UGT1A1/UGT2B17/UGT1A5/B4GALNT2/B3GNT9/GALNT3/UGT2B7/GCNT3/GALNT12/NDST4/UGT2A3/UGT2B15/UGT8/HYAL1/GALNT4/B3GNT3/GXYLT2/B3GALT2/B3GALT5/MGAT3	30
MF	GO:1901681	sulfur compound binding	38/851	250/17696	2.83775e-10	2.95836e-08	2.46063e-08	CCN1/LRTM1/CCN2/ANG/CCL15/MGST1/NELL1/SERPINE2/COMP/APOB/THBS1/NAV2/VEGFA/SOD3/FN1/FGF7/APOH/VTN/F2/OGDHL/COL5A1/CHST12/CXCL10/THBS2/DPYSL3/LIPG/LTF/ADGRG1/CCDC80/LTBP2/FSTL1/DBI/APLP1/THBS4/LRP1/TNXB/FGF10/ANXA4	38
MF	GO:0031406	carboxylic acid binding	31/851	193/17696	3.22567e-09	2.98912e-07	2.48622e-07	TAT/UGT1A9/UGT1A8/AKR1C2/UGT1A7/FFAR4/UGT1A3/ALB/AKR1C1/VCAN/GLDC/PHYH/SELE/UGT1A1/P3H3/ASS1/GOT1/LCN12/CASTOR1/GRM7/CD44/CRABP2/HAPLN3/LRAT/GCLC/SLC1A1/CYP4F11/STARD5/GLRB/GCHFR/SUSD5	31
MF	GO:0008083	growth factor activity	28/851	163/17696	4.01551e-09	3.34893e-07	2.7855e-07	TIMP1/CCN2/OSGIN1/BMP3/EGF/GPI/FGF5/INHBA/FGF19/VEGFA/AGT/EREG/FGF7/CLEC11A/F2/MIA/BDNF/IL34/TGFB3/TGFB2/EFEMP1/TGFA/JAG1/HGF/THBS4/CXCL1/FGF10/IGF1	28
MF	GO:0016614	oxidoreductase activity, acting on CH-OH group of donors	24/851	128/17696	8.74796e-09	6.29655e-07	5.23719e-07	AKR1C2/PTGR1/PGD/AKR1C1/G6PD/SORD/ADH1A/ME1/IDH1/AKR1B10/CBR1/AKR1C3/ALDH3A2/AKR1B15/ALDH3A1/ADH1C/AKR1C4/SPR/RDH12/AKR7A3/HPGD/HSD11B2/BDH1/HSD11B1	24
MF	GO:0016616	oxidoreductase activity, acting on the CH-OH group of donors, NAD or NADP as acceptor	23/851	119/17696	9.74628e-09	6.29655e-07	5.23719e-07	AKR1C2/PTGR1/PGD/AKR1C1/G6PD/SORD/ADH1A/ME1/IDH1/AKR1B10/CBR1/AKR1C3/AKR1B15/ALDH3A1/ADH1C/AKR1C4/SPR/RDH12/AKR7A3/HPGD/HSD11B2/BDH1/HSD11B1	23
MF	GO:0016705	oxidoreductase activity, acting on paired donors, with incorporation or reduction of molecular oxygen	27/851	159/17696	9.81476e-09	6.29655e-07	5.23719e-07	AKR1C2/CYP17A1/AKR1C1/CYP1A1/CYP2B6/PTGS2/PHYH/P3H3/MOXD1/AKR1C3/CYP4F12/AKR1C4/BBOX1/CYP51A1/FADS2/CYP4F3/CYP3A7/AGMO/TYRP1/CYP4F11/CYP2C8/CYP2C9/TRMT9B/CYP2A6/DEGS2/MSMO1/FMO1	27
MF	GO:0043177	organic acid binding	31/851	205/17696	1.41085e-08	8.40463e-07	6.9906e-07	TAT/UGT1A9/UGT1A8/AKR1C2/UGT1A7/FFAR4/UGT1A3/ALB/AKR1C1/VCAN/GLDC/PHYH/SELE/UGT1A1/P3H3/ASS1/GOT1/LCN12/CASTOR1/GRM7/CD44/CRABP2/HAPLN3/LRAT/GCLC/SLC1A1/CYP4F11/STARD5/GLRB/GCHFR/SUSD5	31
MF	GO:0005178	integrin binding	24/851	132/17696	1.64232e-08	9.13132e-07	7.59503e-07	CCN1/FAP/CCN2/COL3A1/COMP/THBS1/THY1/FN1/SPP1/VTN/COL5A1/ICAM1/COL16A1/SFRP2/TIMP2/MFGE8/EDIL3/ITGA5/CXADR/ITGBL1/THBS4/TSPAN8/TNXB/IGF1	24
MF	GO:0019838	growth factor binding	24/851	137/17696	3.4769e-08	1.81234e-06	1.50742e-06	CCN1/GHRHR/CCN2/NGFR/COL3A1/COL1A1/THBS1/COL1A2/COL5A1/S100A13/CD109/NKD2/PXDN/IGFBP7/IL1RN/TGFB3/LTBP1/LTBP2/IGFALS/DUSP1/PDGFRB/COL4A1/IGFBP2/HTRA3	24
MF	GO:0004497	monooxygenase activity	20/851	99/17696	4.09969e-08	1.96598e-06	1.63521e-06	AKR1C2/CYP17A1/AKR1C1/CYP1A1/CYP2B6/MOXD1/AKR1C3/CYP4F12/AKR1C4/CYP51A1/CYP4F3/CYP3A7/AGMO/TYRP1/CYP4F11/CYP2C8/CYP2C9/CYP2A6/MSMO1/FMO1	20
MF	GO:0005501	retinoid binding	12/851	35/17696	4.24312e-08	1.96598e-06	1.63521e-06	UGT1A9/UGT1A8/UGT1A7/RBP4/UGT1A3/UGT1A1/RBP2/LCN12/CRABP2/LRAT/ALDH1A2/C8G	12
MF	GO:0019840	isoprenoid binding	12/851	36/17696	6.08748e-08	2.67208e-06	2.22252e-06	UGT1A9/UGT1A8/UGT1A7/RBP4/UGT1A3/UGT1A1/RBP2/LCN12/CRABP2/LRAT/ALDH1A2/C8G	12
MF	GO:0005518	collagen binding	16/851	67/17696	7.96061e-08	3.31957e-06	2.76107e-06	COMP/THBS1/FN1/COL14A1/LUM/VTN/CD44/SPARC/ADGRG1/ITGA11/C1QTNF1/SPARCL1/SMAD7/ANTXR1/SPOCK1/AEBP1	16
MF	GO:0004033	aldo-keto reductase (NADP) activity	10/851	26/17696	1.65027e-07	6.55395e-06	5.45128e-06	AKR1C2/AKR1C1/AKR1B10/AKR1C3/AKR1B15/ALDH3A1/AKR1C4/SPR/RDH12/AKR7A3	10
MF	GO:0030020	extracellular matrix structural constituent conferring tensile strength	12/851	41/17696	3.07524e-07	1.14935e-05	9.55982e-06	COL3A1/COL1A1/COL8A2/COL1A2/COL14A1/COL5A1/COL16A1/COL5A2/COL8A1/COL4A1/COL10A1/COL4A2	12
MF	GO:0050839	cell adhesion molecule binding	51/851	499/17696	3.16968e-07	1.14935e-05	9.55982e-06	CCN1/FAP/FGG/CCN2/CDH18/GPRC5A/IDH1/COL3A1/FGA/COMP/THBS1/THY1/CDH2/TES/FN1/CDH11/CDH3/SPP1/VTN/CNN2/COL5A1/ICAM1/HMCN1/CDH13/COL16A1/PTPRT/SFRP2/CD1D/TIMP2/MFGE8/LILRB2/CTNND2/F11R/EDIL3/PPP1R13L/ANXA1/ITGA5/CXADR/ITGBL1/MSN/THBS4/CDHR2/TSPAN8/CALD1/SWAP70/TNXB/HSPA1A/TENM2/IGF1/PTPRH/NOTCH3	51
MF	GO:0016758	transferase activity, transferring hexosyl groups	29/851	216/17696	5.54622e-07	1.92731e-05	1.60305e-05	UGT1A9/UGT1A8/UGT1A7/UGT1A3/UGT1A6/UGT2B11/UGT1A4/EXTL1/UGT2B28/UGT1A1/UGT2B17/UGT1A5/B4GALNT2/B3GNT9/GALNT3/FUT9/UGT2B7/GCNT3/GALNT12/NDST4/UGT2A3/UGT2B15/UGT8/HYAL1/GALNT4/B3GNT3/B3GALT2/B3GALT5/MGAT3	29
MF	GO:0016757	transferase activity, transferring glycosyl groups	34/851	280/17696	6.66911e-07	2.22482e-05	1.8505e-05	UGT1A9/UGT1A8/UGT2B10/UGT1A7/GLT1D1/UGT1A3/UGT1A6/UGT2B11/UGT1A4/EXTL1/UGT2B28/UGT1A1/UGT2B17/UGT1A5/B4GALNT2/B3GNT9/ST3GAL5/GALNT3/FUT9/UGT2B7/GCNT3/GALNT12/NDST4/UGT2A3/UGT2B15/UGT8/HYAL1/GALNT4/ST6GALNAC5/B3GNT3/GXYLT2/B3GALT2/B3GALT5/MGAT3	34
MF	GO:0001972	retinoic acid binding	8/851	19/17696	1.30304e-06	4.17976e-05	3.47654e-05	UGT1A9/UGT1A8/UGT1A7/UGT1A3/UGT1A1/LCN12/CRABP2/LRAT	8
MF	GO:0016709	oxidoreductase activity, acting on paired donors, with incorporation or reduction of molecular oxygen, NAD(P)H as one donor, and incorporation of one atom of oxygen	11/851	39/17696	1.44827e-06	4.47356e-05	3.72091e-05	AKR1C2/AKR1C1/CYP1A1/AKR1C3/CYP4F12/AKR1C4/CYP51A1/CYP4F3/CYP4F11/MSMO1/FMO1	11
MF	GO:0033293	monocarboxylic acid binding	14/851	64/17696	1.61167e-06	4.75295e-05	3.9533e-05	UGT1A9/UGT1A8/AKR1C2/UGT1A7/FFAR4/UGT1A3/ALB/AKR1C1/UGT1A1/LCN12/CRABP2/LRAT/CYP4F11/STARD5	14
MF	GO:0046906	tetrapyrrole binding	22/851	145/17696	1.65271e-06	4.75295e-05	3.9533e-05	CYP17A1/ABCB6/CYP1A1/CYP2B6/PTGS2/CYB5A/AMBP/CYP4F12/STC2/DUOX2/CYP51A1/CYP4F3/PXDN/CYP3A7/CYP4F11/CYP2C8/TCN2/CYP2C9/FA2H/GUCY1A2/CYP2A6/NOX4	22
MF	GO:0020037	heme binding	21/851	135/17696	1.87786e-06	5.22046e-05	4.34215e-05	CYP17A1/ABCB6/CYP1A1/CYP2B6/PTGS2/CYB5A/AMBP/CYP4F12/STC2/DUOX2/CYP51A1/CYP4F3/PXDN/CYP3A7/CYP4F11/CYP2C8/CYP2C9/FA2H/GUCY1A2/CYP2A6/NOX4	21
MF	GO:0050840	extracellular matrix binding	13/851	57/17696	2.29812e-06	6.18267e-05	5.14247e-05	CCN1/BGN/THBS1/ECM1/SHH/VEGFA/SPP1/LGALS1/VTN/SPARC/ADGRG1/SPARCL1/SPOCK1	13
MF	GO:0008106	alcohol dehydrogenase (NADP+) activity	8/851	21/17696	3.21896e-06	8.38942e-05	6.97795e-05	AKR1C2/AKR1C1/AKR1B10/AKR1C3/AKR1B15/ALDH3A1/AKR1C4/RDH12	8
MF	GO:0005506	iron ion binding	22/851	152/17696	3.67738e-06	9.29374e-05	7.73012e-05	CYP17A1/CYP1A1/CYP2B6/PHYH/P3H3/CYP4F12/BBOX1/ALOX15B/ACO2/CYP51A1/AOX1/CYP4F3/CYP3A7/AGMO/LTF/XDH/CYP4F11/CYP2C8/CYP2C9/FA2H/CYP2A6/MSMO1	22
MF	GO:0048407	platelet-derived growth factor binding	6/851	11/17696	4.56083e-06	0.000111875	9.30523e-05	COL3A1/COL1A1/COL1A2/COL5A1/PDGFRB/COL4A1	6
MF	GO:0005342	organic acid transmembrane transporter activity	21/851	153/17696	1.40577e-05	0.000325669	0.000270877	SLC51A/SLC38A3/SLC17A1/SLCO1B1/SLC38A5/ABCC2/SLC26A3/SLC6A19/AKR1C4/SLC13A1/SLC7A11/SLC43A1/SLC1A1/SLC16A13/SLC10A2/SLC6A9/ABCC3/SLC13A2/SLC27A2/SLC3A1/SLC36A2	21
MF	GO:0046943	carboxylic acid transmembrane transporter activity	21/851	153/17696	1.40577e-05	0.000325669	0.000270877	SLC51A/SLC38A3/SLC17A1/SLCO1B1/SLC38A5/ABCC2/SLC26A3/SLC6A19/AKR1C4/SLC13A1/SLC7A11/SLC43A1/SLC1A1/SLC16A13/SLC10A2/SLC6A9/ABCC3/SLC13A2/SLC27A2/SLC3A1/SLC36A2	21
MF	GO:0004032	alditol:NADP+ 1-oxidoreductase activity	6/851	13/17696	1.55877e-05	0.000351356	0.000292242	AKR1C2/AKR1C1/AKR1B10/AKR1C3/AKR1B15/AKR1C4	6
MF	GO:0005125	cytokine activity	25/851	220/17696	5.99368e-05	0.00131545	0.00109414	CRLF1/TIMP1/CCL15/BMP3/GPI/INHBA/CCL2/VEGFA/TSLP/GREM1/CTF1/SPP1/SCGB3A1/CXCL10/SCG2/FAM3B/TNFRSF11B/IL1RN/IL34/TGFB3/TAFA5/TGFB2/CCL19/CXCL1/TNFSF18	25
MF	GO:0004857	enzyme inhibitor activity	36/851	375/17696	6.49288e-05	0.00138848	0.00115487	UGT1A8/UGT1A7/TIMP1/ITIH1/ITPRIP/SERPINE1/AMBP/CHP1/SERPINE2/UGT1A1/DPEP1/ANGPTL4/SPINK1/SOCS3/AGT/DGKI/PPP1R14D/APOA1/PHACTR3/ELFN2/CD109/IQGAP2/TIMP2/LTF/PAPLN/ANXA1/SERPINF1/SLPI/SERPINA6/PPP1R1C/PPP1R36/CST1/CDKN2B/GCHFR/SPOCK1/ANXA4	36
MF	GO:0008514	organic anion transmembrane transporter activity	24/851	210/17696	7.63686e-05	0.00159228	0.00132439	SLC51A/SLC38A3/SLC17A1/SLCO1B1/SLC38A5/ABCC2/SLC26A3/SLC6A19/AKR1C4/SLC13A1/SLC7A11/SLC43A1/SLC25A25/SLC25A24/SLC1A1/SLC16A13/SLC10A2/SLC6A9/ABCC3/SLC13A2/SLC27A2/SLC37A4/SLC3A1/SLC36A2	24
MF	GO:0015175	neutral amino acid transmembrane transporter activity	8/851	31/17696	8.12818e-05	0.00165339	0.00137522	SLC38A3/SLC38A5/SLC6A19/SLC7A11/SLC43A1/SLC1A1/SLC6A9/SLC36A2	8
MF	GO:0008391	arachidonic acid monooxygenase activity	6/851	17/17696	9.52292e-05	0.00189098	0.00157283	CYP1A1/CYP2B6/CYP4F12/CYP2C8/CYP2C9/CYP2A6	6
MF	GO:0001965	G-protein alpha-subunit binding	7/851	24/17696	9.77748e-05	0.00189638	0.00157732	HTR2A/LPAR3/F2R/RGS4/ADGRV1/RGS1/F2RL1	7
MF	GO:0016903	oxidoreductase activity, acting on the aldehyde or oxo group of donors	9/851	43/17696	0.000169947	0.00322126	0.0026793	AKR1B10/ALDH1A1/AKR1C3/ALDH3A2/ALDH3A1/AKR1C4/OGDHL/AOX1/ALDH1A2	9
MF	GO:0016702	oxidoreductase activity, acting on single donors with incorporation of molecular oxygen, incorporation of two atoms of oxygen	7/851	27/17696	0.0002211	0.00409772	0.0034083	PIR/PTGS2/BBOX1/BCO1/ALOX15B/HGD/BCO2	7
MF	GO:0016725	oxidoreductase activity, acting on CH or CH2 groups	5/851	13/17696	0.000236744	0.0042461	0.00353172	AOX1/CYP3A7/XDH/CYP2C8/CYP2C9	5
MF	GO:0070851	growth factor receptor binding	17/851	134/17696	0.000239289	0.0042461	0.00353172	EGF/FGF5/FGF19/ECM1/VEGFA/TSLP/GREM1/EREG/FGF7/IL1RN/ITGA5/SLC9A3R1/PDGFRB/EFEMP1/TGFA/HIP1/FGF10	17
MF	GO:0016701	oxidoreductase activity, acting on single donors with incorporation of molecular oxygen	7/851	28/17696	0.000282664	0.00491128	0.00408498	PIR/PTGS2/BBOX1/BCO1/ALOX15B/HGD/BCO2	7
MF	GO:0017147	Wnt-protein binding	8/851	37/17696	0.000307963	0.00524165	0.00435977	EGF/SFRP4/CTHRC1/FRZB/TRABD2B/SFRP2/ROR2/APCDD1	8
MF	GO:0019841	retinol binding	5/851	15/17696	0.000509674	0.00850137	0.00707106	RBP4/RBP2/CRABP2/LRAT/C8G	5
MF	GO:0005319	lipid transporter activity	16/851	131/17696	0.000554084	0.0090609	0.00753646	RBP4/SLC51A/SLCO1B1/APOB/ABCD3/AKR1C4/SPNS2/ABCA13/APOA1/ABCB1/PLSCR3/STARD5/SLC10A2/ABCC3/ANO3/SLC27A2	16
MF	GO:0051371	muscle alpha-actinin binding	6/851	23/17696	0.000606292	0.00972399	0.00808798	PDLIM3/PDLIM4/PALLD/TTN/LDB3/PDLIM7	6
MF	GO:0016712	oxidoreductase activity, acting on paired donors, with incorporation or reduction of molecular oxygen, reduced flavin or flavoprotein as one donor, and incorporation of one atom of oxygen	7/851	32/17696	0.000679377	0.0106906	0.00889195	CYP1A1/CYP2B6/CYP4F12/CYP3A7/CYP2C8/CYP2C9/CYP2A6	7
MF	GO:0008392	arachidonic acid epoxygenase activity	5/851	16/17696	0.000712151	0.0109988	0.0091483	CYP2B6/CYP4F12/CYP2C8/CYP2C9/CYP2A6	5
MF	GO:0001618	virus receptor activity	11/851	74/17696	0.000777942	0.0115858	0.00963654	HTR2A/ICAM1/SCARB1/CXCR4/F11R/ITGA5/CXADR/EFNB2/ACE2/HSPA1B/HSPA1A	11
MF	GO:0140272	exogenous protein binding	11/851	74/17696	0.000777942	0.0115858	0.00963654	HTR2A/ICAM1/SCARB1/CXCR4/F11R/ITGA5/CXADR/EFNB2/ACE2/HSPA1B/HSPA1A	11
MF	GO:0016209	antioxidant activity	12/851	86/17696	0.000816255	0.0119431	0.00993374	ALB/MGST1/PTGS2/GSTA1/NQO1/SOD3/MGST2/DUOX2/TXN/GPX2/PXDN/SRXN1	12
MF	GO:0061134	peptidase regulator activity	22/851	219/17696	0.000901761	0.0129667	0.0107851	TIMP1/ITIH1/SERPINE1/CAV1/AMBP/SERPINE2/DPEP1/SPINK1/AGT/FN1/CTSH/CD109/SFRP2/TIMP2/LTF/PAPLN/SERPINF1/SLPI/SERPINA6/CST1/NLRP1/SPOCK1	22
MF	GO:0015125	bile acid transmembrane transporter activity	5/851	17/17696	0.000969202	0.0137002	0.0113953	SLC51A/SLCO1B1/AKR1C4/SLC10A2/ABCC3	5
MF	GO:0016229	steroid dehydrogenase activity	7/851	35/17696	0.0011972	0.0163682	0.0136144	AKR1C2/AKR1C1/AKR1C3/AKR1B15/AKR1C4/HSD11B2/HSD11B1	7
MF	GO:0016620	oxidoreductase activity, acting on the aldehyde or oxo group of donors, NAD or NADP as acceptor	7/851	35/17696	0.0011972	0.0163682	0.0136144	AKR1B10/ALDH1A1/AKR1C3/ALDH3A2/ALDH3A1/AKR1C4/ALDH1A2	7
MF	GO:0052650	NADP-retinol dehydrogenase activity	4/851	11/17696	0.00133563	0.0179663	0.0149436	AKR1B10/AKR1C3/AKR1B15/RDH12	4
MF	GO:0042805	actinin binding	8/851	46/17696	0.00142043	0.0183573	0.0152688	PDLIM3/CACNA1C/PDLIM4/PALLD/TTN/LDB3/PDLIM7/CSRP1	8
MF	GO:0030246	carbohydrate binding	25/851	271/17696	0.00142878	0.0183573	0.0152688	DCDC1/LGALS9C/G6PD/SORD/ZP3/CRYBG2/VCAN/PHYH/MGAM/SELE/P3H3/GPI/GALNT3/LGALS9B/LGALS1/CLEC11A/VTN/GALNT12/ALDOB/SLC2A3/LGALS2/GALNT4/CD93/ASGR2/MLEC	25
MF	GO:0005126	cytokine receptor binding	26/851	286/17696	0.00143073	0.0183573	0.0152688	CRLF1/CNTFR/CCL15/CCRL2/BMP3/INHBA/CCL2/ECM1/VEGFA/TSLP/GREM1/CTF1/CXCL10/PXDN/IL1RN/IL34/TGFB3/ITGA5/TGFB2/SMAD7/RASL11B/LRG1/CCL19/CXCL1/DEFB1/TNFSF18	26
MF	GO:0001968	fibronectin binding	6/851	27/17696	0.00150839	0.0190606	0.0158538	CCN2/THBS1/VEGFA/SFRP2/CCDC80/FSTL3	6
MF	GO:0015293	symporter activity	16/851	144/17696	0.00154381	0.019217	0.0159838	SLC38A3/SLC17A1/SLC6A19/SLC13A1/SLC2A10/SLC15A1/SLC1A1/SLC12A7/SLC16A13/SLC10A5/SLC10A2/SLC6A9/SLC13A2/SLC5A11/SLC36A2/SLC5A1	16
MF	GO:0008376	acetylgalactosaminyltransferase activity	8/851	47/17696	0.00164089	0.0201251	0.0167391	B4GALNT2/B3GNT9/GALNT3/GALNT12/GALNT4/B3GNT3/B3GALT2/B3GALT5	8
MF	GO:0051393	alpha-actinin binding	7/851	37/17696	0.00168611	0.0203799	0.0169511	PDLIM3/CACNA1C/PDLIM4/PALLD/TTN/LDB3/PDLIM7	7
MF	GO:0003779	actin binding	35/851	431/17696	0.00178456	0.0211041	0.0175535	ENC1/FHDC1/ANG/PDLIM3/MYH1/PDLIM4/TPM4/PALLD/SAMD14/PHACTR3/CNN2/CORO2A/TTN/IQGAP2/CXCR4/HOOK1/GAS2L3/ADSS1/SHROOM3/MSN/WIPF3/MYH2/LDB3/FHL3/PDLIM7/CFL2/COBL/MYH10/ANTXR1/MAP1B/CALD1/BIN1/TRPV4/HIP1/MYO5B	35
MF	GO:0004867	serine-type endopeptidase inhibitor activity	12/851	94/17696	0.00179663	0.0211041	0.0175535	ITIH1/SERPINE1/AMBP/SERPINE2/SPINK1/AGT/CD109/PAPLN/SERPINF1/SLPI/SERPINA6/SPOCK1	12
MF	GO:0005520	insulin-like growth factor binding	6/851	28/17696	0.00184268	0.0213444	0.0177533	CCN1/CCN2/IGFBP7/IGFALS/IGFBP2/HTRA3	6
MF	GO:0016597	amino acid binding	9/851	59/17696	0.00190583	0.0217735	0.0181102	TAT/GLDC/ASS1/CASTOR1/GRM7/GCLC/SLC1A1/GLRB/GCHFR	9
MF	GO:0008395	steroid hydroxylase activity	7/851	38/17696	0.00198243	0.0220446	0.0183357	CYP17A1/CYP1A1/CYP2B6/CYP3A7/CYP2C8/CYP2C9/CYP2A6	7
MF	GO:0042056	chemoattractant activity	7/851	38/17696	0.00198243	0.0220446	0.0183357	CCL15/VEGFA/FGF7/CXCL10/SCG2/HGF/FGF10	7
MF	GO:0033764	steroid dehydrogenase activity, acting on the CH-OH group of donors, NAD or NADP as acceptor	6/851	29/17696	0.00223018	0.0244733	0.0203558	AKR1C1/AKR1C3/AKR1B15/AKR1C4/HSD11B2/HSD11B1	6
MF	GO:0015291	secondary active transmembrane transporter activity	22/851	237/17696	0.00248117	0.026874	0.0223526	SLC38A3/SLC17A1/SLCO1B1/SLC26A3/SLC6A19/SLC13A1/SLC47A1/SLC7A11/SLC9A3/SLC2A10/SLC15A1/SLC1A1/SLC12A7/SLC16A13/SLC10A5/SLC10A2/SLC6A9/SLC13A2/SLC5A11/SLC37A4/SLC36A2/SLC5A1	22
MF	GO:0019842	vitamin binding	15/851	138/17696	0.00264817	0.028315	0.0235512	TAT/RBP4/ALB/GLDC/PHYH/P3H3/RBP2/GOT1/OGDHL/CRABP2/LRAT/TCN2/ALDH1A2/AGXT2/C8G	15
MF	GO:0008028	monocarboxylic acid transmembrane transporter activity	8/851	51/17696	0.0028063	0.0295713	0.0245961	SLC51A/SLC38A3/SLCO1B1/AKR1C4/SLC16A13/SLC10A2/ABCC3/SLC27A2	8
MF	GO:0008237	metallopeptidase activity	18/851	181/17696	0.00283658	0.0295713	0.0245961	FAP/ERMP1/DPEP1/PAPPA2/FOLH1/PHEX/MMP23B/MMP11/CPB2/MMP2/MMEL1/TRABD2B/ADAMTS4/ADAMTS10/CPZ/ADAMTS2/ACE2/AEBP1	18
MF	GO:0061135	endopeptidase regulator activity	18/851	182/17696	0.00301065	0.0309986	0.0257832	TIMP1/ITIH1/SERPINE1/AMBP/SERPINE2/DPEP1/SPINK1/AGT/CD109/SFRP2/TIMP2/LTF/PAPLN/SERPINF1/SLPI/SERPINA6/CST1/SPOCK1	18
MF	GO:0002020	protease binding	14/851	128/17696	0.00341786	0.0339869	0.0282688	FAP/TIMP1/COL3A1/SERPINE1/COL1A1/COMP/COL1A2/ECM1/FN1/ADAMTS4/TTN/TIMP2/LRP1/BIN1	14
MF	GO:0019955	cytokine binding	14/851	128/17696	0.00341786	0.0339869	0.0282688	CRLF1/CNTFR/CCRL2/COMP/THBS1/GREM1/CD109/PXDN/CXCR4/IL1RN/TGFB3/LTBP1/LEPR/NBL1	14
MF	GO:0008509	anion transmembrane transporter activity	28/851	336/17696	0.00342314	0.0339869	0.0282688	SLC51A/SLC38A3/SLC17A1/SLCO1B1/SLC38A5/ABCC2/SLC26A3/SLC6A19/AKR1C4/SLC13A1/GABRB3/SLC7A11/SLC43A1/SLC9A3/SLC25A25/SLC25A24/SLC1A1/SLC12A7/SLC16A13/SLC10A2/GLRB/SLC6A9/ABCC3/SLC13A2/SLC27A2/SLC37A4/SLC3A1/SLC36A2	28
MF	GO:0005516	calmodulin binding	19/851	200/17696	0.00367156	0.0360245	0.0299636	NGFR/GAP43/MYH1/RGS4/CACNA1C/CNN2/TTN/IQGAP2/UNC13C/RGS1/MYH2/TRPV6/RRAD/MYH10/CALD1/TRPV4/RGS16/MYO5B/AEBP1	19
MF	GO:0015294	solute:cation symporter activity	12/851	103/17696	0.0038863	0.0376881	0.0313473	SLC6A19/SLC13A1/SLC2A10/SLC15A1/SLC1A1/SLC12A7/SLC10A2/SLC6A9/SLC13A2/SLC5A11/SLC36A2/SLC5A1	12
MF	GO:0016829	lyase activity	18/851	187/17696	0.00401992	0.038299	0.0318554	CYP17A1/FAHD1/CYP1A1/ME1/CA4/GLDC/GGCT/GOT1/MGST2/ACO2/PCK2/ALDOB/CA9/ACMSD/CA2/ASL/GUCY1A2/CA13	18
MF	GO:0015179	L-amino acid transmembrane transporter activity	8/851	54/17696	0.00404114	0.038299	0.0318554	SLC38A3/SLC38A5/SLC7A11/SLC43A1/SLC1A1/SLC6A9/SLC3A1/SLC36A2	8
MF	GO:0051213	dioxygenase activity	11/851	91/17696	0.00421251	0.0394745	0.0328331	PIR/PTGS2/PHYH/P3H3/BBOX1/BCO1/ALOX15B/HGD/ASPHD1/BCO2/TRMT9B	11
MF	GO:0005154	epidermal growth factor receptor binding	6/851	33/17696	0.00441637	0.040925	0.0340396	EGF/EREG/ITGA5/EFEMP1/TGFA/HIP1	6
MF	GO:0004866	endopeptidase inhibitor activity	17/851	175/17696	0.00464607	0.0420225	0.0349524	TIMP1/ITIH1/SERPINE1/AMBP/SERPINE2/DPEP1/SPINK1/AGT/CD109/TIMP2/LTF/PAPLN/SERPINF1/SLPI/SERPINA6/CST1/SPOCK1	17
MF	GO:1901618	organic hydroxy compound transmembrane transporter activity	7/851	44/17696	0.00469065	0.0420225	0.0349524	RBP4/SLC51A/SLCO1B1/AKR1C4/SLC10A2/ABCC3/SLC5A11	7
MF	GO:0004029	aldehyde dehydrogenase (NAD+) activity	4/851	15/17696	0.00473635	0.0420225	0.0349524	ALDH1A1/ALDH3A2/ALDH3A1/ALDH1A2	4
MF	GO:0004089	carbonate dehydratase activity	4/851	15/17696	0.00473635	0.0420225	0.0349524	CA4/CA9/CA2/CA13	4
MF	GO:0016782	transferase activity, transferring sulfur-containing groups	9/851	69/17696	0.00561502	0.0492939	0.0410005	SULT2B1/SULT1C4/GAL3ST1/CHST12/SUGCT/CHST8/NDST4/TST/CHST4	9
MF	GO:0022804	active transmembrane transporter activity	28/851	349/17696	0.00574912	0.0499455	0.0415425	ABCB6/SLC38A3/SLC17A1/SLCO1B1/ABCC2/SLC26A3/ABCD3/SLC6A19/SLC13A1/ABCA13/SLC47A1/SLC7A11/SLC9A3/SLC2A10/SLC15A1/ABCB1/SLC1A1/SLC12A7/SLC16A13/SLC10A5/SLC10A2/SLC6A9/ABCC3/SLC13A2/SLC5A11/SLC37A4/SLC36A2/SLC5A1	28
